# Supplementary material for: Environmental determinants and demographic influences on global urban microbiomes, antimicrobial resistance and pathogenicity
Source: PubMed Central journal article supplement (PMC10703778; doi:10.1038/s41522-023-00459-4), 2023-12-07
Supplement: 41522_2023_459_MOESM1_ESM.pdf [file 41522_2023_459_MOESM1_ESM.pdf]

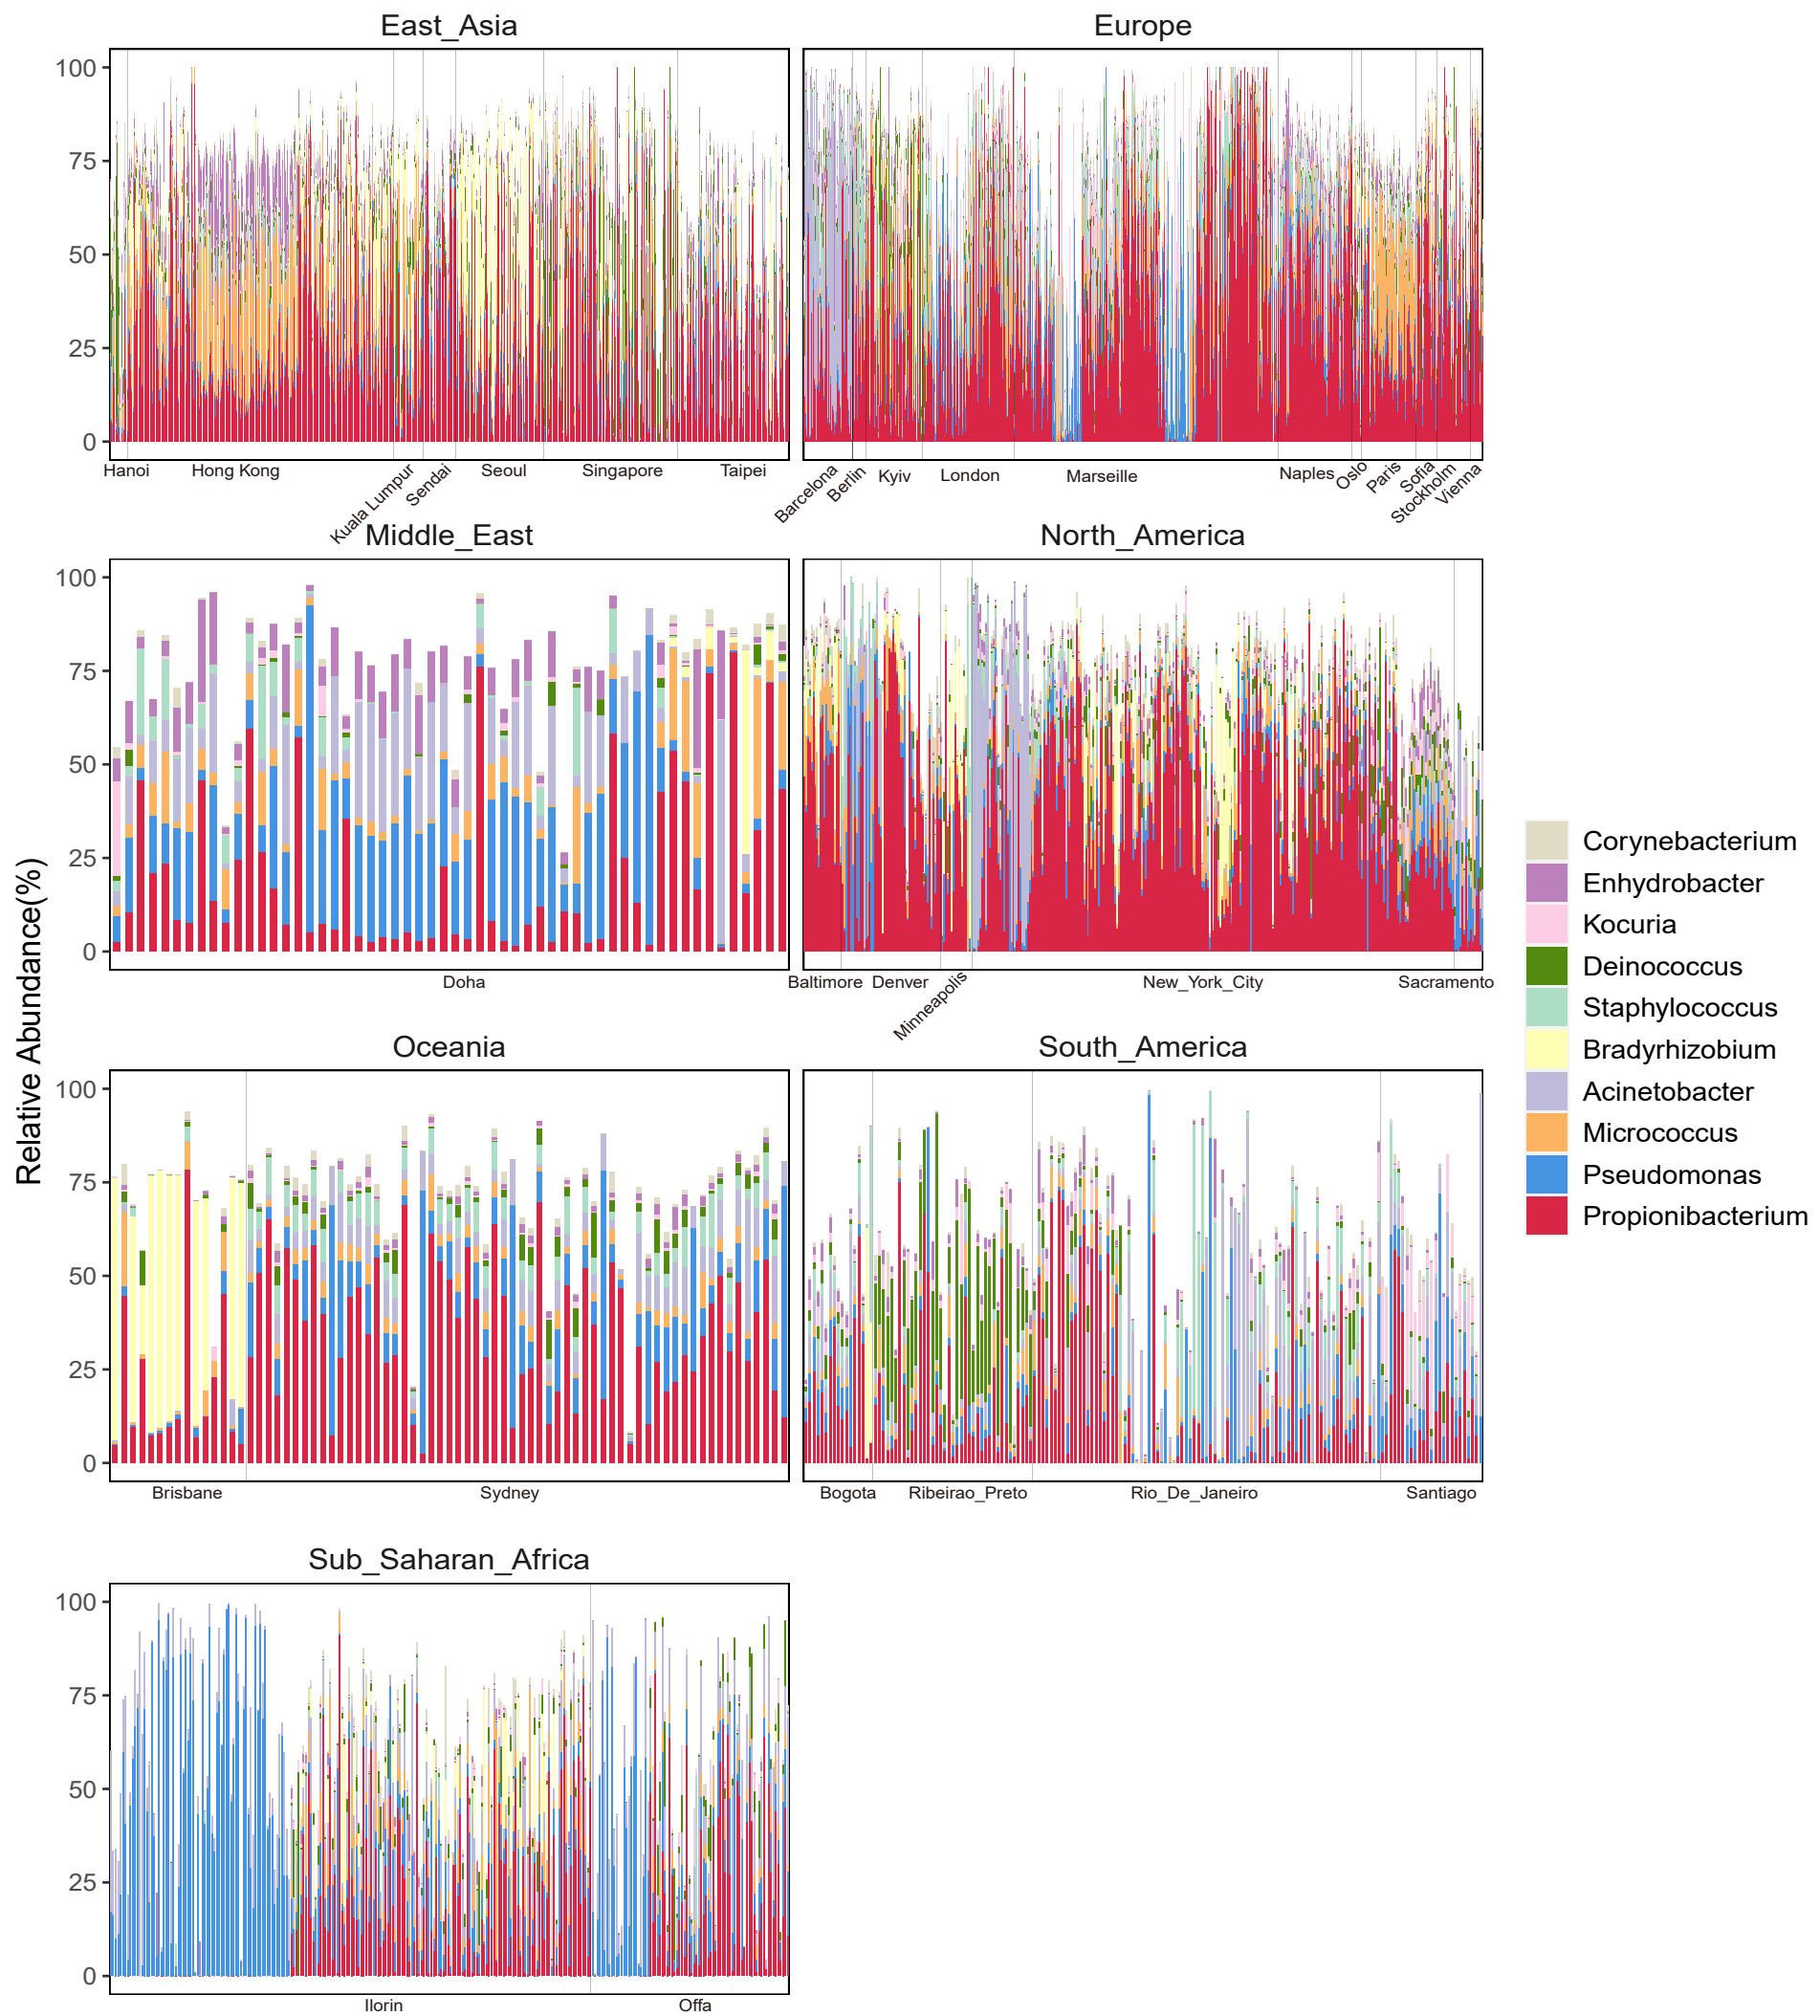

**Supplementary Figure 1.** Distribution of the top ten genus of all samples, grouped by continent.

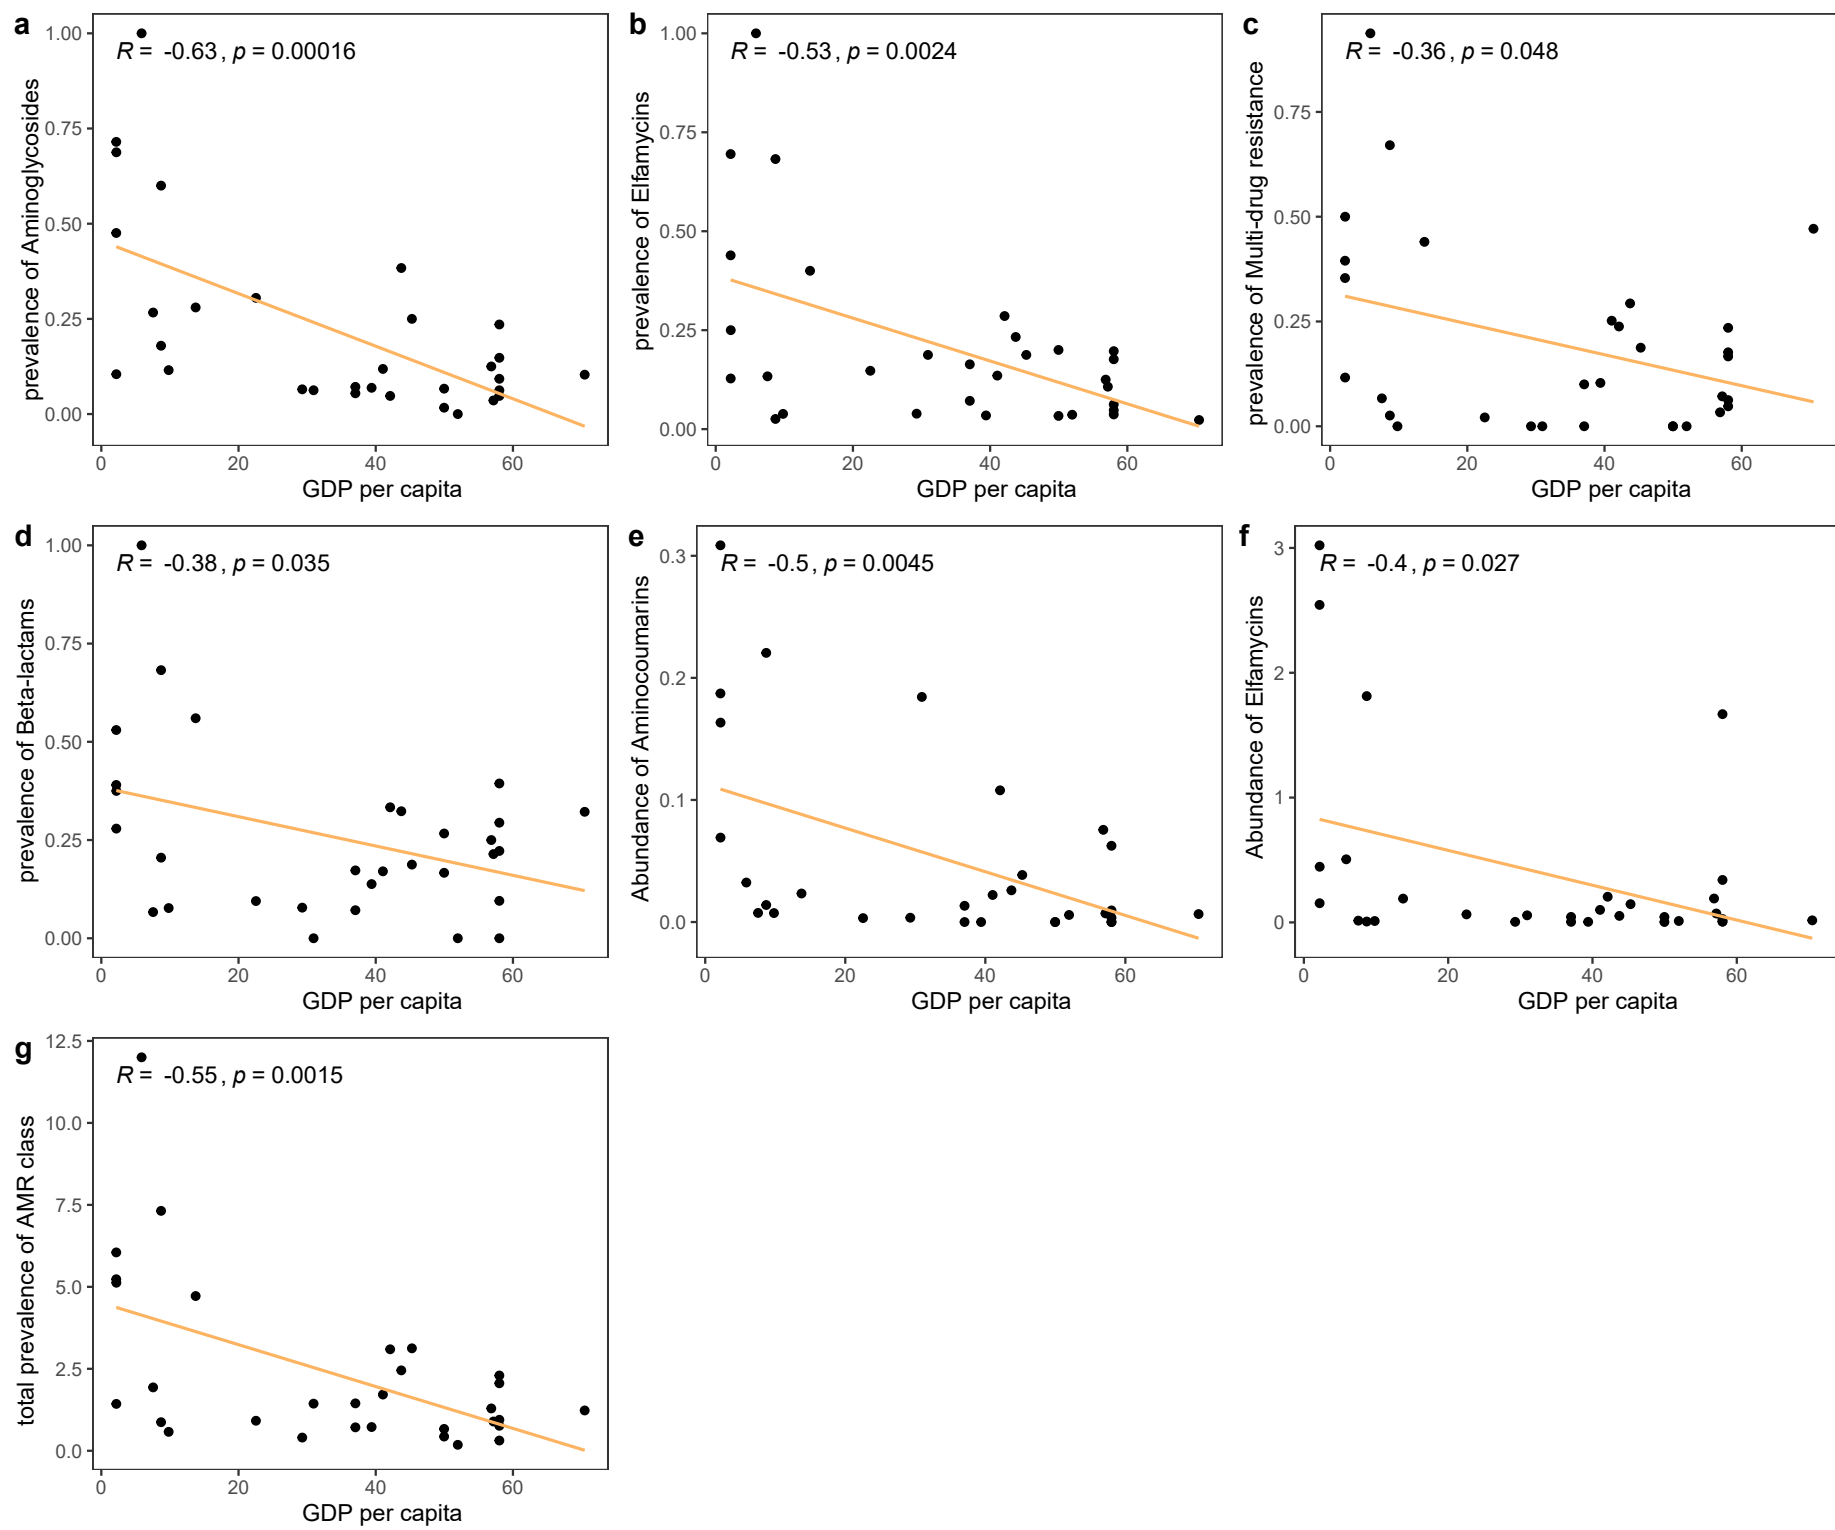

**Supplementary Figure 2.** The relationship between GDP per capita and the prevalence of Aminoglycosides (a), Eifamycins (b), Multi-drug resistance (c), Beta-lactams (d), total AMR class (g), and the abundance of Aminocoumarins (e), Eifamycins (f), as the main correlated environmental variable with AMR genes by drug class. Linear regression analysis and Pearson correlation coefficient was used.

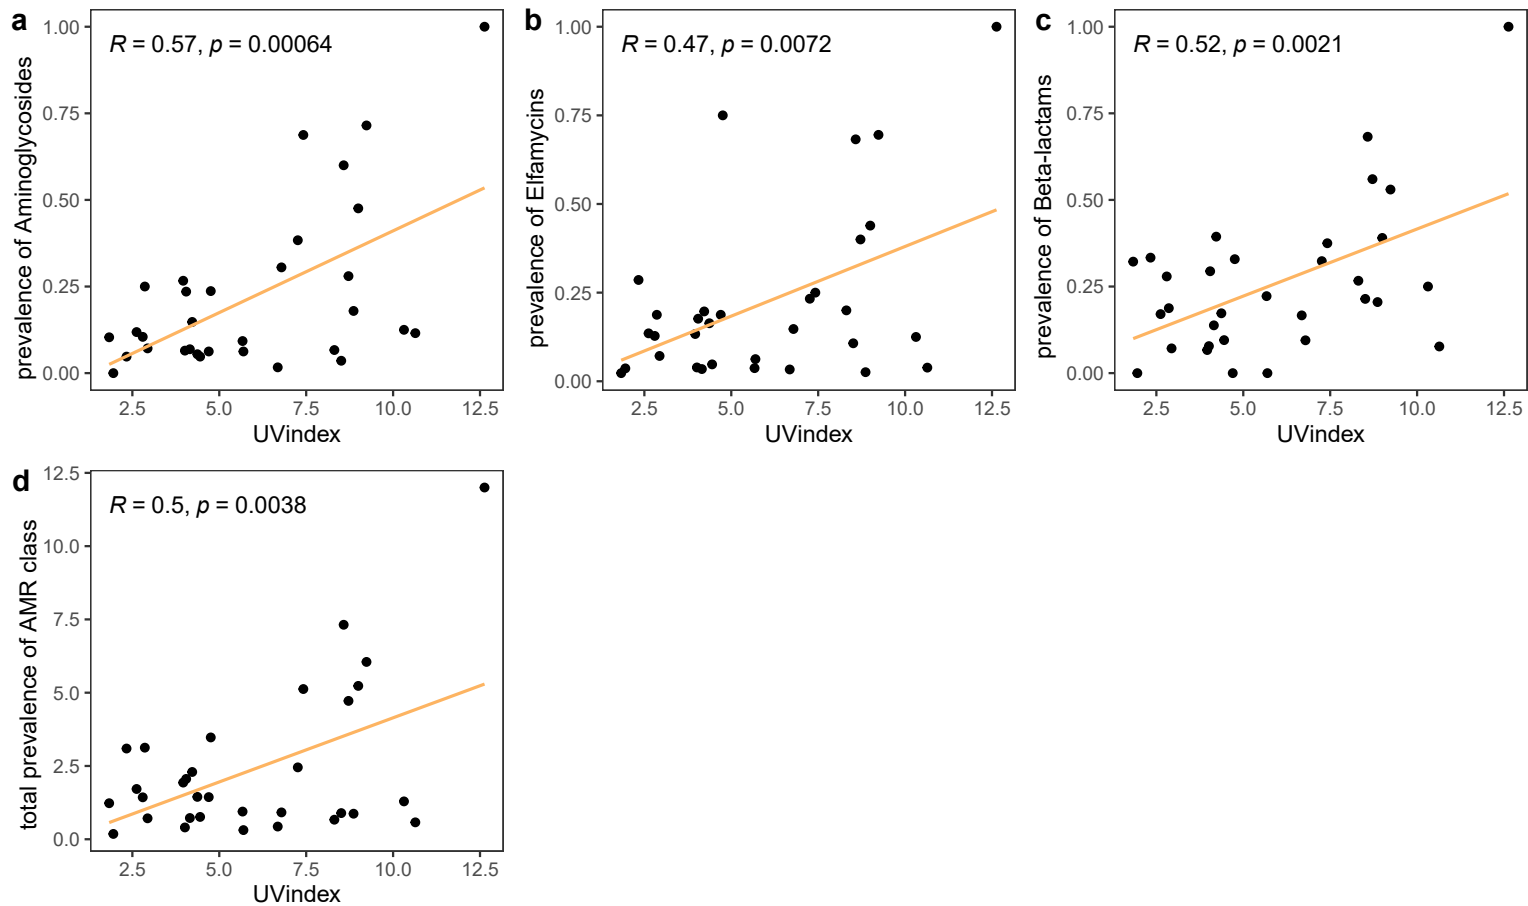

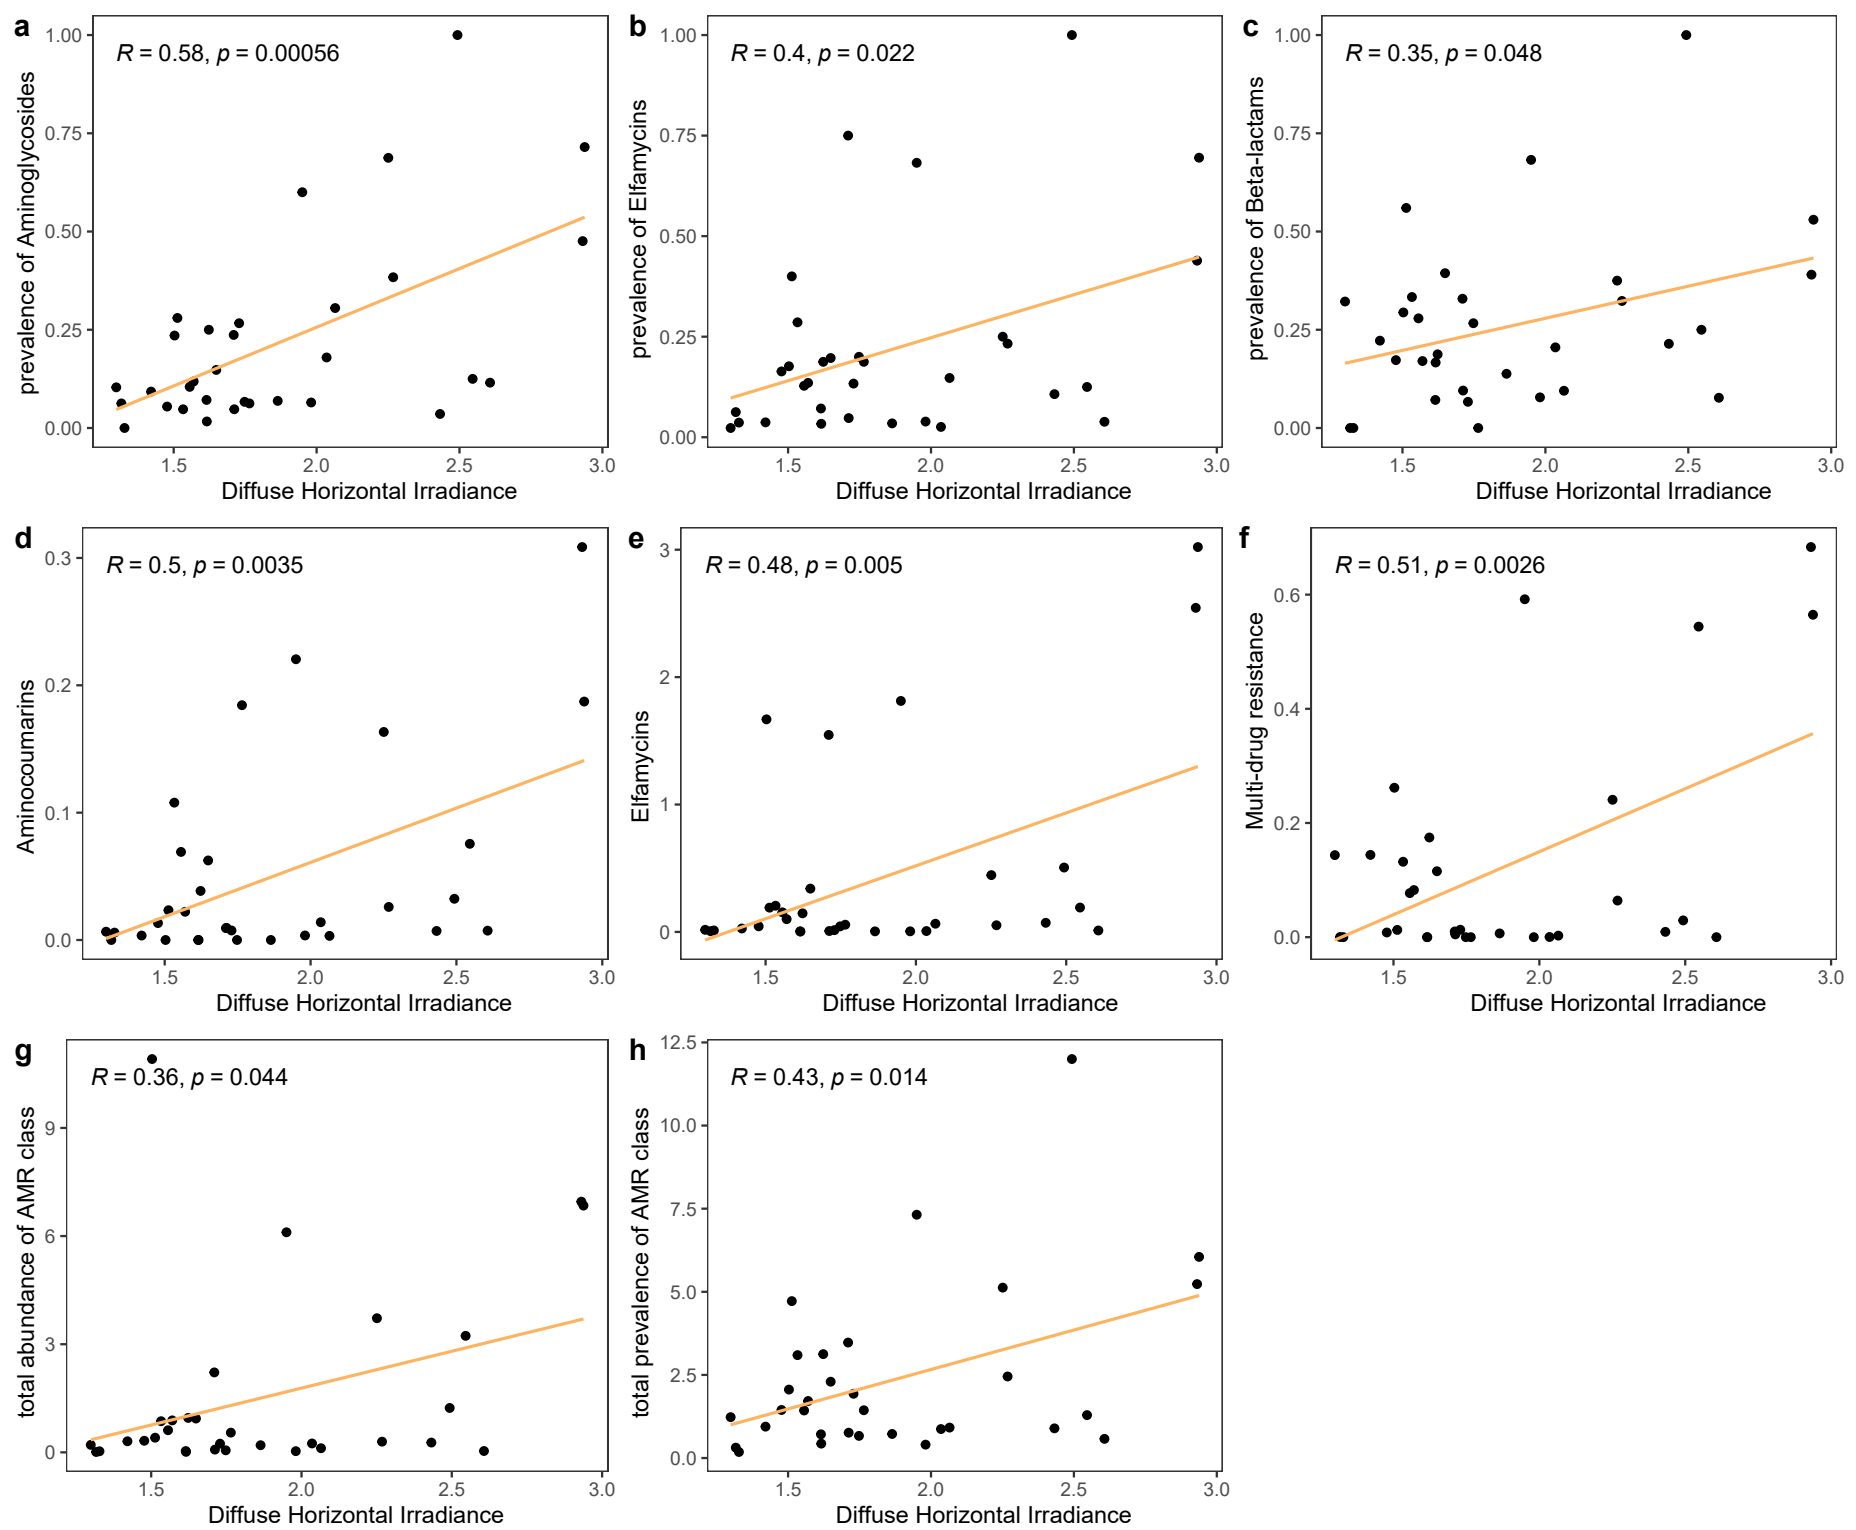

**Supplementary Figure 4.** The relationship between Diffuse Horizontal Irradiance and the prevalence of Aminoglycosides (a), Eifamycins (b), Beta-lactams (c), total AMR classes (h), and the abundance of Aminocoumarins (d), Eifamycins (e), Multi-drug resistance (f), total AMR classes (g). Linear regression analysis and Pearson correlation coefficient was used.

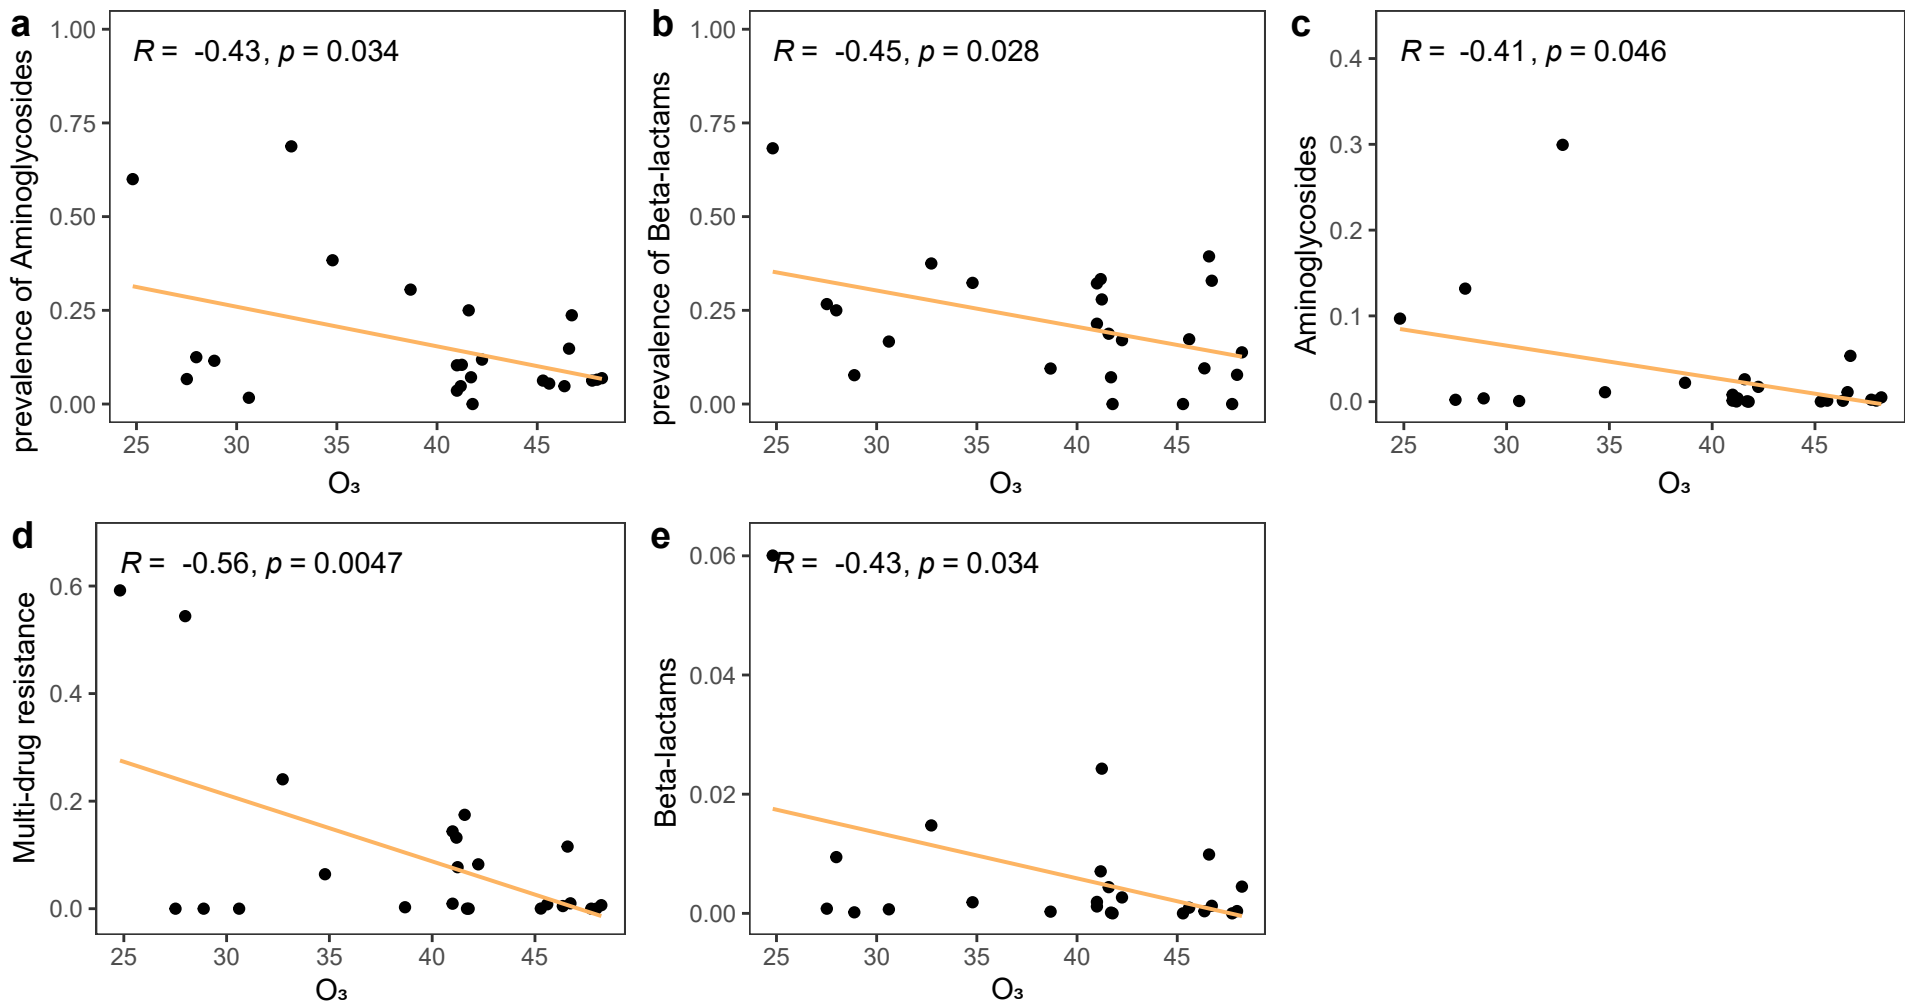

**Supplementary Figure 5.** The relationship between  $O_3$  concentration and the prevalence of Aminoglycosides (a), Beta-lactams (b), and the abundance of Aminoglycosides (c), Multi-drug resistance (d), Beta-lactams (e). Linear regression analysis and Pearson correlation coefficient was used.

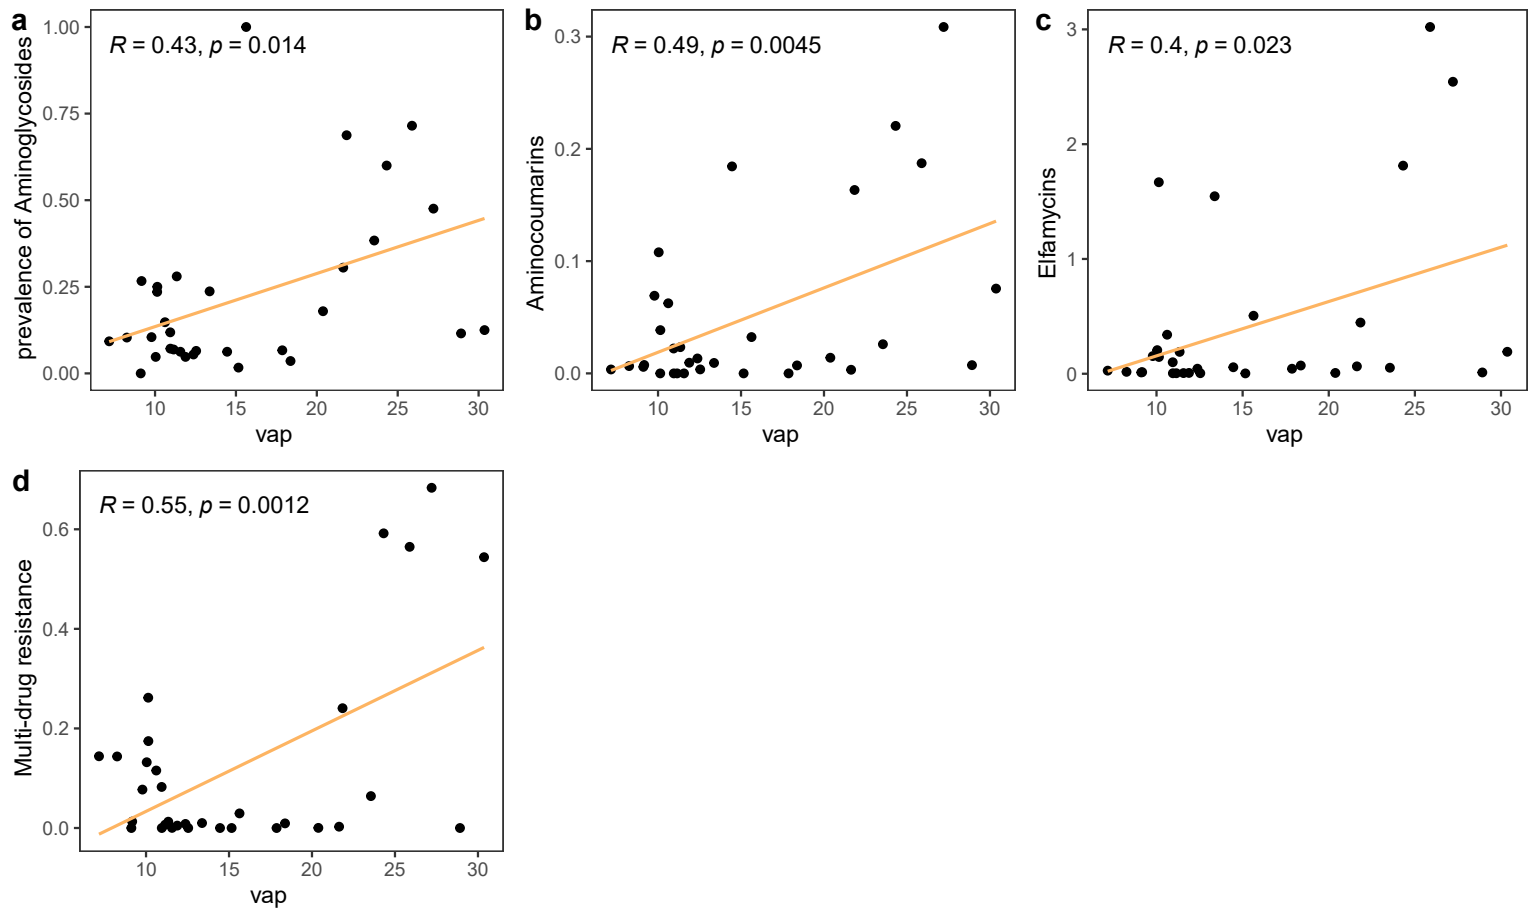

**Supplementary Figure 6.** The relationship between vapor pressure and the prevalence of Aminoglycosides (a), and the abundance of Aminocoumarins (b), Eflamycins (c), Multi-drug resistance (d). Linear regression analysis and Pearson correlation coefficient was used.

**Supplementary Table 1. Details of environment and demographic data.**

| environment factor          | definition                                                                                                                                                                                                                                                                                                                                                                                                                                                                                                                                                                                  | unit                                                                                                                                                                                                                                                                                                                                                                                                                                                                                                                        | median(Q1,Q3)                           | NA% in 32 cities                    | date   | time            | database                                                                    | link                                                                              |                                                                             |
|-----------------------------|---------------------------------------------------------------------------------------------------------------------------------------------------------------------------------------------------------------------------------------------------------------------------------------------------------------------------------------------------------------------------------------------------------------------------------------------------------------------------------------------------------------------------------------------------------------------------------------------|-----------------------------------------------------------------------------------------------------------------------------------------------------------------------------------------------------------------------------------------------------------------------------------------------------------------------------------------------------------------------------------------------------------------------------------------------------------------------------------------------------------------------------|-----------------------------------------|-------------------------------------|--------|-----------------|-----------------------------------------------------------------------------|-----------------------------------------------------------------------------------|-----------------------------------------------------------------------------|
| air pollutant               | PM2.5 concentration                                                                                                                                                                                                                                                                                                                                                                                                                                                                                                                                                                         | annual average PM2.5 concentration                                                                                                                                                                                                                                                                                                                                                                                                                                                                                          | µg/m <sup>3</sup>                       | 11.71(7.67,16.42)                   | 0.00%  | 2016            | GBD                                                                         | <a href="https://global.burdenofdisease.org">Global Burden of Disease</a>         |                                                                             |
|                             | PM10 concentration                                                                                                                                                                                                                                                                                                                                                                                                                                                                                                                                                                          | annual average PM10 concentration                                                                                                                                                                                                                                                                                                                                                                                                                                                                                           | µg/m <sup>3</sup>                       | 19.14(16.15,28.11)                  | 53.13% | 2016            | WHO                                                                         | <a href="https://www.who.int/airquality">Air pollution (who.int)</a>              |                                                                             |
|                             | O3 concentration                                                                                                                                                                                                                                                                                                                                                                                                                                                                                                                                                                            | annual average O3 concentration                                                                                                                                                                                                                                                                                                                                                                                                                                                                                             | ppbv                                    | 41.58(34.79,45.6)                   | 25.00% | 2016            | EARTHDATA                                                                   | <a href="https://giovanni.gsfc.nasa.gov">https://giovanni.gsfc.nasa.gov</a>       |                                                                             |
|                             | NO2 concentration                                                                                                                                                                                                                                                                                                                                                                                                                                                                                                                                                                           | annual average NO2 concentration                                                                                                                                                                                                                                                                                                                                                                                                                                                                                            | µg/m <sup>3</sup>                       | 29.24(19.2,39.62)                   | 46.88% | 2016            | EARTHDATA                                                                   | <a href="https://giovanni.gsfc.nasa.gov">https://giovanni.gsfc.nasa.gov</a>       |                                                                             |
| CO concentration            | annual average CO concentration                                                                                                                                                                                                                                                                                                                                                                                                                                                                                                                                                             | ppbv                                                                                                                                                                                                                                                                                                                                                                                                                                                                                                                        | 136.91(132.56,138.74)                   | 34.38%                              | 2016   | EARTHDATA       | <a href="https://giovanni.gsfc.nasa.gov">https://giovanni.gsfc.nasa.gov</a> |                                                                                   |                                                                             |
| soil pH                     | soil pH in H2O; 10 cm depth below surface.                                                                                                                                                                                                                                                                                                                                                                                                                                                                                                                                                  | *10 <sup>-1</sup>                                                                                                                                                                                                                                                                                                                                                                                                                                                                                                           | 63(56,69.5)                             | 0.00%                               | 2016   | yearly          | Zenodo                                                                      | <a href="https://zenodo.org/record/1000000">https://zenodo.org/record/1000000</a> |                                                                             |
| soil organic carbon density | Soil organic carbon density                                                                                                                                                                                                                                                                                                                                                                                                                                                                                                                                                                 | t ha <sup>-1</sup>                                                                                                                                                                                                                                                                                                                                                                                                                                                                                                          | 12(7,16)                                | 0.00%                               |        | yearly          | Land-Atmosphere Interaction Research Group at Sun Yat-sen                   | <a href="http://globalchange.hku.hk">http://globalchange.hku.hk</a>               |                                                                             |
| soil organic carbon         | soil organic carbon at 4.5cm;Organic Carbon is present in the soil organic matter fraction                                                                                                                                                                                                                                                                                                                                                                                                                                                                                                  | % of weight, 0.01                                                                                                                                                                                                                                                                                                                                                                                                                                                                                                           | 185.64(131.32,346.47)                   | 9.38%                               |        | yearly          | Land-Atmosphere Interaction Research Group at Sun Yat-sen                   | <a href="http://globalchange.hku.hk">http://globalchange.hku.hk</a>               |                                                                             |
| total carbon                | Total carbon in soils is the sum of both organic and inorganic C.                                                                                                                                                                                                                                                                                                                                                                                                                                                                                                                           | % of weight, 0.01                                                                                                                                                                                                                                                                                                                                                                                                                                                                                                           | 247.41(175.29,306.84)                   | 0.00%                               |        | yearly          | Land-Atmosphere Interaction Research Group at Sun Yat-sen                   | <a href="http://globalchange.hku.hk">http://globalchange.hku.hk</a>               |                                                                             |
| soil characteristics        | total phosphorus                                                                                                                                                                                                                                                                                                                                                                                                                                                                                                                                                                            | total phosphorus in soil                                                                                                                                                                                                                                                                                                                                                                                                                                                                                                    | % of weight, 0.0001                     | 531.57(339.81,607.94)               | 0.00%  |                 | yearly                                                                      | Land-Atmosphere Interaction Research Group at Sun Yat-sen                         | <a href="http://globalchange.hku.hk">http://globalchange.hku.hk</a>         |
|                             | soil moisture                                                                                                                                                                                                                                                                                                                                                                                                                                                                                                                                                                               | soil moisture(0-10cm)/Soil water Content: The water lost from soil upon drying to constant mass at 105 degrees Celsius, expressed either as the mass of water per unit mass of drysoil or as the volume of water per unit bulk volume of soil.                                                                                                                                                                                                                                                                              | kg/m <sup>2</sup>                       | 31.4(29.15,34.47)                   | 6.25%  | 2016            | Monthly average                                                             | EARTHDATA                                                                         | <a href="https://giovanni.gsfc.nasa.gov">https://giovanni.gsfc.nasa.gov</a> |
|                             | soil temperature                                                                                                                                                                                                                                                                                                                                                                                                                                                                                                                                                                            | soil temperature(0-10cm): The temperature measured at a given soil depth, typically at 2, 4, 8, and sometimes 20 and 40 in. Many biological processes, including seed germination, plant emergence, microbial activity, and soil respiration are a function of soil temperature.                                                                                                                                                                                                                                            | K                                       | 288.13(283.15,293.68)               | 6.25%  | 2016            | Monthly average                                                             | EARTHDATA                                                                         | <a href="https://giovanni.gsfc.nasa.gov">https://giovanni.gsfc.nasa.gov</a> |
| precipitation               | annual average precipitation                                                                                                                                                                                                                                                                                                                                                                                                                                                                                                                                                                | mm                                                                                                                                                                                                                                                                                                                                                                                                                                                                                                                          | 945.44(694.93,1279.49)                  | 0.00%                               | 2016   | Monthly average | WorldClim                                                                   | <a href="http://worldclim.org">WorldClimWorldClim</a>                             |                                                                             |
| precipitation               | precipitation concentration index                                                                                                                                                                                                                                                                                                                                                                                                                                                                                                                                                           | Precipitation Concentration Index:The larger the difference in monthly precipitation, the larger the concentration of precipitation during intra-annual, PCI values that less than 10 indicate a uniform monthly rainfall distribution in the year, whereas values from 11 to 20 denote seasonality of precipitation distribution. Values above 20 correspond to climates with substantial monthly variability in precipitation amounts, therefore, the greater the PCI value, the more variable the monthly precipitation. |                                         | 10.96(9.81,12.65)                   | 0.00%  | 2016            | Monthly average                                                             | WorldClim                                                                         | <a href="http://worldclim.org">WorldClimWorldClim</a>                       |
|                             | standard deviation of monthly precipitation                                                                                                                                                                                                                                                                                                                                                                                                                                                                                                                                                 | The standard deviation of monthly precipitation                                                                                                                                                                                                                                                                                                                                                                                                                                                                             |                                         | 39.0597(27.87901,75.45)             | 0.00%  | 2016            | Monthly average                                                             | WorldClim                                                                         | <a href="http://worldclim.org">WorldClimWorldClim</a>                       |
| humidity                    | DHI(Diffuse Horizontal Irradiance)                                                                                                                                                                                                                                                                                                                                                                                                                                                                                                                                                          | Diffuse Horizontal Irradiance                                                                                                                                                                                                                                                                                                                                                                                                                                                                                               | W/m <sup>2</sup>                        | 3.87(2.97,4.7)                      | 0.00%  | 2016            | daily average                                                               | SOLARGIS                                                                          | <a href="https://solargis.com/m">https://solargis.com/m</a>                 |
|                             | UV index                                                                                                                                                                                                                                                                                                                                                                                                                                                                                                                                                                                    | UV index                                                                                                                                                                                                                                                                                                                                                                                                                                                                                                                    | 1 (0°-15)                               | 4.73(2.62,7.26)                     | 0.00%  | 2016            | Monthly average                                                             | EARTHDATA                                                                         | <a href="https://giovanni.gsfc.nasa.gov">https://giovanni.gsfc.nasa.gov</a> |
|                             | wet(average rain day per month)                                                                                                                                                                                                                                                                                                                                                                                                                                                                                                                                                             | average rain day per month                                                                                                                                                                                                                                                                                                                                                                                                                                                                                                  | Days                                    | 12.98(10.42,15.46)                  | 0.00%  | 2016            | Monthly average                                                             | CEDA Archive                                                                      | <a href="https://catalogue.ceda.ac.uk">https://catalogue.ceda.ac.uk</a>     |
| vap                         | vapor pressure                                                                                                                                                                                                                                                                                                                                                                                                                                                                                                                                                                              | Hecda-Pascals (x10)                                                                                                                                                                                                                                                                                                                                                                                                                                                                                                         | 12.38(10.19,17.59)                      | 0.00%                               | 2016   | Monthly average | CEDA Archive                                                                | <a href="https://catalogue.ceda.ac.uk">https://catalogue.ceda.ac.uk</a>           |                                                                             |
| RH                          | Annual average relative humidity (RH)                                                                                                                                                                                                                                                                                                                                                                                                                                                                                                                                                       | %                                                                                                                                                                                                                                                                                                                                                                                                                                                                                                                           | 70.96(65.95,74.97)                      | 25.00%                              | 2016   | Monthly average | EARTHDATA                                                                   | <a href="https://giovanni.gsfc.nasa.gov">https://giovanni.gsfc.nasa.gov</a>       |                                                                             |
| temperature                 | temperature                                                                                                                                                                                                                                                                                                                                                                                                                                                                                                                                                                                 | Annual average temperature                                                                                                                                                                                                                                                                                                                                                                                                                                                                                                  | °C                                      | 14.52(10.22,18.75)                  | 0.00%  | 2016            | Monthly average                                                             | CEDA Archive                                                                      | <a href="https://catalogue.ceda.ac.uk">https://catalogue.ceda.ac.uk</a>     |
|                             | June temperature                                                                                                                                                                                                                                                                                                                                                                                                                                                                                                                                                                            | average June temperature                                                                                                                                                                                                                                                                                                                                                                                                                                                                                                    | °C                                      | 21.70(17.85,25.45)                  | 9.38%  |                 | Monthly average                                                             | MetaSUB                                                                           | <a href="https://pangea.io">Pangea (pangea.io)</a>                          |
|                             | urban-rural temperature difference day                                                                                                                                                                                                                                                                                                                                                                                                                                                                                                                                                      | The difference (in degrees Celsius) in average summer daytime maximum land surface temperature between the urban area and buffer                                                                                                                                                                                                                                                                                                                                                                                            | °C                                      | 2.44(1.89,4.22)                     | 21.88% | 2013            | summer daily average                                                        | Kaggle                                                                            | <a href="https://www.kaggle.com">https://www.kaggle.com</a>                 |
|                             | urban-rural temperature difference night                                                                                                                                                                                                                                                                                                                                                                                                                                                                                                                                                    | The difference (in degrees Celsius) in average summer nighttime minimum land surface temperature between the urban area and buffer                                                                                                                                                                                                                                                                                                                                                                                          | °C                                      | 0.93(0.46,1.37)                     | 21.88% | 2013            | summer daily average                                                        | Kaggle                                                                            | <a href="https://www.kaggle.com">https://www.kaggle.com</a>                 |
| demographic data            | city population                                                                                                                                                                                                                                                                                                                                                                                                                                                                                                                                                                             | total population in the city                                                                                                                                                                                                                                                                                                                                                                                                                                                                                                | per ten thousand                        | 16.248545(6.0535875,7.431022367282) | 0.00%  |                 |                                                                             | MetaSUB                                                                           | <a href="https://pangea.io">Pangea (pangea.io)</a>                          |
|                             | population density                                                                                                                                                                                                                                                                                                                                                                                                                                                                                                                                                                          | population density in the city                                                                                                                                                                                                                                                                                                                                                                                                                                                                                              | People per kilometer o                  | 4310(2236,7282)                     | 9.38%  |                 |                                                                             | MetaSUB                                                                           | <a href="https://pangea.io">Pangea (pangea.io)</a>                          |
|                             | Total antibiotic consumption                                                                                                                                                                                                                                                                                                                                                                                                                                                                                                                                                                | Global antibiotic consumption and usage in humans                                                                                                                                                                                                                                                                                                                                                                                                                                                                           | daily doses per 1,000 p                 | 18.49(12.075,25)                    | 0.00%  | 2016            |                                                                             | GRAM                                                                              | <a href="https://thegranms.world">https://thegranms.world</a>               |
| GDP per Capita              | GDP per Capita                                                                                                                                                                                                                                                                                                                                                                                                                                                                                                                                                                              | per thousand US dollar                                                                                                                                                                                                                                                                                                                                                                                                                                                                                                      | 41.048(20.6185,55.6272)                 | 3.13%                               | 2016   |                 | DBnomics                                                                    | <a href="https://thegranms.world">https://thegranms.world</a>                     |                                                                             |
| adjacent to coast           | Coastal cities are located on the interface or transition areas between land and sea, including large inland lakes.                                                                                                                                                                                                                                                                                                                                                                                                                                                                         |                                                                                                                                                                                                                                                                                                                                                                                                                                                                                                                             | 10(1)                                   | 0.00%                               |        |                 | MetaSUB                                                                     | <a href="https://pangea.io">Pangea (pangea.io)</a>                                |                                                                             |
| elevation                   | elevation above sea level                                                                                                                                                                                                                                                                                                                                                                                                                                                                                                                                                                   | meters                                                                                                                                                                                                                                                                                                                                                                                                                                                                                                                      | 96(11.75,414.75)                        | 0.00%                               |        |                 | MetaSUB                                                                     | <a href="https://pangea.io">Pangea (pangea.io)</a>                                |                                                                             |
| climate                     | 1: equatorial; 2: arid; 3: warm temperate; 4: snow 1=Tropical Evergreen Rain forest,Mangrove Forest;2=Tropical/Subtropical Evergreen Seasonal Broad leaved Forest;3=Temperate Evergreen Seasonal Broad leaved Forest;Summer Rain;4=Evergreen Broad leaved Sclerophyllous Forest, Winter Rain;5=Temperate/Subpolar Evergreen Needle leaved Forest;WithoutEvergreens;9=Xeromorphic Forest;Woodland;10=Evergreen Broad leaved Sclerophyllous Woodland;11=Tal/Medium/Short Grass land with 10-40% Woody Tree Cover;12=Tal/Medium/Short Grassland with Shrub Cover;13=Meadow, Short Grassland.No |                                                                                                                                                                                                                                                                                                                                                                                                                                                                                                                             |                                         | 0.00%                               | 2016   |                 | MetaSUB                                                                     | <a href="https://pangea.io">Pangea (pangea.io)</a>                                |                                                                             |
| others                      | vegetation type                                                                                                                                                                                                                                                                                                                                                                                                                                                                                                                                                                             | Forest;6=Tropical/Subtropical Drought-Deciduous Forest;7=Cold-Deciduous Forest;With Evergreens;8=Cold-Deciduous Forest;WithoutEvergreens;9=Xeromorphic Forest;Woodland;10=Evergreen Broad leaved Sclerophyllous Woodland;11=Tal/Medium/Short Grass land with 10-40% Woody Tree Cover;12=Tal/Medium/Short Grassland with Shrub Cover;13=Meadow, Short Grassland.No                                                                                                                                                           |                                         | 0.92(0.89,0.94)                     | 0.00%  | 2016            |                                                                             | EARTHDATA                                                                         | <a href="https://webmap.cornell.edu">https://webmap.cornell.edu</a>         |
|                             | greenness fraction                                                                                                                                                                                                                                                                                                                                                                                                                                                                                                                                                                          | Fraction of Vegetation Cover                                                                                                                                                                                                                                                                                                                                                                                                                                                                                                | %                                       | 0.92(0.89,0.94)                     | 0.00%  | 2016            |                                                                             | EARTHDATA                                                                         | <a href="https://giovanni.gsfc.nasa.gov">https://giovanni.gsfc.nasa.gov</a> |
|                             | soil type                                                                                                                                                                                                                                                                                                                                                                                                                                                                                                                                                                                   | 1=Alfisols; 2=Andisols; 3=Entisols; 4=Gelisols; 5=Inceptisols; 6=Mollisols; 7=Oxisols; 8=Scodosols; 9=Ultisols; 10=Vertisols                                                                                                                                                                                                                                                                                                                                                                                                |                                         |                                     | 0.00%  | 2015            | yearly                                                                      | USDA                                                                              | <a href="https://www.nrcs.usda.gov">https://www.nrcs.usda.gov</a>           |
|                             | fire carbon emissions                                                                                                                                                                                                                                                                                                                                                                                                                                                                                                                                                                       | fire carbon emissions.Biomass burning C emissions                                                                                                                                                                                                                                                                                                                                                                                                                                                                           | g C m <sup>-2</sup> month <sup>-1</sup> | 0(0,2.77)                           | 0.00%  | 2016            |                                                                             | EARTHDATA                                                                         | <a href="https://daac.cornell.gov/c">https://daac.cornell.gov/c</a>         |

**Supplementary Table 2.** Results of Spearman's rank correlation coefficient between environment and demographic characteristics

| env1                      | env2                      | spearman cor | spearman p  | cor         |             |
|---------------------------|---------------------------|--------------|-------------|-------------|-------------|
| city_ave_june_temp_c      | pm2.5                     | 0.622663184  | 5.07E-08    | 0.622663184 |             |
|                           | SOCD                      | -0.690598992 | 3.78E-10    | 0.690598992 |             |
|                           | TP                        | -0.597351407 | 2.36E-07    | 0.597351407 |             |
|                           | sol_organi                | -0.529434824 | 8.14E-06    | 0.529434824 |             |
|                           | soil_tmp.0.10cm.          | 0.621314704  | 5.52E-08    | 0.621314704 |             |
|                           | soil_tmp.10.40cm.         | 0.618749144  | 6.49E-08    | 0.618749144 |             |
|                           | standard deviation of mon | 0.574219788  | 8.63E-07    | 0.574219788 |             |
|                           | PCI                       | 0.502630572  | 2.69E-05    | 0.502630572 |             |
|                           | Vegetation_type.0.12.     | 0.513882004  | 1.65E-05    | 0.513882004 |             |
|                           | DIF                       | 0.680189575  | 8.71E-10    | 0.680189575 |             |
|                           | GHI                       | 0.54254766   | 4.36E-06    | 0.54254766  |             |
|                           | Uvindex                   | 0.552492154  | 2.67E-06    | 0.552492154 |             |
|                           | pet                       | 0.64138155   | 1.48E-08    | 0.64138155  |             |
|                           | vap                       | 0.610071956  | 1.11E-07    | 0.610071956 |             |
|                           | MAT                       | 0.659451922  | 4.17E-09    | 0.659451922 |             |
|                           | fire_carbon_emissions     | 0.58374964   | 5.12E-07    | 0.58374964  |             |
|                           | city_latitude             | lat          | 0.980930397 | 0           | 0.980930397 |
| june_CO                   |                           | 0.842482621  | 0           | 0.842482621 |             |
| june_UV                   |                           | -0.668499163 | 2.14E-09    | 0.668499163 |             |
| june_soil_tmp             |                           | -0.81022734  | 8.88E-16    | 0.81022734  |             |
| june_soil_mois            |                           | -0.703905749 | 1.23E-10    | 0.703905749 |             |
| june_vap                  |                           | -0.719478683 | 3.07E-11    | 0.719478683 |             |
| june_tmp                  |                           | -0.696520562 | 2.31E-10    | 0.696520562 |             |
| PERGDP                    |                           | 0.656202328  | 5.27E-09    | 0.656202328 |             |
| pm2.5                     |                           | -0.549651958 | 3.08E-06    | 0.549651958 |             |
| o3                        |                           | 0.595939964  | 2.57E-07    | 0.595939964 |             |
| no2                       |                           | 0.519723267  | 1.27E-05    | 0.519723267 |             |
| co                        |                           | 0.688343038  | 4.54E-10    | 0.688343038 |             |
| SOCD                      |                           | 0.853554545  | 0           | 0.853554545 |             |
| OC                        |                           | 0.78236993   | 3.69E-14    | 0.78236993  |             |
| TC                        |                           | 0.788450407  | 1.71E-14    | 0.788450407 |             |
| TP                        |                           | 0.841221273  | 0           | 0.841221273 |             |
| sol_organi                |                           | 0.817559806  | 4.44E-16    | 0.817559806 |             |
| soil_tmp.0.10cm.          |                           | -0.968692551 | 0           | 0.968692551 |             |
| soil_tmp.10.40cm.         |                           | -0.969545906 | 0           | 0.969545906 |             |
| pre_y                     |                           | -0.765122356 | 2.86E-13    | 0.765122356 |             |
| standard deviation of mon |                           | -0.914231645 | 0           | 0.914231645 |             |
| PCI                       |                           | -0.647443234 | 9.78E-09    | 0.647443234 |             |
| Vegetation_type.0.12.     |                           | -0.871420266 | 0           | 0.871420266 |             |
| Vegetation_type.1.5.      |                           | -0.65423724  | 6.07E-09    | 0.65423724  |             |
| DIF                       |                           | -0.904220199 | 0           | 0.904220199 |             |
| DNI                       |                           | -0.62271658  | 5.05E-08    | 0.62271658  |             |
| GHI                       |                           | -0.899459991 | 0           | 0.899459991 |             |
| Uvindex                   |                           | -0.98334698  | 0           | 0.98334698  |             |
| pet                       |                           | -0.88504727  | 0           | 0.88504727  |             |
| vap                       |                           | -0.958234106 | 0           | 0.958234106 |             |
| MAT                       |                           | -0.959464903 | 0           | 0.959464903 |             |
| fire_carbon_emissions     |                           | -0.865524197 | 0           | 0.865524197 |             |
| city_longitude            | june_pre                  | 0.802477925  | 2.66E-15    | 0.802477925 |             |
|                           | june_RH                   | 0.556829782  | 2.14E-06    | 0.556829782 |             |
|                           | june_wet                  | 0.513580641  | 1.67E-05    | 0.513580641 |             |
|                           | june_vap                  | 0.51458419   | 1.60E-05    | 0.51458419  |             |
|                           | PERGDP                    | -0.543858753 | 4.09E-06    | 0.543858753 |             |
|                           | city_total_population     | 0.535939213  | 5.99E-06    | 0.535939213 |             |
|                           | pm2.5                     | 0.523551555  | 1.07E-05    | 0.523551555 |             |
|                           | pre_y                     | 0.735815596  | 6.43E-12    | 0.735815596 |             |
|                           | standard deviation of mon | 0.519481902  | 1.28E-05    | 0.519481902 |             |
|                           | DIF                       | 0.638322755  | 1.82E-08    | 0.638322755 |             |
|                           | vap                       | 0.535592872  | 6.09E-06    | 0.535592872 |             |
|                           | fire_carbon_emissions     | 0.597466208  | 2.35E-07    | 0.597466208 |             |
|                           | city_population_density   | pm2.5        | 0.593479907 | 2.96E-07    | 0.593479907 |
|                           |                           | pm10         | 0.646637286 | 1.03E-08    | 0.646637286 |
| N_T_DIFF                  |                           | 0.583155455  | 5.30E-07    | 0.583155455 |             |
| R_Humidity_night          |                           | -0.513551194 | 1.67E-05    | 0.513551194 |             |
| city_total_population     | pm2.5                     | 0.69347514   | 2.98E-10    | 0.69347514  |             |
|                           | pm10                      | 0.604186955  | 1.58E-07    | 0.604186955 |             |
|                           | soil_moisture.0.10cm.     | 0.68871897   | 4.40E-10    | 0.68871897  |             |
|                           | soil_moisture.10.40cm.    | 0.727896029  | 1.39E-11    | 0.727896029 |             |
|                           | pre_y                     | 0.550070507  | 3.01E-06    | 0.550070507 |             |
|                           | DIF                       | 0.517508524  | 1.40E-05    | 0.517508524 |             |
| co                        | SOCD                      | 0.601948575  | 1.80E-07    | 0.601948575 |             |
|                           | OC                        | 0.597989199  | 2.28E-07    | 0.597989199 |             |
|                           | TC                        | 0.633399258  | 2.53E-08    | 0.633399258 |             |
|                           | TP                        | 0.576834544  | 7.49E-07    | 0.576834544 |             |
|                           | sol_organi                | 0.676960188  | 1.12E-09    | 0.676960188 |             |
|                           | soil_tmp.0.10cm.          | -0.664588016 | 2.86E-09    | 0.664588016 |             |
|                           | soil_tmp.10.40cm.         | -0.668046881 | 2.21E-09    | 0.668046881 |             |
|                           | PCI                       | -0.539643344 | 5.02E-06    | 0.539643344 |             |
|                           | Vegetation_type.0.12.     | -0.55147766  | 2.81E-06    | 0.55147766  |             |
|                           | Vegetation_type.1.5.      | -0.747759254 | 1.90E-12    | 0.747759254 |             |
|                           | DNI                       | -0.758659091 | 5.90E-13    | 0.758659091 |             |



|              |                           |              |          |             |
|--------------|---------------------------|--------------|----------|-------------|
|              | GHI                       | -0.772836434 | 1.17E-13 | 0.772836434 |
|              | Uvindex                   | -0.707597918 | 8.94E-11 | 0.707597918 |
|              | pet                       | -0.741580464 | 3.60E-12 | 0.741580464 |
|              | vap                       | -0.59133727  | 3.34E-07 | 0.59133727  |
|              | MAT                       | -0.654882042 | 5.79E-09 | 0.654882042 |
| coastal_city | PHH2O                     | -0.66640297  | 2.50E-09 | 0.66640297  |
|              | R_Humidity_day            | 0.505595003  | 2.37E-05 | 0.505595003 |
|              | GHI                       | 0.770879832  | 1.47E-13 | 0.770879832 |
|              | Uvindex                   | 0.910531129  | 0        | 0.910531129 |
| DIF          | pet                       | 0.792808825  | 9.77E-15 | 0.792808825 |
|              | vap                       | 0.958852672  | 0        | 0.958852672 |
|              | MAT                       | 0.93924428   | 0        | 0.93924428  |
|              | fire_carbon_emissions     | 0.893754154  | 0        | 0.893754154 |
|              | GHI                       | 0.868749978  | 0        | 0.868749978 |
|              | Uvindex                   | 0.670856545  | 1.79E-09 | 0.670856545 |
|              | wet                       | -0.753165504 | 1.07E-12 | 0.753165504 |
|              | pet                       | 0.827523966  | 0        | 0.827523966 |
| DNI          | R_Humidity_night          | -0.635359548 | 2.22E-08 | 0.635359548 |
|              | vap                       | 0.501895963  | 2.78E-05 | 0.501895963 |
|              | MAT                       | 0.623800568  | 4.72E-08 | 0.623800568 |
|              | Uvindex                   | 0.942397858  | 0        | 0.942397858 |
|              | pet                       | 0.983532375  | 0        | 0.983532375 |
| GHI          | vap                       | 0.847407187  | 0        | 0.847407187 |
|              | MAT                       | 0.91996633   | 0        | 0.91996633  |
|              | fire_carbon_emissions     | 0.746871438  | 2.09E-12 | 0.746871438 |
|              | june_soil_tmp             | -0.652544216 | 6.84E-09 | 0.652544216 |
|              | june_tmp                  | -0.519782396 | 1.27E-05 | 0.519782396 |
|              | o3                        | 0.718273606  | 3.43E-11 | 0.718273606 |
|              | no2                       | 0.579687321  | 6.41E-07 | 0.579687321 |
|              | co                        | 0.876028341  | 0        | 0.876028341 |
|              | SOCD                      | 0.771537854  | 1.36E-13 | 0.771537854 |
|              | OC                        | 0.669649197  | 1.96E-09 | 0.669649197 |
|              | TC                        | 0.795407346  | 6.88E-15 | 0.795407346 |
|              | TP                        | 0.707655881  | 8.89E-11 | 0.707655881 |
|              | sol_organ                 | 0.733688145  | 7.93E-12 | 0.733688145 |
|              | soil_tmp.0.10cm.          | -0.828488144 | 0        | 0.828488144 |
|              | soil_tmp.10.40cm.         | -0.830649545 | 0        | 0.830649545 |
| june_CO      | pre_y                     | -0.516677718 | 1.46E-05 | 0.516677718 |
|              | standard deviation of mon | -0.704071332 | 1.22E-10 | 0.704071332 |
|              | PCI                       | -0.560776823 | 1.75E-06 | 0.560776823 |
|              | Vegetation_type.0.12.     | -0.746066508 | 2.27E-12 | 0.746066508 |
|              | Vegetation_type.1.5.      | -0.67673219  | 1.14E-09 | 0.67673219  |
|              | DIF                       | -0.670890595 | 1.78E-09 | 0.670890595 |
|              | DNI                       | -0.62776225  | 3.66E-08 | 0.62776225  |
|              | GHI                       | -0.810680767 | 8.88E-16 | 0.810680767 |
|              | Uvindex                   | -0.851772562 | 0        | 0.851772562 |
|              | pet                       | -0.798019578 | 4.88E-15 | 0.798019578 |
|              | vap                       | -0.772434164 | 1.23E-13 | 0.772434164 |
|              | MAT                       | -0.804676612 | 1.78E-15 | 0.804676612 |
|              | fire_carbon_emissions     | -0.666197754 | 2.54E-09 | 0.666197754 |
|              | june_CO                   | 0.611525973  | 1.02E-07 | 0.611525973 |
|              | june_RH                   | -0.73950864  | 4.44E-12 | 0.73950864  |
|              | june_pet                  | 0.655213174  | 5.66E-09 | 0.655213174 |
|              | o3                        | 0.974682712  | 0        | 0.974682712 |
| june_O3      | PHH2O                     | 0.612638033  | 9.48E-08 | 0.612638033 |
|              | pre_y                     | -0.590326986 | 3.54E-07 | 0.590326986 |
|              | N_T_DIFF                  | 0.55350929   | 2.54E-06 | 0.55350929  |
|              | R_Humidity_night          | -0.711433123 | 6.37E-11 | 0.711433123 |
|              | R_Humidity_day            | -0.673469488 | 1.47E-09 | 0.673469488 |
|              | RH                        | -0.729252953 | 1.22E-11 | 0.729252953 |
|              | june_tmp                  | 0.583426167  | 5.22E-07 | 0.583426167 |
|              | city_ave_june_temp_c      | 0.567373407  | 1.24E-06 | 0.567373407 |
|              | o3                        | 0.600840374  | 1.93E-07 | 0.600840374 |
|              | PCI                       | 0.592382825  | 3.15E-07 | 0.592382825 |
|              | N_T_DIFF                  | 0.581759055  | 5.72E-07 | 0.581759055 |
| june_pet     | DNI                       | 0.519930864  | 1.26E-05 | 0.519930864 |
|              | wet                       | -0.744159386 | 2.77E-12 | 0.744159386 |
|              | R_Humidity_night          | -0.87222731  | 0        | 0.87222731  |
|              | R_Humidity_day            | -0.571964618 | 9.74E-07 | 0.571964618 |
|              | RH                        | -0.75307936  | 1.08E-12 | 0.75307936  |
|              | june_O3                   | -0.560516721 | 1.78E-06 | 0.560516721 |
|              | june_RH                   | 0.757099292  | 7.00E-13 | 0.757099292 |
|              | june_soil_mois            | 0.533469532  | 6.74E-06 | 0.533469532 |
|              | june_wet                  | 0.718247455  | 3.44E-11 | 0.718247455 |
|              | june_pet                  | -0.610727682 | 1.07E-07 | 0.610727682 |
|              | PERGDP                    | -0.51209828  | 1.79E-05 | 0.51209828  |
|              | city_total_population     | 0.58015149   | 6.25E-07 | 0.58015149  |
|              | o3                        | -0.589800551 | 3.65E-07 | 0.589800551 |
| june_pre     | PHH2O                     | -0.542986744 | 4.27E-06 | 0.542986744 |
|              | pre_y                     | 0.875593217  | 0        | 0.875593217 |
|              | standard deviation of mon | 0.551977841  | 2.74E-06 | 0.551977841 |
|              | oriVegetation_type.0.31.  | -0.548969316 | 3.18E-06 | 0.548969316 |
|              | DIF                       | 0.595172486  | 2.68E-07 | 0.595172486 |
|              | wet                       | 0.673049183  | 1.51E-09 | 0.673049183 |

|                           |                           |              |             |             |
|---------------------------|---------------------------|--------------|-------------|-------------|
|                           | R_Humidity_night          | 0.565995261  | 1.34E-06    | 0.565995261 |
|                           | RH                        | 0.556623877  | 2.17E-06    | 0.556623877 |
|                           | vap                       | 0.534318901  | 6.47E-06    | 0.534318901 |
|                           | fire_carbon_emissions     | 0.60323668   | 1.67E-07    | 0.60323668  |
| june_RH                   | june_wet                  | 0.555526551  | 2.29E-06    | 0.555526551 |
|                           | june_pet                  | -0.70513568  | 1.11E-10    | 0.70513568  |
|                           | o3                        | -0.66744588  | 2.31E-09    | 0.66744588  |
|                           | PHH2O                     | -0.568377047 | 1.18E-06    | 0.568377047 |
|                           | pre_y                     | 0.757736013  | 6.53E-13    | 0.757736013 |
|                           | N_T_DIFF                  | -0.598150679 | 2.26E-07    | 0.598150679 |
|                           | wet                       | 0.720236277  | 2.86E-11    | 0.720236277 |
|                           | R_Humidity_night          | 0.775423791  | 8.57E-14    | 0.775423791 |
|                           | R_Humidity_day            | 0.907618495  | 0           | 0.907618495 |
|                           | RH                        | 0.914590447  | 0           | 0.914590447 |
| june_soil_mois            | june_vap                  | 0.512177285  | 1.78E-05    | 0.512177285 |
|                           | PERGDP                    | -0.681364501 | 7.94E-10    | 0.681364501 |
|                           | city_total_population     | 0.760617026  | 4.75E-13    | 0.760617026 |
|                           | pm2.5                     | 0.618628467  | 6.54E-08    | 0.618628467 |
|                           | pm10                      | 0.507344811  | 2.20E-05    | 0.507344811 |
|                           | SOCD                      | -0.537949407 | 5.44E-06    | 0.537949407 |
|                           | OC                        | -0.547955491 | 3.35E-06    | 0.547955491 |
|                           | TP                        | -0.616504867 | 7.47E-08    | 0.616504867 |
|                           | sol_organ                 | -0.521970463 | 1.15E-05    | 0.521970463 |
|                           | soil_moisture.0.10cm.     | 0.874599568  | 0           | 0.874599568 |
|                           | soil_moisture.10.40cm.    | 0.924475929  | 0           | 0.924475929 |
|                           | soil_tmp.0.10cm.          | 0.634237724  | 2.39E-08    | 0.634237724 |
|                           | soil_tmp.10.40cm.         | 0.634082224  | 2.42E-08    | 0.634082224 |
|                           | pre_y                     | 0.635918147  | 2.14E-08    | 0.635918147 |
|                           | standard deviation of mon | 0.686224786  | 5.39E-10    | 0.686224786 |
|                           | Vegetation_type.0.12.     | 0.6746639    | 1.34E-09    | 0.6746639   |
|                           | DIF                       | 0.656818237  | 5.04E-09    | 0.656818237 |
|                           | GHI                       | 0.52649309   | 9.33E-06    | 0.52649309  |
|                           | Uvindex                   | 0.63811071   | 1.85E-08    | 0.63811071  |
|                           | june_soil_tmp             | vap          | 0.643750534 | 1.26E-08    |
| MAT                       |                           | 0.615588345  | 7.91E-08    | 0.615588345 |
| fire_carbon_emissions     |                           | 0.693105547  | 3.07E-10    | 0.693105547 |
| june_soil_mois            |                           | 0.507730265  | 2.16E-05    | 0.507730265 |
| june_vap                  |                           | 0.947695172  | 0           | 0.947695172 |
| june_tmp                  |                           | 0.972315957  | 0           | 0.972315957 |
| PERGDP                    |                           | -0.572655947 | 9.39E-07    | 0.572655947 |
| city_ave_june_temp_c      |                           | 0.834137077  | 0           | 0.834137077 |
| pm2.5                     |                           | 0.671240714  | 1.74E-09    | 0.671240714 |
| co                        |                           | -0.500852882 | 2.91E-05    | 0.500852882 |
| SOCD                      |                           | -0.910528531 | 0           | 0.910528531 |
| OC                        |                           | -0.784995427 | 2.66E-14    | 0.784995427 |
| TC                        |                           | -0.709543224 | 7.53E-11    | 0.709543224 |
| TP                        |                           | -0.840642717 | 0           | 0.840642717 |
| sol_organ                 |                           | -0.839118605 | 0           | 0.839118605 |
| soil_tmp.0.10cm.          |                           | 0.912325257  | 0           | 0.912325257 |
| soil_tmp.10.40cm.         |                           | 0.910891269  | 0           | 0.910891269 |
| pre_y                     |                           | 0.582585363  | 5.47E-07    | 0.582585363 |
| standard deviation of mon |                           | 0.878211273  | 0           | 0.878211273 |
| PCI                       |                           | 0.766913875  | 2.33E-13    | 0.766913875 |
| D_T_DIFF                  | 0.510779799               | 1.89E-05     | 0.510779799 |             |
| Vegetation_type.0.12.     | 0.780861325               | 4.44E-14     | 0.780861325 |             |
| DIF                       | 0.86478676                | 0            | 0.86478676  |             |
| DNI                       | 0.624770395               | 4.43E-08     | 0.624770395 |             |
| GHI                       | 0.873550186               | 0            | 0.873550186 |             |
| Uvindex                   | 0.88021584                | 0            | 0.88021584  |             |
| pet                       | 0.928150168               | 0            | 0.928150168 |             |
| vap                       | 0.865381614               | 0            | 0.865381614 |             |
| MAT                       | 0.922426553               | 0            | 0.922426553 |             |
| fire_carbon_emissions     | 0.838768174               | 0            | 0.838768174 |             |
| june_tmp                  | PERGDP                    | -0.530560432 | 7.72E-06    | 0.530560432 |
|                           | city_ave_june_temp_c      | 0.899537797  | 0           | 0.899537797 |
|                           | pm2.5                     | 0.708464295  | 8.28E-11    | 0.708464295 |
|                           | SOCD                      | -0.861472115 | 0           | 0.861472115 |
|                           | OC                        | -0.715702913 | 4.33E-11    | 0.715702913 |
|                           | TC                        | -0.617218676 | 7.14E-08    | 0.617218676 |
|                           | TP                        | -0.788317847 | 1.73E-14    | 0.788317847 |
|                           | sol_organ                 | -0.781406667 | 4.13E-14    | 0.781406667 |
|                           | soil_tmp.0.10cm.          | 0.8167481    | 4.44E-16    | 0.8167481   |
|                           | soil_tmp.10.40cm.         | 0.814601688  | 4.44E-16    | 0.814601688 |
|                           | standard deviation of mon | 0.802410495  | 2.66E-15    | 0.802410495 |
|                           | PCI                       | 0.760324289  | 4.91E-13    | 0.760324289 |
|                           | Vegetation_type.0.12.     | 0.701292145  | 1.54E-10    | 0.701292145 |
|                           | DIF                       | 0.809277808  | 8.88E-16    | 0.809277808 |
|                           | DNI                       | 0.562987577  | 1.56E-06    | 0.562987577 |
|                           | GHI                       | 0.797417845  | 5.33E-15    | 0.797417845 |
|                           | Uvindex                   | 0.782055172  | 3.82E-14    | 0.782055172 |
|                           | pet                       | 0.862687017  | 0           | 0.862687017 |
|                           | R_Humidity_night          | -0.510180704 | 1.94E-05    | 0.510180704 |
|                           | vap                       | 0.770873447  | 1.47E-13    | 0.770873447 |
| MAT                       | 0.841367669               | 0            | 0.841367669 |             |

|          |                           |              |          |             |
|----------|---------------------------|--------------|----------|-------------|
|          | fire_carbon_emissions     | 0.777088341  | 7.02E-14 | 0.777088341 |
|          | june_soil_tmp             | 0.955509936  | 0        | 0.955509936 |
|          | june_pet                  | 0.629350614  | 3.30E-08 | 0.629350614 |
|          | june_vap                  | 0.921469663  | 0        | 0.921469663 |
|          | june_tmp                  | 0.971166822  | 0        | 0.971166822 |
|          | city_ave_june_temp_c      | 0.849883515  | 0        | 0.849883515 |
|          | pm2.5                     | 0.631644998  | 2.84E-08 | 0.631644998 |
|          | SOCD                      | -0.808957427 | 8.88E-16 | 0.808957427 |
|          | OC                        | -0.720160249 | 2.88E-11 | 0.720160249 |
|          | TC                        | -0.599952637 | 2.03E-07 | 0.599952637 |
|          | TP                        | -0.746436775 | 2.19E-12 | 0.746436775 |
|          | sol_organ                 | -0.803791711 | 2.22E-15 | 0.803791711 |
|          | soil_tmp.0.10cm.          | 0.795852401  | 6.44E-15 | 0.795852401 |
| june_UV  | soil_tmp.10.40cm.         | 0.793767922  | 8.44E-15 | 0.793767922 |
|          | standard deviation of mon | 0.774930919  | 9.10E-14 | 0.774930919 |
|          | PCI                       | 0.794330328  | 7.99E-15 | 0.794330328 |
|          | Vegetation_type.0.12.     | 0.672852858  | 1.54E-09 | 0.672852858 |
|          | DIF                       | 0.747538313  | 1.95E-12 | 0.747538313 |
|          | DNI                       | 0.631425049  | 2.88E-08 | 0.631425049 |
|          | GHI                       | 0.815544891  | 4.44E-16 | 0.815544891 |
|          | Uvindex                   | 0.770049178  | 1.62E-13 | 0.770049178 |
|          | pet                       | 0.869366773  | 0        | 0.869366773 |
|          | R_Humidity_night          | -0.568417204 | 1.18E-06 | 0.568417204 |
|          | vap                       | 0.741945899  | 3.47E-12 | 0.741945899 |
|          | MAT                       | 0.817433208  | 4.44E-16 | 0.817433208 |
|          | fire_carbon_emissions     | 0.723198866  | 2.17E-11 | 0.723198866 |
|          | june_tmp                  | 0.960841009  | 0        | 0.960841009 |
|          | PERGDP                    | -0.670223498 | 1.88E-09 | 0.670223498 |
|          | city_ave_june_temp_c      | 0.889642075  | 0        | 0.889642075 |
|          | pm2.5                     | 0.780871648  | 4.44E-14 | 0.780871648 |
|          | SOCD                      | -0.831213897 | 0        | 0.831213897 |
|          | OC                        | -0.633241082 | 2.56E-08 | 0.633241082 |
|          | TC                        | -0.556732775 | 2.16E-06 | 0.556732775 |
|          | TP                        | -0.74537292  | 2.44E-12 | 0.74537292  |
|          | sol_organ                 | -0.703470677 | 1.28E-10 | 0.703470677 |
|          | soil_tmp.0.10cm.          | 0.830333535  | 0        | 0.830333535 |
| june_vap | soil_tmp.10.40cm.         | 0.827929549  | 0        | 0.827929549 |
|          | pre_y                     | 0.645475004  | 1.12E-08 | 0.645475004 |
|          | standard deviation of mon | 0.835431073  | 0        | 0.835431073 |
|          | PCI                       | 0.623991596  | 4.66E-08 | 0.623991596 |
|          | Vegetation_type.0.12.     | 0.705646642  | 1.06E-10 | 0.705646642 |
|          | DIF                       | 0.890014888  | 0        | 0.890014888 |
|          | GHI                       | 0.721065033  | 2.65E-11 | 0.721065033 |
|          | Uvindex                   | 0.783833004  | 3.06E-14 | 0.783833004 |
|          | pet                       | 0.787227399  | 2.00E-14 | 0.787227399 |
|          | vap                       | 0.829030474  | 0        | 0.829030474 |
|          | MAT                       | 0.854805104  | 0        | 0.854805104 |
|          | fire_carbon_emissions     | 0.831505236  | 0        | 0.831505236 |
|          | june_pet                  | -0.697282064 | 2.17E-10 | 0.697282064 |
|          | co                        | 0.588052809  | 4.03E-07 | 0.588052809 |
|          | OC                        | 0.534952024  | 6.28E-06 | 0.534952024 |
|          | sol_organ                 | 0.634388923  | 2.37E-08 | 0.634388923 |
|          | PCI                       | -0.656049503 | 5.33E-09 | 0.656049503 |
| june_wet | DNI                       | -0.818665176 | 2.22E-16 | 0.818665176 |
|          | GHI                       | -0.582856817 | 5.38E-07 | 0.582856817 |
|          | wet                       | 0.909805252  | 0        | 0.909805252 |
|          | pet                       | -0.555487816 | 2.30E-06 | 0.555487816 |
|          | R_Humidity_night          | 0.712824718  | 5.62E-11 | 0.712824718 |
|          | RH                        | 0.576638233  | 7.57E-07 | 0.576638233 |
|          | june_CO                   | 0.801236186  | 3.11E-15 | 0.801236186 |
|          | june_UV                   | -0.777053558 | 7.06E-14 | 0.777053558 |
|          | june_soil_tmp             | -0.892391562 | 0        | 0.892391562 |
|          | june_soil_mois            | -0.683939488 | 6.47E-10 | 0.683939488 |
|          | june_vap                  | -0.832063895 | 0        | 0.832063895 |
|          | june_tmp                  | -0.805631982 | 1.78E-15 | 0.805631982 |
|          | PERGDP                    | 0.693352965  | 3.01E-10 | 0.693352965 |
|          | city_ave_june_temp_c      | -0.58930301  | 3.75E-07 | 0.58930301  |
|          | pm2.5                     | -0.639077304 | 1.73E-08 | 0.639077304 |
|          | o3                        | 0.522907654  | 1.10E-05 | 0.522907654 |
|          | co                        | 0.619147928  | 6.33E-08 | 0.619147928 |
|          | SOCD                      | 0.891291255  | 0        | 0.891291255 |
|          | OC                        | 0.778125381  | 6.20E-14 | 0.778125381 |
|          | TC                        | 0.782590731  | 3.57E-14 | 0.782590731 |
|          | TP                        | 0.866968016  | 0        | 0.866968016 |
|          | sol_organ                 | 0.82983166   | 0        | 0.82983166  |
| lat      | soil_tmp.0.10cm.          | -0.988214879 | 0        | 0.988214879 |
|          | soil_tmp.10.40cm.         | -0.988233805 | 0        | 0.988233805 |
|          | pre_y                     | -0.780818467 | 4.44E-14 | 0.780818467 |
|          | standard deviation of mon | -0.950423386 | 0        | 0.950423386 |
|          | PCI                       | -0.682067361 | 7.51E-10 | 0.682067361 |
|          | D_T_DIFF                  | -0.502432916 | 2.72E-05 | 0.502432916 |
|          | Vegetation_type.0.12.     | -0.886432841 | 0        | 0.886432841 |
|          | Vegetation_type.1.5.      | -0.593048941 | 3.03E-07 | 0.593048941 |
|          | DIF                       | -0.951731893 | 0        | 0.951731893 |

|                           |                           |                       |              |             |             |
|---------------------------|---------------------------|-----------------------|--------------|-------------|-------------|
|                           | DNI                       | -0.592390441          | 3.15E-07     | 0.592390441 |             |
|                           | GHI                       | -0.905106531          | 0            | 0.905106531 |             |
|                           | Uvindex                   | -0.990295144          | 0            | 0.990295144 |             |
|                           | pet                       | -0.909524688          | 0            | 0.909524688 |             |
|                           | vap                       | -0.978591624          | 0            | 0.978591624 |             |
|                           | MAT                       | -0.986032604          | 0            | 0.986032604 |             |
|                           | fire_carbon_emissions     | -0.907289551          | 0            | 0.907289551 |             |
| MAT                       | fire_carbon_emissions     | 0.87735727            | 0            | 0.87735727  |             |
| N_T_DIFF                  | R_Humidity_night          | -0.692201828          | 3.31E-10     | 0.692201828 |             |
|                           | R_Humidity_day            | -0.628265079          | 3.54E-08     | 0.628265079 |             |
|                           | RH                        | -0.692648382          | 3.19E-10     | 0.692648382 |             |
| no2                       | co                        | 0.607193066           | 1.32E-07     | 0.607193066 |             |
|                           | OC                        | 0.50183951            | 2.79E-05     | 0.50183951  |             |
|                           | TC                        | 0.612111266           | 9.79E-08     | 0.612111266 |             |
|                           | soil_tmp.0.10cm.          | -0.506183116          | 2.31E-05     | 0.506183116 |             |
|                           | soil_tmp.10.40cm.         | -0.510424298          | 1.92E-05     | 0.510424298 |             |
|                           | DNI                       | -0.515984594          | 1.50E-05     | 0.515984594 |             |
|                           | GHI                       | -0.526610958          | 9.28E-06     | 0.526610958 |             |
|                           | Uvindex                   | -0.524399638          | 1.03E-05     | 0.524399638 |             |
|                           | pet                       | -0.54544833           | 3.79E-06     | 0.54544833  |             |
| o3                        | co                        | 0.552321056           | 2.69E-06     | 0.552321056 |             |
|                           | PHH2O                     | 0.593344965           | 2.98E-07     | 0.593344965 |             |
|                           | TC                        | 0.521664753           | 1.16E-05     | 0.521664753 |             |
|                           | soil_tmp.0.10cm.          | -0.51004694           | 1.95E-05     | 0.51004694  |             |
|                           | soil_tmp.10.40cm.         | -0.513816381          | 1.66E-05     | 0.513816381 |             |
|                           | pre_y                     | -0.630095232          | 3.14E-08     | 0.630095232 |             |
|                           | Vegetation_type.0.12.     | -0.504862986          | 2.45E-05     | 0.504862986 |             |
|                           | Vegetation_type.1.5.      | -0.537758594          | 5.49E-06     | 0.537758594 |             |
|                           | Uvindex                   | -0.53999187           | 4.94E-06     | 0.53999187  |             |
|                           | R_Humidity_night          | -0.616956265          | 7.26E-08     | 0.616956265 |             |
|                           | R_Humidity_day            | -0.556997322          | 2.13E-06     | 0.556997322 |             |
|                           | RH                        | -0.610085862          | 1.11E-07     | 0.610085862 |             |
|                           | vap                       | -0.565504778          | 1.37E-06     | 0.565504778 |             |
| OC                        | TC                        | 0.835393888           | 0            | 0.835393888 |             |
|                           | TP                        | 0.818755301           | 2.22E-16     | 0.818755301 |             |
|                           | sol_organ                 | 0.894862782           | 0            | 0.894862782 |             |
|                           | soil_tmp.0.10cm.          | -0.801026708          | 3.11E-15     | 0.801026708 |             |
|                           | soil_tmp.10.40cm.         | -0.800502765          | 3.55E-15     | 0.800502765 |             |
|                           | standard deviation of mon | -0.756749117          | 7.27E-13     | 0.756749117 |             |
|                           | PCI                       | -0.862053665          | 0            | 0.862053665 |             |
|                           | Vegetation_type.0.12.     | -0.766232843          | 2.52E-13     | 0.766232843 |             |
|                           | Vegetation_type.1.5.      | -0.555763419          | 2.26E-06     | 0.555763419 |             |
|                           | DIF                       | -0.622199582          | 5.22E-08     | 0.622199582 |             |
|                           | DNI                       | -0.782325604          | 3.69E-14     | 0.782325604 |             |
|                           | GHI                       | -0.868905227          | 0            | 0.868905227 |             |
|                           | Uvindex                   | -0.804317584          | 2.00E-15     | 0.804317584 |             |
|                           | wet                       | 0.547785097           | 3.37E-06     | 0.547785097 |             |
|                           | pet                       | -0.887111223          | 0            | 0.887111223 |             |
|                           | R_Humidity_night          | 0.518274978           | 1.36E-05     | 0.518274978 |             |
|                           | vap                       | -0.717931312          | 3.54E-11     | 0.717931312 |             |
|                           | MAT                       | -0.799544264          | 4.00E-15     | 0.799544264 |             |
|                           | fire_carbon_emissions     | -0.71712405           | 3.81E-11     | 0.71712405  |             |
|                           | oriVegetation_type        | Vegetation_type.0.12. | -0.567175626 | 1.26E-06    | 0.567175626 |
|                           | fire_carbon_emissions     | -0.516624212          | 1.46E-05     | 0.516624212 |             |
| PCI                       | Vegetation_type.0.12.     | 0.692149766           | 3.33E-10     | 0.692149766 |             |
|                           | DIF                       | 0.528379614           | 8.55E-06     | 0.528379614 |             |
|                           | DNI                       | 0.848329259           | 0            | 0.848329259 |             |
|                           | GHI                       | 0.860262716           | 0            | 0.860262716 |             |
|                           | Uvindex                   | 0.714027664           | 5.04E-11     | 0.714027664 |             |
|                           | wet                       | -0.698195242          | 2.01E-10     | 0.698195242 |             |
|                           | pet                       | 0.856542035           | 0            | 0.856542035 |             |
|                           | R_Humidity_night          | -0.68619091           | 5.40E-10     | 0.68619091  |             |
|                           | vap                       | 0.587422633           | 4.17E-07     | 0.587422633 |             |
|                           | MAT                       | 0.703342363           | 1.29E-10     | 0.703342363 |             |
|                           | fire_carbon_emissions     | 0.614155407           | 8.64E-08     | 0.614155407 |             |
|                           | PERGDP                    | city_total_population | -0.645743817 | 1.10E-08    | 0.645743817 |
| pm2.5                     |                           | -0.8428986            | 0            | 0.8428986   |             |
| pm10                      |                           | -0.668723357          | 2.10E-09     | 0.668723357 |             |
| SOCD                      |                           | 0.617037814           | 7.22E-08     | 0.617037814 |             |
| sol_organ                 |                           | 0.592234387           | 3.18E-07     | 0.592234387 |             |
| soil_tmp.0.10cm.          |                           | -0.655225463          | 5.65E-09     | 0.655225463 |             |
| soil_tmp.10.40cm.         |                           | -0.65286078           | 6.69E-09     | 0.65286078  |             |
| pre_y                     |                           | -0.647271941          | 9.90E-09     | 0.647271941 |             |
| standard deviation of mon |                           | -0.676332811          | 1.18E-09     | 0.676332811 |             |
| Vegetation_type.0.12.     |                           | -0.586848933          | 4.31E-07     | 0.586848933 |             |
| DIF                       |                           | -0.766159369          | 2.54E-13     | 0.766159369 |             |
| GHI                       |                           | -0.500943055          | 2.90E-05     | 0.500943055 |             |
| Uvindex                   |                           | -0.640138507          | 1.61E-08     | 0.640138507 |             |
| vap                       |                           | -0.690893424          | 3.69E-10     | 0.690893424 |             |
| MAT                       |                           | -0.655852243          | 5.41E-09     | 0.655852243 |             |
| fire_carbon_emissions     |                           | -0.741626518          | 3.59E-12     | 0.741626518 |             |
| pet                       |                           | vap                   | 0.86382055   | 0           | 0.86382055  |
|                           |                           | MAT                   | 0.938481359  | 0           | 0.938481359 |
|                           |                           | fire_carbon_emissions | 0.774655747  | 9.41E-14    | 0.774655747 |

|                                        |                           |              |             |             |
|----------------------------------------|---------------------------|--------------|-------------|-------------|
| PHH2O                                  | pre_y                     | -0.639051028 | 1.74E-08    | 0.639051028 |
|                                        | oriVegetation_type.0.31.  | 0.551954593  | 2.74E-06    | 0.551954593 |
|                                        | RH                        | -0.501548791 | 2.82E-05    | 0.501548791 |
| pm10                                   | SOCD                      | -0.588619648 | 3.90E-07    | 0.588619648 |
|                                        | sol_organ                 | -0.605162314 | 1.49E-07    | 0.605162314 |
| pm2.5                                  | pm10                      | 0.765208328  | 2.83E-13    | 0.765208328 |
|                                        | SOCD                      | -0.695113844 | 2.60E-10    | 0.695113844 |
|                                        | sol_organ                 | -0.607144704 | 1.32E-07    | 0.607144704 |
|                                        | soil_tmp.0.10cm.          | 0.593751612  | 2.91E-07    | 0.593751612 |
|                                        | soil_tmp.10.40cm.         | 0.590720841  | 3.46E-07    | 0.590720841 |
|                                        | standard deviation of mon | 0.656380424  | 5.20E-09    | 0.656380424 |
|                                        | Vegetation_type.0.12.     | 0.553385814  | 2.55E-06    | 0.553385814 |
|                                        | DIF                       | 0.72572934   | 1.71E-11    | 0.72572934  |
|                                        | Uvindex                   | 0.568983196  | 1.14E-06    | 0.568983196 |
|                                        | pet                       | 0.517576894  | 1.40E-05    | 0.517576894 |
|                                        | vap                       | 0.591169304  | 3.37E-07    | 0.591169304 |
|                                        | MAT                       | 0.613830368  | 8.81E-08    | 0.613830368 |
| pre_y                                  | fire_carbon_emissions     | 0.692746422  | 3.17E-10    | 0.692746422 |
|                                        | standard deviation of mon | 0.799160473  | 4.00E-15    | 0.799160473 |
|                                        | D_T_DIFF                  | 0.536303145  | 5.89E-06    | 0.536303145 |
|                                        | oriVegetation_type.0.31.  | -0.58628383  | 4.45E-07    | 0.58628383  |
|                                        | Vegetation_type.0.12.     | 0.648843129  | 8.87E-09    | 0.648843129 |
|                                        | DIF                       | 0.85126427   | 0           | 0.85126427  |
|                                        | Uvindex                   | 0.71733189   | 3.74E-11    | 0.71733189  |
|                                        | R_Humidity_day            | 0.543328501  | 4.20E-06    | 0.543328501 |
|                                        | vap                       | 0.824971844  | 0           | 0.824971844 |
|                                        | MAT                       | 0.726424225  | 1.60E-11    | 0.726424225 |
|                                        | fire_carbon_emissions     | 0.782111914  | 3.80E-14    | 0.782111914 |
|                                        | R_Humidity_day            | RH           | 0.949892942 | 0           |
| R_Humidity_night                       | R_Humidity_day            | 0.724646849  | 1.89E-11    | 0.724646849 |
|                                        | RH                        | 0.896002076  | 0           | 0.896002076 |
| standard deviation of monthly precipit | PCI                       | 0.714882721  | 4.67E-11    | 0.714882721 |
|                                        | D_T_DIFF                  | 0.543141482  | 4.24E-06    | 0.543141482 |
|                                        | oriVegetation_type.0.31.  | -0.557324755 | 2.09E-06    | 0.557324755 |
|                                        | Vegetation_type.0.12.     | 0.885484155  | 0           | 0.885484155 |
|                                        | DIF                       | 0.90358013   | 0           | 0.90358013  |
|                                        | DNI                       | 0.531379525  | 7.43E-06    | 0.531379525 |
|                                        | GHI                       | 0.834633703  | 0           | 0.834633703 |
|                                        | Uvindex                   | 0.922249348  | 0           | 0.922249348 |
|                                        | pet                       | 0.849758349  | 0           | 0.849758349 |
|                                        | vap                       | 0.917886778  | 0           | 0.917886778 |
|                                        | MAT                       | 0.922587175  | 0           | 0.922587175 |
|                                        | fire_carbon_emissions     | 0.925630979  | 0           | 0.925630979 |
| SOCD                                   | OC                        | 0.820836975  | 2.22E-16    | 0.820836975 |
|                                        | TC                        | 0.775123675  | 8.90E-14    | 0.775123675 |
|                                        | TP                        | 0.817622384  | 4.44E-16    | 0.817622384 |
|                                        | sol_organ                 | 0.865910056  | 0           | 0.865910056 |
|                                        | soil_tmp.0.10cm.          | -0.913697849 | 0           | 0.913697849 |
|                                        | soil_tmp.10.40cm.         | -0.911749543 | 0           | 0.911749543 |
|                                        | pre_y                     | -0.56031221  | 1.79E-06    | 0.56031221  |
|                                        | standard deviation of mon | -0.864390063 | 0           | 0.864390063 |
|                                        | PCI                       | -0.753610718 | 1.02E-12    | 0.753610718 |
|                                        | Vegetation_type.0.12.     | -0.825385787 | 0           | 0.825385787 |
|                                        | Vegetation_type.1.5.      | -0.522977457 | 1.10E-05    | 0.522977457 |
|                                        | DIF                       | -0.841000081 | 0           | 0.841000081 |
|                                        | DNI                       | -0.635257095 | 2.24E-08    | 0.635257095 |
|                                        | GHI                       | -0.875737571 | 0           | 0.875737571 |
|                                        | Uvindex                   | -0.890258389 | 0           | 0.890258389 |
|                                        | pet                       | -0.911103708 | 0           | 0.911103708 |
|                                        | vap                       | -0.85444187  | 0           | 0.85444187  |
|                                        | MAT                       | -0.913613043 | 0           | 0.913613043 |
| fire_carbon_emissions                  | -0.815159063              | 4.44E-16     | 0.815159063 |             |
| soil_moisture.0.10cm.                  | soil_moisture.10.40cm.    | 0.988382524  | 0           | 0.988382524 |
| soil_moisture.10.40cm.                 | oriVegetation_type.0.31.  | -0.520372714 | 1.23E-05    | 0.520372714 |
| soil_tmp.0.10cm.                       | soil_tmp.10.40cm.         | 0.999929409  | 0           | 0.999929409 |
|                                        | pre_y                     | 0.737715438  | 5.32E-12    | 0.737715438 |
|                                        | standard deviation of mon | 0.933758129  | 0           | 0.933758129 |
|                                        | PCI                       | 0.698742599  | 1.92E-10    | 0.698742599 |
|                                        | D_T_DIFF                  | 0.503404955  | 2.61E-05    | 0.503404955 |
|                                        | Vegetation_type.0.12.     | 0.892588663  | 0           | 0.892588663 |
|                                        | Vegetation_type.1.5.      | 0.582322687  | 5.55E-07    | 0.582322687 |
|                                        | DIF                       | 0.928663559  | 0           | 0.928663559 |
|                                        | DNI                       | 0.634014981  | 2.43E-08    | 0.634014981 |
|                                        | GHI                       | 0.923747826  | 0           | 0.923747826 |
|                                        | Uvindex                   | 0.990278779  | 0           | 0.990278779 |
|                                        | pet                       | 0.936674383  | 0           | 0.936674383 |
| vap                                    | 0.979921075               | 0            | 0.979921075 |             |
| MAT                                    | 0.995709343               | 0            | 0.995709343 |             |
| fire_carbon_emissions                  | 0.881015123               | 0            | 0.881015123 |             |
| pre_y                                  | pre_y                     | 0.73786744   | 5.24E-12    | 0.73786744  |
|                                        | standard deviation of mon | 0.932843722  | 0           | 0.932843722 |
|                                        | PCI                       | 0.697460098  | 2.14E-10    | 0.697460098 |
|                                        | Vegetation_type.0.12.     | 0.892623736  | 0           | 0.892623736 |
|                                        | Vegetation_type.1.5.      | 0.586908172  | 4.29E-07    | 0.586908172 |

|                       |                           |              |             |             |
|-----------------------|---------------------------|--------------|-------------|-------------|
| soil_tmp.10.40cm.     | DIF                       | 0.927805051  | 0           | 0.927805051 |
|                       | DNI                       | 0.634318433  | 2.38E-08    | 0.634318433 |
|                       | GHI                       | 0.923799674  | 0           | 0.923799674 |
|                       | Uvindex                   | 0.990701464  | 0           | 0.990701464 |
|                       | pet                       | 0.936541588  | 0           | 0.936541588 |
|                       | vap                       | 0.980236851  | 0           | 0.980236851 |
|                       | MAT                       | 0.995678898  | 0           | 0.995678898 |
|                       | fire_carbon_emissions     | 0.880730164  | 0           | 0.880730164 |
| soil_type             | greenfraction             | 0.501431032  | 2.84E-05    | 0.501431032 |
| sol_organ             | soil_tmp.0.10cm.          | -0.850609959 | 0           | 0.850609959 |
|                       | soil_tmp.10.40cm.         | -0.849677057 | 0           | 0.849677057 |
|                       | standard deviation of mon | -0.767918802 | 2.07E-13    | 0.767918802 |
|                       | PCI                       | -0.885403634 | 0           | 0.885403634 |
|                       | Vegetation_type.0.12.     | -0.754139074 | 9.66E-13    | 0.754139074 |
|                       | Vegetation_type.1.5.      | -0.609653896 | 1.14E-07    | 0.609653896 |
|                       | DIF                       | -0.701430674 | 1.53E-10    | 0.701430674 |
|                       | DNI                       | -0.8434829   | 0           | 0.8434829   |
|                       | GHI                       | -0.945532698 | 0           | 0.945532698 |
|                       | Uvindex                   | -0.865353664 | 0           | 0.865353664 |
|                       | wet                       | 0.58879509   | 3.86E-07    | 0.58879509  |
|                       | pet                       | -0.93037887  | 0           | 0.93037887  |
|                       | R_Humidity_night          | 0.520077275  | 1.25E-05    | 0.520077275 |
|                       | vap                       | -0.760293037 | 4.92E-13    | 0.760293037 |
|                       | MAT                       | -0.85110882  | 0           | 0.85110882  |
|                       | fire_carbon_emissions     | -0.71715274  | 3.80E-11    | 0.71715274  |
| TC                    | TP                        | 0.873045367  | 0           | 0.873045367 |
|                       | sol_organ                 | 0.734632926  | 7.23E-12    | 0.734632926 |
|                       | soil_tmp.0.10cm.          | -0.800015387 | 3.55E-15    | 0.800015387 |
|                       | soil_tmp.10.40cm.         | -0.799371806 | 4.00E-15    | 0.799371806 |
|                       | pre_y                     | -0.501192576 | 2.87E-05    | 0.501192576 |
|                       | standard deviation of mon | -0.771058187 | 1.44E-13    | 0.771058187 |
|                       | PCI                       | -0.697278764 | 2.17E-10    | 0.697278764 |
|                       | Vegetation_type.0.12.     | -0.794172184 | 7.99E-15    | 0.794172184 |
|                       | Vegetation_type.1.5.      | -0.544650796 | 3.94E-06    | 0.544650796 |
|                       | DIF                       | -0.635886525 | 2.15E-08    | 0.635886525 |
|                       | DNI                       | -0.609810541 | 1.13E-07    | 0.609810541 |
|                       | GHI                       | -0.787563458 | 1.91E-14    | 0.787563458 |
|                       | Uvindex                   | -0.812888587 | 4.44E-16    | 0.812888587 |
|                       | pet                       | -0.813929421 | 4.44E-16    | 0.813929421 |
|                       | vap                       | -0.734137306 | 7.59E-12    | 0.734137306 |
|                       | MAT                       | -0.781776109 | 3.95E-14    | 0.781776109 |
| fire_carbon_emissions | -0.74110909               | 3.78E-12     | 0.74110909  |             |
| TP                    | sol_organ                 | 0.766675244  | 2.39E-13    | 0.766675244 |
|                       | soil_tmp.0.10cm.          | -0.86673004  | 0           | 0.86673004  |
|                       | soil_tmp.10.40cm.         | -0.865284421 | 0           | 0.865284421 |
|                       | pre_y                     | -0.570966755 | 1.03E-06    | 0.570966755 |
|                       | standard deviation of mon | -0.827308318 | 0           | 0.827308318 |
|                       | PCI                       | -0.710317199 | 7.03E-11    | 0.710317199 |
|                       | Vegetation_type.0.12.     | -0.850852882 | 0           | 0.850852882 |
|                       | DIF                       | -0.778913205 | 5.64E-14    | 0.778913205 |
|                       | DNI                       | -0.650349182 | 7.99E-09    | 0.650349182 |
|                       | GHI                       | -0.85814033  | 0           | 0.85814033  |
|                       | Uvindex                   | -0.8701323   | 0           | 0.8701323   |
|                       | pet                       | -0.882085022 | 0           | 0.882085022 |
|                       | vap                       | -0.813880254 | 4.44E-16    | 0.813880254 |
|                       | MAT                       | -0.865478532 | 0           | 0.865478532 |
|                       | fire_carbon_emissions     | -0.780461839 | 4.66E-14    | 0.780461839 |
|                       | Uvindex                   | pet          | 0.938594222 | 0           |
| vap                   |                           | 0.965738239  | 0           | 0.965738239 |
| MAT                   |                           | 0.985102159  | 0           | 0.985102159 |
| fire_carbon_emissions |                           | 0.869386824  | 0           | 0.869386824 |
| vap                   | MAT                       | 0.982492382  | 0           | 0.982492382 |
|                       | fire_carbon_emissions     | 0.88257808   | 0           | 0.88257808  |
| Vegetation_type.0.12. | DIF                       | 0.792114512  | 1.07E-14    | 0.792114512 |
|                       | DNI                       | 0.581241322  | 5.89E-07    | 0.581241322 |
|                       | GHI                       | 0.833406905  | 0           | 0.833406905 |
|                       | Uvindex                   | 0.886667318  | 0           | 0.886667318 |
|                       | pet                       | 0.832979328  | 0           | 0.832979328 |
|                       | vap                       | 0.869405173  | 0           | 0.869405173 |
|                       | MAT                       | 0.883904435  | 0           | 0.883904435 |
|                       | fire_carbon_emissions     | 0.808674038  | 1.11E-15    | 0.808674038 |
| Vegetation_type.1.5.  | DIF                       | 0.520849905  | 1.21E-05    | 0.520849905 |
|                       | GHI                       | 0.613130106  | 9.20E-08    | 0.613130106 |
|                       | Uvindex                   | 0.636748194  | 2.03E-08    | 0.636748194 |
|                       | pet                       | 0.596597807  | 2.47E-07    | 0.596597807 |
|                       | vap                       | 0.573635596  | 8.91E-07    | 0.573635596 |
|                       | MAT                       | 0.600669026  | 1.95E-07    | 0.600669026 |
| wet                   | R_Humidity_night          | 0.795488691  | 6.66E-15    | 0.795488691 |
|                       | R_Humidity_day            | 0.626146952  | 4.06E-08    | 0.626146952 |
|                       | RH                        | 0.770212488  | 1.59E-13    | 0.770212488 |

**Supplementary Table 3. Specific data of environment and demographic characteristics in 59 cities**

| metasub_data   |            |             |            |            |           |           |            |                                  |                                        |           |                    |
|----------------|------------|-------------|------------|------------|-----------|-----------|------------|----------------------------------|----------------------------------------|-----------|--------------------|
| city           | city_longi | city_latitu | coastal_ci | city_total | city_popu | city_land | city_ave_j | coastal                          | koppen_climate                         | elevation | continent          |
| Auckland       | 174.7667   | -36.8667    | 1          | 16.29      | 1500      | 1102      | 10.6       | ('coastal', 'coastal')           | marine_west_coast_climate              | 196       | oceania            |
| Baltimore      | -76.6122   | 39.29038    | 1          | 6.21       | 2919      | 210       | 25.8       | ('coastal', 'coastal')           | humid_subtropical_climate              | 150       | north_america      |
| Barcelona      | 2.15899    | 41.38879    | 1          | 16.21      | 16000     | 101       | 24.4       | ('coastal', 'coastal')           | hot-summer_mediterranean_climate       | 12        | europa             |
| Belfast        | -5.90167   | 54.61447    | 1          | NA         | NA        | NA        | NA         | ('low altitude', 'not_coastal')  | warm_summer_continental_climate        | 63        | europa             |
| Berlin         | 13.41053   | 52.52437    | 0          | 37.12      | 4200      | 891       | 19.4       | ('low altitude', 'not_coastal')  | warm_humid_continental_climate         | 34        | europa             |
| Birmingham     | -1.89589   | 52.47582    | 0          | NA         | NA        | NA        | NA         | ('low altitude', 'not_coastal')  | marine_west_coast_climate              | 140       | europa             |
| Bogota         | -74.0818   | 4.60971     | 0          | 80.81      | 4310      | 1587      | 16.1       | ('high altitude', 'not_coastal') | marine_west_coast_climate              | 2640      | south_america      |
| Bradford       | -1.76045   | 53.79797    | 0          | NA         | NA        | NA        | NA         | ('low altitude', 'not_coastal')  | marine_west_coast_climate              | 134       | europa             |
| Brisbane       | 153.0281   | -27.4679    | 1          | 24.08      | 148       | 15842     | 15.3       | ('coastal', 'coastal')           | humid_subtropical_climate              | 28        | oceania            |
| Bury           | -2.27879   | 53.59794    | 0          | NA         | NA        | NA        | NA         | ('low altitude', 'not_coastal')  | marine_west_coast_climate              | 304       | europa             |
| Denver         | -104.985   | 39.73915    | 0          | 6.00       | 1745      | 401       | 20.3       | ('high altitude', 'not_coastal') | tropical_and_subtropical_steppe_climat | 1600      | north_america      |
| Doha           | 51.52245   | 25.27932    | 1          | 13.51      | 10000     | 132       | 37.5       | ('coastal', 'coastal')           | hot_desert_climate                     | 10        | middle_east        |
| Eastbourne     | 0.267977   | 50.7727     | 1          | NA         | NA        | NA        | NA         | ('low altitude', 'not_coastal')  | marine_west_coast_climate              | 34        | europa             |
| Eden           | -2.7567    | 54.66394    | 0          | NA         | NA        | NA        | NA         | ('low altitude', 'not_coastal')  | marine_west_coast_climate              | 79        | europa             |
| Edinburgh      | -3.2023    | 55.95185    | 1          | NA         | NA        | NA        | NA         | ('low altitude', 'not_coastal')  | marine_west_coast_climate              | 47        | europa             |
| Fairbanks      | -147.716   | 64.83778    | 0          | 0.52       | 388       | 82        | invalid mu | ('low altitude', 'not_coastal')  | continental_subarctic_climate          | 136       | north_america      |
| Fukuoka        | 130.4198   | 33.60994    | 1          | NA         | NA        | NA        | NA         | ('low altitude', 'not_coastal')  | humid_subtropical_climate              | 8         | east_asia          |
| Hamilton       | 175.2833   | -37.7833    | 0          | 2.03       | 230       | 877       | 17.8       | ('low altitude', 'not_coastal')  | marine_west_coast_climate              | 95        | oceania            |
| Hanoi          | 105        | 21          | 0          | 75.88      | 2300      | 3329      | 29         | ('low altitude', 'not_coastal')  | humid_subtropical_climate              | 16        | east_asia          |
| Hong_Kong      | 114.1577   | 22.28552    | 1          | 74.53      | 6777      | 1108      | 30.3       | ('coastal', 'coastal')           | humid_subtropical_climate              | 957       | east_asia          |
| Honolulu       | -157.858   | 21.30694    | 1          | 3.37       | 2236      | 177.2     | 27.5       | ('coastal', 'coastal')           | tropical_rainforest_climate            | 6         | oceania            |
| Ilorin         | 4.54214    | 8.49664     | 0          | 7.78       | 1188      | 765       | 25.6       | ('low altitude', 'not_coastal')  | tropical_savanna_climate               | 310       | sub_saharan_africa |
| Islington      | -0.11661   | 51.55719    | 0          | NA         | NA        | NA        | NA         | ('low altitude', 'not_coastal')  | marine_west_coast_climate              | 34        | europa             |
| Jaywick        | 1.121304   | 51.77583    | 1          | NA         | NA        | NA        | NA         | ('low altitude', 'not_coastal')  | marine_west_coast_climate              | 18        | europa             |
| Kensington     | -0.19922   | 51.49879    | 0          | NA         | NA        | NA        | NA         | ('low altitude', 'not_coastal')  | marine_west_coast_climate              | 14        | europa             |
| Kuala_Lumpur   | 101.6865   | 3.1412      | 0          | 17.90      | 6891      | 243       | 29.7       | ('low altitude', 'not_coastal')  | tropical_rainforest_climate            | 66        | east_asia          |
| Kyiv           | 30.5238    | 50.45466    | 0          | 29.01      | 3299      | 839       | 23.9       | ('low altitude', 'not_coastal')  | warm_humid_continental_climate         | 179       | europa             |
| Lisbon         | -9.23083   | 38.75382    | 1          | 5.06       | 6458      | 100       | 23.9       | ('coastal', 'coastal')           | hot-summer_mediterranean_climate       | 2         | europa             |
| London         | -0.12574   | 51.50853    | 0          | 87.88      | 5590      | 1572      | 14.4       | ('low altitude', 'not_coastal')  | marine_west_coast_climate              | 11        | europa             |
| Marseille      | 5.45       | 43.25       | 1          | 8.70       | 3600      | NA        | 29         | ('coastal', 'coastal')           | hot-summer_mediterranean_climate       | 0         | europa             |
| Mexico_City    | 99         | 19          | 0          | 89.19      | 6000      | 1485      | 18         | ('high altitude', 'not_coastal') | oceanic_subtropical_highland_climate   | 2250      | north_america      |
| Minneapolis    | -93.2638   | 44.97997    | 0          | 3.83       | 2959      | 151       | 22.2       | ('low altitude', 'not_coastal')  | cold_semi_arid_climates                | 253       | north_america      |
| Montevideo     | -56.1882   | -34.9033    | 1          | 17.19      | 6726      | 201       | 12.2       | ('coastal', 'coastal')           | humid_subtropical_climate              | 43        | south_america      |
| Naples         | 14.24641   | 40.86531    | 1          | 9.67       | 8200      | 117       | 30.3       | ('coastal', 'coastal')           | hot-summer_mediterranean_climate       | 0.9144    | europa             |
| New_York_City  | -74.006    | 40.71427    | 1          | 86.23      | 11000     | 783.84    | 23.3       | ('coastal', 'coastal')           | humid_subtropical_climate              | 10        | north_america      |
| Newcastle      | -1.61239   | 54.97252    | 0          | NA         | NA        | NA        | NA         | ('low altitude', 'not_coastal')  | marine_west_coast_climate              | 56        | europa             |
| Offa           | 4          | 8           | 0          | 0.90       | NA        | NA        | NA         | ('low altitude', 'not_coastal')  | tropical_savanna_climate               | 435       | sub_saharan_africa |
| Oslo           | 10.74609   | 59.91273    | 1          | 6.73       | 1400      | 454       | 10         | ('coastal', 'coastal')           | warm_humid_continental_climate         | 22.9      | europa             |
| Paris          | 2.3488     | 48.85341    | 0          | 22.06      | 21000     | 105       | 19.7       | ('low altitude', 'not_coastal')  | marine_west_coast_climate              | 35        | europa             |
| Porto          | -8.61099   | 41.14961    | 1          | 2.38       | 5700      | 41.42     | 20.6       | ('coastal', 'coastal')           | warm-summer_mediterranean_climate      | 97        | europa             |
| Ribeirao_Preto | -47.8525   | -21.1692    | 0          | 7.03293    | NA        | NA        | NA         | ('low altitude', 'not_coastal')  | tropical_savanna_climate               | 520       | south_america      |
| Rio_De_Janeiro | -43.2075   | -22.9028    | 1          | 66.89      | 2705      | 1221      | 22.8       | ('coastal', 'coastal')           | tropical_savanna_climate               | 5         | south_america      |
| Sacramento     | -121.494   | 38.58157    | 0          | 4.66       | 1952      | 259       | 23.6       | ('low altitude', 'not_coastal')  | hot-summer_mediterranean_climate       | 9.1       | north_america      |
| San_Francisco  | -122.419   | 37.77493    | 1          | 8.84       | 7282      | 121       | 15.6       | ('coastal', 'coastal')           | warm-summer_mediterranean_climate      | 16        | north_america      |
| Santiago       | -70.6483   | -33.4569    | 0          | 63.10      | 9821      | 641       | 8.3        | ('low altitude', 'not_coastal')  | warm-summer_mediterranean_climate      | 570       | south_america      |
| Sao_Paulo      | -46.6361   | -23.5475    | 0          | 121.07     | 8959      | 1520      | 18.6       | ('low altitude', 'not_coastal')  | humid_subtropical_climate              | 760       | south_america      |
| Sendai         | 140.8667   | 38.25759    | 1          | 10.86      | 1380      | 786       | 22.2       | ('coastal', 'coastal')           | humid_subtropical_climate              | 1500      | east_asia          |
| Seoul          | 126.9784   | 37.566      | 0          | 98.39      | 16000     | 605       | 24.2       | ('low altitude', 'not_coastal')  | hot_humid_continental_climate          | 38        | east_asia          |
| Shanghai       | 121        | 31          | 1          | 241.83     | 3800      | 6341      | 24         | ('coastal', 'coastal')           | humid_subtropical_climate              | 4         | east_asia          |
| Singapore      | 103.8501   | 1.28967     | 1          | 57.92      | 7796      | 723.2     | 29.2       | ('coastal', 'coastal')           | tropical_rainforest_climate            | 163.63    | east_asia          |
| Sofia          | 23.33      | 42.7        | 0          | 12.38      | 2517      | 492       | 19         | ('low altitude', 'not_coastal')  | marine_west_coast_climate              | 500       | europa             |
| Stockholm      | 18.0649    | 59.33258    | 1          | 9.60       | 5100      | 188       | 13.1       | ('coastal', 'coastal')           | warm_humid_continental_climate         | 0         | europa             |
| Swansea        | -3.97798   | 51.60766    | 1          | NA         | NA        | NA        | NA         | ('low altitude', 'not_coastal')  | marine_west_coast_climate              | 65        | europa             |
| Sydney         | 151.2069   | -33.8839    | 1          | 48.23991   | NA        | NA        | NA         | ('low altitude', 'not_coastal')  | humid_subtropical_climate              | 19        | oceania            |
| Taipei         | 121.5319   | 25.04776    | 1          | 85.00      | 7500      | 1140      | 29.4       | ('coastal', 'coastal')           | humid_subtropical_climate              | 1120      | east_asia          |
| Tokyo          | 139.6917   | 35.6895     | 1          | 138.40     | 2662      | 2188      | 21.7       | ('coastal', 'coastal')           | humid_subtropical_climate              | 40        | east_asia          |
| Vienna         | 16.37208   | 48.20849    | 0          | 18.99      | 4326      | 395       | 25         | ('low altitude', 'not_coastal')  | warm_humid_continental_climate         | 151       | europa             |
| Yamaguchi      | 131        | 34          | 1          | 1.99       | 194       | 1023      | 21.8       | ('coastal', 'coastal')           | humid_subtropical_climate              | 157       | east_asia          |
| Zurich         | 8          | 47          | 0          | 4.09       | 4700      | 88        | 16         | ('low altitude', 'not_coastal')  | marine_west_coast_climate              | 408       | europa             |

| air pollution |       |          |       |          | soil    |            |           |            |            |           |           |           |          |          | precipitation |          |          |
|---------------|-------|----------|-------|----------|---------|------------|-----------|------------|------------|-----------|-----------|-----------|----------|----------|---------------|----------|----------|
| pm2.5         | pm10  | o3       | no2   | co       | soil ph | soil organ | soil type | soil organ | total carb | total pho | soil mois | soil mois | soil tmp | soil tmp | precipitat    | standard | PCI      |
| 5.92          | NA    | 29.75237 | NA    | 77.4585  | 53      | 16         | 2         | 90.9101    | 158.108    | 288.782   | 33.16413  | 98.88027  | 289.9782 | 289.6883 | 1235.589      | 29.45424 | 8.958421 |
| 8.634367      | NA    | 46.35755 | 24.1  | 135.4191 | 54      | 12         | 9         | 131.163    | 632.319    | 339.807   | 31.64492  | 95.37441  | 288.5561 | 288.4817 | 1052.284      | 33.37888 | 9.440136 |
| 12.53463      | 24.07 | 46.72474 | 39.19 | 133.546  | 52      | 4          | 5         | 144.465    | 306.841    | 558.631   | 30.56758  | 92.10003  | 292.6521 | 292.3382 | 610.6091      | 24.11573 | 10.04913 |
| 8.747455      | 18.81 | 42.34842 | 39.62 | 139.2156 | 56      | 52         | 2         | NA         | 374.045    | 657.657   | 36.77107  | 111.0223  | 282.3456 | 282.1012 | 816.6778      | 20.44689 | 9.022851 |
| 14.28546      | 23.16 | 41.18097 | 30.37 | 136.5262 | 63      | 5          | 5         | 195.008    | 229        | 600       | 30.80621  | 90.60998  | 283.2175 | 283.0398 | 639.0946      | 37.76426 | 12.17416 |
| 11.41867      | 16.19 | 41.2914  | 21.31 | 137.058  | 48      | 15         | 3         | 125.429    | 159.797    | 358.231   | 27.35114  | 82.25762  | 283.1523 | 283.0288 | 789.1153      | 28.8987  | 9.808593 |
| 31.84177      | NA    | NA       | NA    | NA       | 53      | 37         | 5         | 578.438    | 536.262    | 593.076   | 32.21507  | 97.41745  | 288.4642 | 288.2607 | 1154.113      | 48.55358 | 10.28021 |
| 10.75545      | NA    | 41.23973 | 46.09 | 137.5561 | 55      | 51         | 5         | 383.715    | 306.841    | 628.15    | 27.88105  | 83.31042  | 281.5027 | 281.3629 | 941.1478      | 29.19629 | 9.391934 |
| 4.317352      | 15.21 | 27.51378 | 7.22  | 77.44507 | 52      | 2          | 1         | 79.3409    | 16.1114    | 273.516   | 31.27084  | 94.41352  | 297.1607 | 296.8447 | 1007.684      | 61.30471 | 12.40462 |
| 9.514265      | 15.24 | 41.17816 | 29.64 | 137.962  | 71      | 33         | 5         | 1509.88    | 1469.94    | 699.227   | 29.96403  | 89.82325  | 281.6786 | 281.5963 | 1093.541      | 23.38572 | 8.836398 |
| 6.732575      | 28.1  | NA       | 35    | NA       | 60      | 11         | 6         | 117.712    | 161.8      | 543.237   | 32.59021  | 94.67437  | 285.5186 | 285.0861 | 569.3694      | 39.0597  | 13.51014 |
| 88.76576      | NA    | 40.99329 | NA    | 131.1673 | 67      | NA         | 2         | 8.14391    | 179        | 20.8638   | NA        | NA        | NA       | NA       | 114.9563      | 23.51153 | 54.34725 |
| NA            | 17.77 | 42.54452 | 12.25 | 137.8284 | NA      | 14         | 9         | 281.828    | 299.443    | 553.929   | 26.05536  | 76.67504  | 284.3627 | 283.9353 | 890.9185      | 45.05923 | 11.14707 |
| 7.695349      | NA    | 41.40933 | NA    | 139.0737 | 56      | 16         | 5         | 724.14     | 337.032    | 669.511   | 28.42692  | 84.21126  | 279.9319 | 279.8132 | 865.2822      | 14.66384 | 8.64925  |
| 7.195759      | NA    | 41.28257 | NA    | 138.2953 | 59      | 27         | 1         | 366.662    | 127.104    | 359.321   | 29.19799  | 87.45593  | 281.226  | 281.0855 | 695.3277      | 24.76803 | 9.729047 |
| 2.814321      | 20.3  | NA       | NA    | NA       | 61      | 30         | 4         | 2791.69    | 1203       | 600       | 31.37672  | 86.86286  | 274.1582 | 273.5423 | 427.8569      | 32.05384 | 14.50718 |
| 16.89717      | NA    | 47.16202 | NA    | 141.6794 | 64      | 10         | 9         | 216.197    | 422.517    | 602.627   | 36.34372  | 109.7546  | 291.4178 | 291.2286 | 2062.322      | 122.7488 | 12.23019 |
| 6.210583      | NA    | 29.28088 | 20.33 | 76.84067 | 68      | 7          | 2         | 627        | 1639       | 1200      | 26.86048  | 79.3521   | 285.7114 | 285.8286 | 1148.033      | 25.32878 | 8.868775 |
| 34.32814      | NA    | 32.72764 | NA    | 135      | 69      | 9          | 9         | 160.502    | 203.813    | 502.403   | 28.01183  | 85.43351  | 295.2982 | 295.5908 | 1762.402      | 117.2809 | 13.20455 |
| 24.29226      | NA    | 34.78623 | NA    | 140.3887 | 71      | 2          | 5         | NA         | 72.8189    | 126.275   | 36.7523   | 111.7162  | 297.1714 | 297.019  | 273.027       | 153.2625 | 11.79001 |
| 4.327677      | NA    | 33.26465 | NA    | 124.4526 | 57      | NA         | 2         | 238.082    | 187.061    | 397.724   | 13.85191  | 43.96642  | 299.6734 | 299.4821 | 1183.149      | 87.1204  | 14.29755 |
| 50.94361      | NA    | NA       | NA    | NA       | 64      | 8          | 1         | 143.88     | 161.539    | 500       | 22.82504  | 79.09687  | 300.9563 | 300.7728 | 1153.835      | 82.60119 | 13.97072 |
| 13.61919      | NA    | 42.19747 | NA    | 136.9144 | 73      | 15         | 5         | 180.051    | 284.378    | 684.141   | 34.47322  | 103.8248  | 284.5433 | 284.4404 | 580.2217      | 27.05352 | 10.72473 |
| 11.52115      | NA    | 42.54354 | NA    | 137.9726 | 74      | 12         | 6         | 286.881    | 241.312    | 571.493   | 32.20112  | 95.82454  | 283.9348 | 283.525  | 506.5103      | 23.08927 | 10.61913 |
| 14.34161      | NA    | 42.24453 | NA    | 136.8804 | 74      | 16         | 5         | 181.732    | 278.731    | 669.416   | 29.72807  | 89.32845  | 284.3283 | 284.2015 | 675.4129      | 27.87901 | 10.20745 |
| 16.34169      | NA    | 28.88487 | NA    | 122.4258 | 57      | 8          | 9         | 187.512    | 250.692    | 591.371   | 32.42783  | 97.94821  | 302.4538 | 302.2772 | 2214.66       | 90.92601 | 10.18753 |
| 20.41958      | NA    | 41.2364  | NA    | 136.9443 | 71      | 11         | 3         | 134.961    | 92.6054    | 176.402   | 34.78909  | 104.3882  | 282.4948 | 282.1706 | 694.925       | 27.04355 | 9.999216 |
| 9.868903      | NA    | 46.3058  | NA    | 132.556  | 60      | 5          | 5         | 124.003    | 237.179    | 696.902   | 23.30039  | 68.42542  | 290.8766 | 290.5852 | 1762.402      | 117.2809 | 13.42947 |
| 13.20107      | NA    | 42.24426 | 9     | 136.906  | 76      | 15         | 5         | 180.051    | 284.378    | 684.141   | 34.47322  | 103.8248  | 284.5433 | 284.4404 | 765.2038      | 43.04587 | 11.81431 |
| 16.37748      | 26.35 | 45.59589 | 47.91 | 135.4467 | 63      | 15         | 5         | NA         | 385.175    | 319.019   | NA        | NA        | NA       | NA       | 438.6781      | 29.78267 | 13.40357 |
| 22.4388       | 38.72 | NA       | 27.86 | NA       | 71      | 9          | 9         | 183.766    | 247.412    | 578.428   | 28.50083  | 85.98047  | 298.6625 | 298.8337 | 1529.924      | 98.84367 | 12.92479 |
| 8.899737      | 18.55 | NA       | 11.6  | NA       | 73      | 27         | 6         | 496.673    | 203.878    | 548.547   | 33.00008  | 95.65216  | 283.1455 | 283.2427 | 923.1306      | 47.96821 | 11.30345 |
| 8.968233      | NA    | 29.67779 | NA    | 76.52531 | 63      | NA         | 10        | NA         | 213.001    | 531.571   | 38.30033  | 115.3581  | 292.6345 | 292.3603 | 945.4397      | 36.12123 | 9.93898  |
| 14.47263      | NA    | 47.74057 | NA    | 133.6686 | 72      | 3          | 2         | 313.662    | 1308.59    | 999.21    | 29.33875  | 88.11168  | 292.9548 | 292.5391 | 749.6649      | 36.16844 | 10.89379 |
| 7.588338      | NA    | 46.58686 | 25.77 | 136.7241 | 61      | 9          | 2         | 429.227    | 204.662    | 72.8318   | 29.71639  | 89.92212  | 287.7894 | 287.6951 | 1084.005      | 30.62376 | 9.211237 |
| 9.07397       | 11.36 | 41.55108 | 33.67 | 138.6507 | 67      | 16         | 5         | 238.253    | 253.978    | 684.904   | 29.12891  | 87.21948  | 282.5432 | 282.3005 | 604.8829      | 14.48579 | 8.964195 |
| 48.20771      | NA    | NA       | NA    | NA       | 66      | 7          | 1         | 129.88     | 114.51     | 233.501   | 25.04217  | 80.1934   | 300.341  | 300.2297 | 1333.472      | 72.64333 | 11.59783 |
| 9.140924      | 18.16 | 40.99335 | 40.37 | NA       | 67      | 15         | 8         | 489.062    | 689.429    | 696.284   | 31.02617  | 93.13898  | 278.1315 | 277.4636 | 699.2312      | 24.86432 | 9.72426  |
| 14.60426      | 28.12 | 41.69506 | 50.87 | 135.5395 | 75      | 7          | 1         | 217.208    | 300.529    | 500       | 31.51976  | 95.13284  | 285.9434 | 285.8336 | 694.1502      | 30.61197 | 10.47262 |
| 7.270323      | NA    | NA       | NA    | 135.1138 | 79      | 20         | 5         | 276.445    | 180.231    | 362.503   | 30.92475  | 93.26517  | 290.4659 | 290.2365 | 1227.174      | 74.13358 | 12.34764 |
| 12.73691      | NA    | NA       | NA    | NA       | 54      | 7          | 7         | 126        | 251        | 400       | 36.29412  | 112.8366  | 296.8531 | 296.8544 | 1076.225      | 91.86668 | 12.59346 |
| 11.09045      | NA    | 24.81399 | NA    | 86.24653 | 55      | NA         | 9         | 132.271    | 313        | 153.989   | 34.96167  | 105.3403  | 299.1643 | 298.9607 | 1456.321      | 40.78112 | 9.972862 |
| 7.282394      | 14.78 | 45.28757 | 9.6   | NA       | 60      | 15         | 3         | 160.363    | 230.976    | 407.68    | 33.67123  | 101.9616  | 291.9884 | 291.687  | 366.7219      | 35.89961 | 18.87474 |
| 7.570096      | 13.45 | 45.77112 | 15.8  | 137.2321 | 56      | 11         | 6         | 61.6371    | 100.371    | 322.1     | 29.6349   | 90.54553  | 289.0622 | 288.8569 | 688.8849      | 68.98143 | 19.36303 |
| 31.51672      | 66.83 | NA       | NA    | NA       | 69      | 6          | 3         | 92.9552    | 117.713    | 500       | 37.83977  | 113.7202  | 292.3132 | 291.8369 | 739.1345      | 95.14825 | 26.56168 |
| 15.18672      | 28.25 | 25.34104 | 39.62 | NA       | 56      | 12         | 7         | 228.506    | 251        | 400       | 39.0152   | 117.2837  | 295.7933 | 295.56   | 1362.399      | 85.36992 | 12.65244 |
| 9.781563      | NA    | 48.2279  | NA    | 140.9051 | 58      | 16         | 3         | 224.732    | 257.503    | 279.281   | 35.93136  | 107.6383  | 285.8088 | 285.6683 | 1213.225      | 70.52519 | 12.05039 |
| 29.74192      | 48    | 47.98453 | 58.28 | 143.8628 | 59      | 8          | 9         | 147        | 252        | 600       | 32.68848  | 98.41455  | 287.4654 | 287.2915 | 1279.491      | 101.5475 | 15.26211 |
| 39.73029      | NA    | 44.29701 | 43    | 144.2187 | 52      | 7          | 5         | 183.124    | 294.592    | 375.439   | 36.17943  | 109.9181  | 289.5909 | 289.213  | 1124.496      | 64.85015 | 11.9918  |
| 15.6741       | 26    | 27.98634 | 26    | 117.8192 | 49      | 0          | 9         | 669.416    | 187        | 150.29    | 31.81055  | 96.5025   | 301.9597 | 301.8229 | 2335.503      | 75.45221 | 9.481423 |
| 27.21036      | 33.52 | NA       | 22.98 | NA       | 55      | 13         | 1         | 339.733    | 229.805    | 505.444   | 31.43277  | 91.76753  | 283.0773 | 282.6148 | 751.6374      | 30.63074 | 10.16013 |
| 5.671827      | 20.3  | 41.77447 | 28.84 | 138.1528 | 64      | 13         | 10        | NA         | 175.288    | 613.504   | 25.7408   | 77.66463  | 280.6595 | 280.2724 | 524.5652      | 23.74119 | 10.58653 |
| 11.39012      | 19.14 | 42.17123 | 30.36 | 138.7446 | 55      | 24         | 9         | 517.595    | 397.822    | 607.941   | 34.984    | 105.0611  | 282.8994 | 282.8125 | 1064.757      | 26.5951  | 9.019603 |
| 7.591171      | 16.51 | 30.60954 | 14.69 | 77.48063 | 72      | NA         | 8         | 70.7604    | 63.7583    | 244.45    | 28.63895  | 86.90441  | 293.9237 | 293.6478 | 1455.634      | 119.8641 | 15.7921  |
| 14.68329      | NA    | 38.67941 | NA    | 140.9604 | 80      | 5          | 5         | 132.674    | 146.977    | 430.389   | 35.35589  | 106.7048  | 295.9476 | 295.7677 | 3266.951      | 99.82137 | 9.360296 |
| 16.53523      | NA    | 48.52045 | NA    | 139.4556 | 63      | 18         | 5         | 403.725    | 1140.12    | 909.106   | 32.59847  | 98.51215  | 291.3283 | 291.1169 | 1613          | 68.31003 | 10.30618 |
| 12.85594      | NA    | 41.58079 | NA    | NA       | 65      | 7          | 5         | 106.513    | 224.205    | 563.153   | 30.29791  | 89.07242  | 284.367  | 284.0782 | 751.8198      | 37.81973 | 11.1169  |
| 11.90298      | NA    | 47.54892 | NA    | 140.842  | 65      | 10         | 7         | 131.375    | 228        | 367.008   | NA        | NA        | NA       | NA       | 2091.289      | 104.4442 | 11.07701 |
| 11.36677      | 16.1  | NA       | 33.89 | NA       | 63      | 12         | 5         | 204.652    | 229.718    | 606.583   | 30.34869  | 90.72276  | 279.2103 | 278.7436 | 1363.273      | 66.68043 | 10.96496 |



| heat_island |          | vegetation |           |           | solar[kWh/m2] |           |           |          | vapor   |          |          |            |          | temperat | fire_carb | koppen   | GDP per  | main_cli |            |
|-------------|----------|------------|-----------|-----------|---------------|-----------|-----------|----------|---------|----------|----------|------------|----------|----------|-----------|----------|----------|----------|------------|
| urban-ru    | urban-ru | oriVegeta  | Vegetatio | green fra | Diffuse H     | Direct No | Global Hc | UVindex  | wet     | pet      | umidity  | n-humidity | RH       | vap      | ure       | on_emiss | climate2 | Capita   | mate       |
| 4.184655    | 0.468551 | 28         | 2         | 0.519568  | 1.76          | 3.64      | 3.902     | 5.888793 | 14.4942 | 2.375    | 84.32032 | 68.09767   | 76.20899 | 14.875   | 15.90833  | 0.159355 | 32       | 40.08    | warm       |
| 2.857058    | 0.568732 | 13         | 1         | 0.914581  | 1.712         | 4.227     | 4.15      | 4.448986 | 10.1775 | 3.083333 | 74.64064 | 52.37239   | 63.50652 | 11.88333 | 13.79167  | 0        | 31       | 58.021   | warm       |
| 2.459533    | 1.139082 | 11         | 1         | 0.934522  | 1.71          | 4.731     | 4.417     | 4.755525 | 7.8783  | 3.25     | 76.52345 | 67.71614   | 72.1198  | 13.375   | 17.06667  | 0        | 31       | 26.549   | warm       |
| 1.6008      | -0.28597 | 11         | 1         | 0.828645  | 1.535         | 1.874     | 2.464     | 2.205815 | 16.1017 | 1.441667 | 84.82293 | 72.91667   | 78.8698  | 10.56667 | 9.725     | 0        | 32       | 41.048   | warm       |
| 2.01991     | 1.347622 | 8          | 1         | 0.923127  | 1.533         | 2.628     | 2.901     | 2.332905 | 12.9800 | 2.125    | 76.20312 | 54.34245   | 65.27278 | 10.04167 | 10.51667  | 0        | 32       | 42.107   | warm       |
| 2.15158     | 0.7674   | 11         | 1         | 0.930289  | 1.551         | 2.145     | 2.646     | 2.445448 | 12.7300 | 1.558333 | 78.80469 | 53.39845   | 66.10157 | 10.70833 | 10.16667  | 0        | 32       | 41.048   | warm       |
| 3.034889    | -1.94599 | 1          | 1         | 0.937447  | 2.493         | 3.349     | 4.742     | 12.63003 | 14.9142 | 2.475    | NA       | NA         | NA       | 15.63333 | 16.21667  | 0.082524 | 32       | 5.87     | warm       |
| NA          | NA       | 1          | 1         | 0.931004  | 1.527         | 2.034     | 2.546     | 2.312082 | 14.2042 | 1.45     | 78.78126 | 55.13412   | 66.95769 | 10.05833 | 9.183333  | 0        | 32       | 41.048   | warm       |
| 2.307865    | -0.78131 | 11         | 1         | 0.383866  | 1.748         | 5.179     | 4.898     | 8.310615 | 9.6142  | 4.083333 | 80.11458 | 64.77864   | 72.44661 | 17.86667 | 21.26667  | 0.565361 | 31       | 49.971   | warm       |
| NA          | NA       | 11         | 1         | 0.932529  | 1.523         | 1.964     | 2.513     | 2.287064 | 15.5025 | 1.441667 | 80.56772 | 60.16276   | 70.36524 | 10.19167 | 9.366667  | 0.043612 | 32       | NA       | warm       |
| 4.955293    | 2.952912 | 28         | 2         | 0.897555  | 1.421         | 5.948     | 4.779     | 5.67031  | 7.7617  | 3.55     | NA       | NA         | NA       | 7.166667 | 10.225    | 0        | 26       | 58.021   | arid       |
| -0.31417    | 1.751693 | 30         | 3         | 0.21137   | 2.432         | 5.005     | 5.637     | 8.508491 | 1.1517  | 7.066667 | 49.43229 | 42.43229   | 45.93229 | 18.375   | 29.125    | 0        | 22       | 57.162   | arid       |
| NA          | NA       | NA         | NA        | 0.928909  | 1.573         | 2.895     | 3.139     | 3.016407 | 11.5950 | 1.775    | 81.90104 | 72.07291   | 76.98697 | 11.36667 | 10.39167  | 0        | 32       | 41.048   | warm       |
| NA          | NA       | 11         | 1         | 0.68456   | 1.529         | 2.057     | 2.551     | 2.186398 | 16.0133 | 1.366667 | 82.39584 | 63.77343   | 73.08464 | 9.816667 | 8.641667  | 0        | 32       | NA       | warm       |
| NA          | NA       | 11         | 1         | 0.921496  | 1.476         | 1.857     | 2.417     | 1.979346 | 15.4608 | 1.358333 | 83.98178 | 62.38933   | 73.18555 | 9.558333 | 8.333333  | 0        | 32       | 41.048   | warm       |
| 0.132727    | 1.334306 | 8          | 1         | 0.79016   | NA            | NA        | NA        | 1.883531 | 8.5883  | 1.45     | NA       | NA         | NA       | 5.866667 | 0.241667  | 0        | 43       | 58.021   | snow       |
| NA          | NA       | 5          | 1         | 0.935866  | 1.965         | 2.975     | 3.862     | 4.924561 | 15.7992 | 2.775    | 76.18229 | 61.49219   | 68.83724 | 15.96667 | 17.16667  | 0        | 31       | 39.4     | warm       |
| 1.180951    | 0.444378 | 28         | 2         | 0.974753  | 1.707         | 3.665     | 3.847     | 5.359426 | 13.7100 | 2.158333 | 84.72915 | 60.44662   | 72.58788 | 13.86667 | 14.51667  | 0        | 32       | 42.315   | warm       |
| 0.782574    | -0.03907 | 23         | 2         | 0.920142  | 2.251         | 1.886     | 3.677     | 7.417872 | 13.3817 | 3.141667 | 82.63542 | 59.95702   | 71.29622 | 21.84167 | 23.70833  | 16.97349 | 37       | 2.192    | warm       |
| NA          | NA       | 2          | 1         | 0.547892  | 2.268         | 2.268     | 3.889     | 7.258766 | 16.4717 | 3.125    | 82.52865 | 70.91406   | 76.72135 | 23.55    | 23.6      | 5.676851 | 37       | 43.731   | warm       |
| 7.061642    | 0.42833  | 13         | 1         | NA        | 2.005         | 5.435     | 5.698     | 10.12546 | 13.9192 | 3.775    | 80.26042 | 72.79947   | 76.52995 | 22.59167 | 23.8      | 0        | 32       | 58.021   | warm       |
| 2.562387    | 0.702586 | NA         | NA        | 0.889876  | 2.938         | 2.685     | 4.994     | 9.234736 | 8.9100  | 3.625    | NA       | NA         | NA       | 25.88333 | 27.23333  | 9.89105  | 14       | 2.176    | equatorial |
| NA          | NA       | 11         | 1         | 0.927833  | 1.569         | 2.363     | 2.792     | 2.62154  | 11.5850 | 1.666667 | 78.36197 | 54.69402   | 66.52799 | 10.94167 | 10.7      | 0.011737 | 32       | 41.048   | warm       |
| NA          | NA       | 11         | 1         | 0.900239  | 1.569         | 2.713     | 2.987     | 2.786788 | 14.2117 | 1.775    | 82.56772 | 71.44792   | 77.00782 | 11.19167 | 11.18333  | 0        | 32       | NA       | warm       |
| NA          | NA       | 11         | 1         | 0.927833  | 1.572         | 2.383     | 2.805     | 2.62154  | 11.5033 | 1.675    | 78.36197 | 54.69402   | 66.52799 | 10.875   | 10.51667  | 0        | 32       | 58.021   | warm       |
| 2.050255    | 0.952482 | 1          | 1         | 0.94104   | 2.607         | 2.482     | 4.543     | 10.63971 | 19.1267 | 3.166667 | 84.20313 | 68.52605   | 76.36459 | 28.91667 | 26.43333  | 3.306612 | 11       | 9.817    | equatorial |
| NA          | NA       | 8          | 1         | 0.893424  | 1.556         | 2.999     | 3.205     | 2.798255 | 10.8567 | 2.116667 | 76.71614 | 50.08996   | 63.403   | 9.783333 | 9.8       | 8.498328 | 42       | 2.187    | snow       |
| 2.640413    | 1.016044 | 13         | 1         | 0.740569  | 1.627         | 5.188     | 4.697     | 5.500316 | 10.5275 | 3.25     | 74.39584 | 67.78777   | 71.0918  | 14.275   | 17.775    | 5.120857 | 28       | 19.978   | arid       |
| NA          | NA       | 11         | 1         | 0.927833  | 1.57          | 2.368     | 2.799     | 2.62154  | 11.5850 | 1.666667 | 78.36197 | 54.69402   | 66.52799 | 10.94167 | 10.7      | 0.011737 | 32       | 41.048   | warm       |
| 7.395606    | -0.19155 | 13         | 1         | 0.947473  | 1.477         | 4.775     | 4.362     | 4.370143 | 10.5425 | 3.141667 | 75.4453  | 63.63803   | 69.54166 | 12.375   | 15.4      | 0        | 34       | 37.037   | warm       |
| 2.032664    | 1.667722 | 28         | 2         | 0.938623  | 2.402         | 3.7       | 4.984     | 9.367176 | 10.8575 | 3.475    | NA       | NA         | NA       | 25.24167 | 26.33333  | 183.7457 | 14       | NA       | equatorial |
| 0.196511    | 0.593673 | 11         | 1         | 0.796373  | 1.503         | 4.308     | 3.829     | 4.047702 | 10.8842 | 2.575    | NA       | NA         | NA       | 10.13333 | 9.408333  | 9.167905 | 41       | 58.021   | snow       |
| 4.343503    | 1.561933 | 10         | 1         | 0.929619  | 1.765         | 4.439     | 4.416     | 4.697157 | 9.6875  | 3.133333 | 76.50521 | 54.47656   | 65.49088 | 14.925   | 16.80833  | 0        | 31       | NA       | warm       |
| 1.970164    | 0.656775 | 11         | 1         | 0.88632   | 1.649         | 4.083     | 4.031     | 4.221608 | 10.4175 | 3.416667 | 74.80728 | 51.47266   | 63.13997 | 10.61667 | 17.15833  | 0.049683 | 34       | 30.939   | warm       |
| 1.538722    | 0.216821 | 10         | 1         | 0.929666  | 1.505         | 2.127     | 2.542     | 2.264145 | 14.4908 | 1.466667 | 82.375   | 63.72135   | 73.04818 | 9.883333 | 13.29167  | 0        | 31       | 58.021   | warm       |
| 2.640333    | 1.474924 | 11         | 1         | 0.929666  | 1.505         | 2.127     | 2.542     | 2.264145 | 14.4908 | 1.466667 | 82.375   | 63.72135   | 73.04818 | 9.883333 | 8.95      | 0        | 32       | 41.048   | warm       |
| 1.839292    | 0.552321 | 23         | 2         | 0.91236   | 2.931         | 2.399     | 4.76      | 8.998062 | 9.5567  | 3.4      | 84.16928 | NA         | NA       | 27.20833 | 27.31667  | 49.12289 | 14       | 2.176    | equatorial |
| 2.697417    | 1.423189 | 10         | 1         | 0.957     | 1.299         | 2.806     | 2.606     | 1.833417 | 14.3658 | 1.583333 | 84.10676 | 69.30598   | 76.70637 | 8.258333 | 6.525     | 0        | 42       | 70.46    | snow       |
| 4.873962    | 1.911203 | 11         | 1         | 0.912261  | 1.615         | 2.813     | 3.143     | 2.937564 | 13.7108 | 2.25     | 76.31252 | 50.30469   | 63.30861 | 10.95    | 12.49167  | 0        | 32       | 37.037   | warm       |
| NA          | NA       | 10         | 1         | 0.946279  | 1.576         | 4.779     | 4.368     | 4.837737 | 12.7958 | 2.28     | 76.18489 | 67.07812   | 71.63151 | 13.84167 | 15.85833  | 0        | 35       | 19.978   | warm       |
| 0.964597    | 1.020701 | 9          | 1         | 0.938802  | 2.035         | 4.928     | 5.31      | 8.862691 | 16.5267 | 3.225    | NA       | NA         | NA       | 20.38333 | 23.39167  | 26.03781 | 14       | 8.71     | equatorial |
| 4.440022    | 0.978752 | 8          | 1         | 0.950449  | 1.95          | 4.195     | 4.831     | 5.878001 | 14.7692 | 3.066667 | 80.75522 | 66.89843   | 73.82683 | 24.31667 | 24.34167  | 0.059769 | 12       | 8.71     | equatorial |
| 2.028352    | 1.140216 | 6          | 1         | 0.933378  | 1.317         | 6.511     | 5.206     | 5.694605 | 5.3167  | 4.125    | 60.68622 | 38.48959   | 49.5879  | 11.56667 | 17.21667  | 8.046167 | 34       | 58.021   | warm       |
| 1.985432    | 1.345567 | 12         | 1         | 0.951771  | 1.469         | 5.685     | 4.967     | 5.557291 | 5.8233  | 3.158333 | 70.86459 | 61.88152   | 66.37305 | 12.475   | 15.73333  | 0        | 35       | 58.021   | warm       |
| 5.019442    | 0.898588 | 10         | 1         | 0.913727  | 1.513         | 6.449     | 5.553     | 8.716774 | 3.0450  | 3.091667 | NA       | NA         | NA       | 11.34167 | 13.61667  | 0.394888 | 35       | 13.753   | warm       |
| 1.912663    | 1.194157 | 10         | 1         | 0.892943  | 2.077         | 3.822     | 4.627     | 4.01193  | 18.3517 | 2.725    | 83.57813 | 76.63542   | 80.10678 | 19.28333 | 20.49167  | 0        | 31       | 8.71     | warm       |
| 2.482641    | -0.39441 | 10         | 1         | 0.523805  | 1.864         | 2.967     | 3.593     | 4.150419 | 21.5175 | 2.141667 | 80.08072 | 59.54298   | 69.81185 | 11.15    | 11.04167  | 238.3903 | 31       | 39.4     | warm       |
| NA          | NA       | 10         | 1         | 0.878822  | 1.981         | 3.35      | 3.938     | 4.01142  | 8.6992  | 2.525    | 73.34897 | 57.03386   | 65.19141 | 12.54167 | 12.29167  | 2.770404 | 49       | 29.288   | snow       |
| 5.084159    | 0.904471 | 10         | 1         | 0.889943  | 2.134         | 2.299     | 3.673     | 5.259441 | 14.4833 | 2.558333 | 75.63282 | 61.79948   | 68.71615 | 17.59167 | 17.56667  | 628.9973 | 31       | NA       | warm       |
| 3.809336    | 2.303532 | 1          | 1         | 0.441317  | 2.546         | 2.549     | 4.509     | 10.31279 | 20.1842 | 3.466667 | 84.65104 | 68.29428   | 76.47266 | 30.36667 | 28.09167  | 0.151523 | 11       | 56.848   | equatorial |
| 5.60867     | 1.433815 | 10         | 1         | 0.892037  | 1.729         | 3.681     | 3.881     | 3.96226  | 7.9358  | 2.483333 | NA       | NA         | NA       | 9.166667 | 10.69167  | 0        | 32       | 7.548    | warm       |
| 2.427958    | 0.90023  | 11         | 1         | 0.950509  | 1.328         | 2.96      | 2.713     | 1.953063 | 12.8367 | 1.525    | 82.78124 | 69.48698   | 76.13411 | 9.116667 | 7.366667  | 0        | 32       | 51.965   | warm       |
| NA          | NA       | 11         | 1         | 0.93765   | 1.57          | 2.406     | 2.834     | 2.505962 | 15.2508 | 1.383333 | 82.89844 | 66.26563   | 74.58204 | 10.74167 | 9.558333  | 0        | 32       | 41.048   | warm       |
| NA          | NA       | 6          | 1         | 0.970126  | 1.616         | 4.853     | 4.487     | 6.681353 | 11.4542 | 3.583333 | 79.95052 | 63.2578    | 71.60416 | 15.15833 | 18.75     | 0.230876 | 31       | 49.971   | warm       |
| NA          | NA       | 2          | 1         | 0.924454  | 2.065         | 2.321     | 3.699     | 6.788987 | 18.7617 | 2.858333 | 79.89543 | 75.26302   | 77.57423 | 21.63333 | 21.14167  | 38.40085 | 31       | 22.54    | warm       |
| NA          | NA       | 10         | 1         | 0.922019  | 1.849         | 3.374     | 3.86      | 4.726744 | 17.0875 | 2.65     | 76.97915 | 57.3646    | 67.17187 | 14.20833 | 15.99167  | 0        | 31       | 39.4     | warm       |
| NA          | NA       | 10         | 1         | 0.887718  | 1.623         | 2.99      | 3.286     | 2.85837  | 13.8383 | 2.383333 | 78.37239 | 49.12565   | 63.74902 | 10.14167 | 11.34167  | 0        | 32       | 45.276   | warm       |
| NA          | NA       | 5          | 1         | 0.933258  | 1.967         | 2.933     | 3.842     | 4.957915 | 16.8083 | 2.625    | 77.3776  | 64.59114   |          |          |           |          |          |          |            |

**Supplementary Table 4. Specific data of environment and demographic characteristics 32 cities**

| city           | country    | anti | consum    | continent   | city       | longitud | city  | latitud | city   | total    | population | city     | population | tem    | elevation | meters | pm25 | pm10 | o3 | no2 |
|----------------|------------|------|-----------|-------------|------------|----------|-------|---------|--------|----------|------------|----------|------------|--------|-----------|--------|------|------|----|-----|
| Denver         | USA        | 25   | North_Am  | -104.9847   | 39.73915   | 6.00158  | 1745  | 20.3    | 1600   | 6.732575 | 28.1       | NA       | 35         |        |           |        |      |      |    |     |
| Stockholm      | Sweden     | 11.6 | Europe    | 18.0649     | 59.33258   | 9.60031  | 5100  | 13.1    | 0      | 5.671827 | 20.3       | 41.77447 | 28.84      |        |           |        |      |      |    |     |
| New_York_City  | USA        | 25   | North_Am  | -74.00597   | 40.71427   | 86.22698 | 11000 | 23.3    | 10     | 7.588338 | NA         | 46.58686 | 25.77      |        |           |        |      |      |    |     |
| Singapore      | Republic c | 12.8 | East_Asia | 103.85007   | 1.28967    | 57.91901 | 7796  | 29.2    | 163.63 | 15.6741  | 26         | 27.98634 | 26         |        |           |        |      |      |    |     |
| Baltimore      | USA        | 25   | North_Am  | -76.61219   | 39.29038   | 6.20961  | 2919  | 25.8    | 150    | 8.634367 | NA         | 46.35755 | 24.1       |        |           |        |      |      |    |     |
| Hanoi          | Vietnam    | 22.7 | East_Asia | 105         | 21         | 75.878   | 2300  | 29      | 16     | 34.32814 | NA         | 32.72764 | NA         |        |           |        |      |      |    |     |
| London         | England    | 20   | Europe    | -0.12574    | 51.50853   | 87.87892 | 5590  | 14.4    | 11     | 13.20107 | NA         | 42.24426 | 9          |        |           |        |      |      |    |     |
| Hong_Kong      | China      | 8.8  | East_Asia | 114.15769   | 22.28552   | 74.5323  | 6777  | 30.3    | 957    | 24.29226 | NA         | 34.78623 | NA         |        |           |        |      |      |    |     |
| Ilorin         | Nigeria    | 7.5  | Sub_Sahar | 4.54214     | 8.49664    | 7.77667  | 1188  | 25.6    | 310    | 50.94361 | NA         | NA       | NA         |        |           |        |      |      |    |     |
| Marseille      | France     | 29.2 | Europe    | 5.45        | 43.25      | 8.69815  | 3600  | 29      | 0      | 16.37748 | 26.35      | 45.59589 | 47.91      |        |           |        |      |      |    |     |
| Taipei         | Taiwan     | 19.8 | East_Asia | 121.53185   | 25.04776   | 85       | 7500  | 29.4    | 1120   | 14.68329 | NA         | 38.67941 | NA         |        |           |        |      |      |    |     |
| Oslo           | Norway     | 14.3 | Europe    | 10.74609    | 59.91273   | 6.73469  | 1400  | 10      | 22.9   | 9.140924 | 18.16      | 40.99335 | 40.37      |        |           |        |      |      |    |     |
| Kyiv           | Ukraine    | 12.2 | Europe    | 30.5238     | 50.45466   | 29.0092  | 3299  | 23.9    | 179    | 20.41958 | NA         | 41.2364  | NA         |        |           |        |      |      |    |     |
| Rio_De_Janeiro | Brazil     | 15.6 | South_Am  | -43.2075    | -22.90278  | 66.8893  | 2705  | 22.8    | 5      | 11.09045 | NA         | 24.81399 | NA         |        |           |        |      |      |    |     |
| Offa           | Nigeria    | 7.5  | Sub_Sahar | 4           | 8          | 0.9      | NA    | NA      | 435    | 48.20771 | NA         | NA       | NA         |        |           |        |      |      |    |     |
| Seoul          | Korea      | 10.5 | East_Asia | 126.9784    | 37.566     | 98.38892 | 16000 | 24.2    | 38     | 29.74192 | 48         | 47.98453 | 58.28      |        |           |        |      |      |    |     |
| Barcelona      | Spain      | 28.1 | Europe    | 2.15899     | 41.38879   | 16.20809 | 16000 | 24.4    | 12     | 12.53463 | 24.07      | 46.72474 | 39.19      |        |           |        |      |      |    |     |
| Sydney         | Australia  | 25.7 | Oceania   | 151.2068648 | -33.88394  | 48.23991 | NA    | NA      | 19     | 7.591171 | 16.51      | 30.60954 | 14.69      |        |           |        |      |      |    |     |
| Doha           | Qatar      | 19.7 | Middle_Ea | 51.52245    | 25.27932   | 13.51    | 10000 | 37.5    | 10     | 88.76576 | NA         | 40.99329 | NA         |        |           |        |      |      |    |     |
| Ribeirao_Preto | Brasil     | 15.6 | South_Am  | -47.8524681 | -21.169223 | 7.03293  | NA    | NA      | 520    | 12.73691 | NA         | NA       | NA         |        |           |        |      |      |    |     |
| Sendai         | Japan      | 14.3 | East_Asia | 140.8667    | 38.25759   | 10.86012 | 1380  | 22.2    | 1500   | 9.781563 | NA         | 48.2279  | NA         |        |           |        |      |      |    |     |
| Kuala_Lumpur   | Malaysia   | 9.9  | East_Asia | 101.68653   | 3.1412     | 17.9     | 6891  | 29.7    | 66     | 16.34169 | NA         | 28.88487 | NA         |        |           |        |      |      |    |     |
| Santiago       | Chile      | 11.7 | South_Am  | -70.64827   | -33.45694  | 67.1     | 9821  | 8.3     | 570    | 31.51672 | 66.83      | NA       | NA         |        |           |        |      |      |    |     |
| Berlin         | Germany    | 17   | Europe    | 13.41053    | 52.52437   | 33.1193  | 4200  | 19.4    | 34     | 14.28546 | 23.16      | 41.18097 | 30.37      |        |           |        |      |      |    |     |
| Bogota         | Colombia   | 8.8  | South_Am  | -74.08175   | 4.60971    | 80.80734 | 4310  | 16.1    | 2640   | 31.84177 | NA         | NA       | NA         |        |           |        |      |      |    |     |
| Minneapolis    | USA        | 25   | North_Am  | -93.26384   | 44.97997   | 3.82578  | 2959  | 22.2    | 253    | 6.899737 | 18.55      | NA       | 11.6       |        |           |        |      |      |    |     |
| Sacramento     | USA        | 25   | North_Am  | -121.4944   | 38.58157   | 4.66488  | 1952  | 23.6    | 9.1    | 7.282394 | 14.78      | 45.28757 | 9.6        |        |           |        |      |      |    |     |
| Naples         | Italy      | 24.2 | Europe    | 14.24641    | 40.85631   | 9.67068  | 8200  | 30.3    | 0.9144 | 14.47263 | NA         | 47.74057 | NA         |        |           |        |      |      |    |     |
| Vienna         | Austria    | 17   | Europe    | 16.37208    | 48.20849   | 18.99055 | 4326  | 25      | 151    | 12.85594 | NA         | 41.58079 | NA         |        |           |        |      |      |    |     |
| Brisbane       | Australia  | 25.7 | Oceania   | 153.02809   | -27.46794  | 24.08223 | 148   | 15.3    | 28     | 4.317352 | 15.21      | 27.51378 | 7.22       |        |           |        |      |      |    |     |
| Sofia          | Bulgaria   | 22.9 | Europe    | 23.33       | 42.7       | 12.38438 | 2517  | 19      | 500    | 27.21036 | 33.52      | NA       | 22.98      |        |           |        |      |      |    |     |
| Paris          | France     | 29.2 | Europe    | 2.3488      | 48.85341   | 22.06488 | 21000 | 19.7    | 35     | 14.60426 | 28.12      | 41.69506 | 50.87      |        |           |        |      |      |    |     |
| NA             |            | 0    |           |             |            | 0        |       | 3       | 3      | 0        | 0          | 17       | 8          |        |           |        |      |      |    |     |
| NA%            | 0%         |      |           |             |            | 0.00%    |       | 9.38%   | 9.38%  | 0.00%    | 0.00%      | 53.13%   | 25.00%     | 46.88% |           |        |      |      |    |     |

| co       | SPH   | SODC  | SOC     | TC      | TP      | soil m   | soil mo2 | soil tmp | precipitation | standard deviation of monthly precipitati | PCI      | temp diff day | temp diff high |
|----------|-------|-------|---------|---------|---------|----------|----------|----------|---------------|-------------------------------------------|----------|---------------|----------------|
| NA       | 60    | 11    | 117.712 | 161.8   | 543.237 | 32.59021 | 94.67437 | 285.5186 | 569.36944     | 39.05969588                               | 13.51014 | 4.955292505   | 2.952911544    |
| 138.1528 | 64    | 13    | NA      | 175.288 | 613.504 | 25.7408  | 77.66463 | 280.6595 | 524.5652      | 23.74118958                               | 10.58653 | 2.482641071   | -0.394412229   |
| 136.7241 | 61    | 9     | 429.227 | 204.662 | 72.8318 | 29.71639 | 89.92212 | 287.7894 | 1084.0051     | 30.62375502                               | 9.211237 | 4.343503322   | 1.561932733    |
| 117.8192 | 49    | 8     | 669.416 | 187     | 150.29  | 31.81055 | 96.5025  | 301.9597 | 2335.5025     | 75.45220773                               | 9.481423 | 1.91266336    | 1.194156609    |
| 135.4191 | 54    | 12    | 131.163 | 632.319 | 339.807 | 31.64492 | 95.37441 | 288.5561 | 1052.2839     | 33.3788775                                | 9.440136 | 2.857058359   | 0.568732221    |
| 135      | 69    | 9     | 160.502 | 203.813 | 502.403 | 28.01183 | 85.43351 | 295.2982 | 1762.4017     | 117.280908                                | 13.20455 | 0.78257406    | -0.039067864   |
| 136.906  | 76    | 15    | 180.051 | 284.378 | 684.141 | 34.47322 | 103.8248 | 284.5433 | 765.2038      | 43.04587188                               | 11.81341 | 2.640412913   | 1.016043538    |
| 140.3887 | 71    | 2     | NA      | 72.8189 | 126.275 | 36.7523  | 111.7162 | 297.1714 | 2734.0268     | 153.2625004                               | 11.79001 | NA            | NA             |
| NA       | 64    | 8     | 143.88  | 161.539 | 500     | 22.82504 | 79.09687 | 300.9563 | 1153.83484    | 82.60118505                               | 13.97072 | 2.562386936   | 0.702586265    |
| 135.4467 | 63    | 15    | NA      | 385.175 | 319.019 | NA       | NA       | NA       | 438.67805     | 29.78266877                               | 13.40357 | NA            | NA             |
| 140.9604 | 80    | 5     | 132.674 | 146.977 | 430.389 | 35.35589 | 106.7048 | 295.9476 | 3266.951      | 99.8213707                                | 9.360296 | 3.809335509   | 2.303532156    |
| NA       | 67    | 15    | 489.062 | 689.429 | 696.284 | 31.02617 | 93.13898 | 278.1315 | 699.2312      | 24.86431654                               | 9.72426  | 1.538721911   | 0.216821191    |
| 136.9443 | 71    | 11    | 134.961 | 92.6054 | 176.402 | 34.78909 | 104.3882 | 282.4948 | 694.92501     | 27.04355364                               | 9.999216 | NA            | NA             |
| 86.24653 | 55    | 14    | 132.271 | 313     | 153.989 | 34.96167 | 105.3403 | 299.1643 | 1056.3211     | 40.78112336                               | 9.972862 | 4.873962089   | 1.911202506    |
| NA       | 66    | 7     | 129.88  | 114.51  | 233.501 | 25.04217 | 80.1934  | 300.341  | 1333.4723     | 72.6433277                                | 11.59783 | 1.97016406    | 0.65677476     |
| 143.8628 | 59    | 8     | 147     | 252     | 600     | 32.68848 | 98.41455 | 287.4654 | 1279.491      | 101.5475016                               | 15.26211 | 1.985432351   | 1.345566513    |
| 133.546  | 52    | 4     | 144.465 | 267.461 | 558.631 | 30.56758 | 92.10003 | 292.6521 | 610.6091      | 24.11572802                               | 10.04913 | 2.459533251   | 1.139082472    |
| 77.48063 | 72    | 8     | 70.7604 | 63.7583 | 244.45  | 28.63895 | 86.90441 | 293.9237 | 1455.6335     | 119.8641362                               | 15.7921  | 5.084158945   | 0.904470709    |
| 131.1673 | 67    | 9     | 8.14391 | 179     | 20.8638 | NA       | NA       | NA       | 114.956257    | 23.51152794                               | 54.34725 | -0.314165148  | 1.751692585    |
| NA       | 54    | 7     | 126     | 251     | 400     | 36.29412 | 112.8366 | 296.8531 | 1476.2248     | 91.86867806                               | 12.59346 | 2.697417127   | 1.423189147    |
| 140.9051 | 58    | 16    | 224.732 | 257.503 | 279.281 | 35.93136 | 107.6383 | 285.8088 | 1213.2248     | 70.52518639                               | 12.05039 | 2.028352154   | 1.140215975    |
| 122.4258 | 57    | 8     | 187.512 | 250.692 | 591.371 | 32.42783 | 97.94821 | 302.4538 | 2214.6604     | 90.9260148                                | 10.18753 | 2.050254596   | 0.952482346    |
| NA       | 69    | 6     | 92.9552 | 117.713 | 500     | 37.83977 | 113.7202 | 292.3132 | 739.13448     | 95.1482451                                | 26.56168 | 0.964596908   | 1.102700775    |
| 136.5262 | 63    | 5     | 195.008 | 229     | 600     | 30.80621 | 90.60998 | 283.2175 | 639.9496      | 37.76426174                               | 12.17416 | 2.019909992   | 1.347622409    |
| NA       | 53    | 37    | 578.438 | 536.262 | 593.076 | 32.21507 | 97.41745 | 288.4642 | 1154.1129     | 48.55357762                               | 10.28021 | 3.034888663   | -1.94590721    |
| NA       | 73    | 27    | 496.673 | 203.878 | 548.547 | 33.00008 | 95.65216 | 283.1455 | 923.13056     | 47.96821394                               | 11.30345 | 2.032664007   | 1.667722417    |
| NA       | 60    | 15    | 160.363 | 230.976 | 407.68  | 33.67123 | 101.9616 | 291.9884 | 366.721874    | 35.89960513                               | 18.87474 | NA            | NA             |
| 133.6686 | 72    | 3     | 313.662 | 1308.59 | 999.21  | 29.33875 | 88.11168 | 292.9548 | 749.6649      | 36.16843913                               | 10.89379 | NA            | NA             |
| NA       | 65    | 7     | 106.513 | 224.205 | 563.153 | 30.29791 | 89.07242 | 284.367  | 751.81983     | 37.81972517                               | 11.1169  | NA            | NA             |
| 77.44507 | 52    | 2     | 79.3409 | 16.1114 | 273.516 | 31.27084 | 94.41352 | 297.1607 | 1007.6837     | 61.30471499                               | 12.40462 | 2.307865295   | -0.781309271   |
| NA       | 55    | 13    | 339.733 | 229.805 | 505.444 | 31.43277 | 91.76753 | 283.0773 | 751.63741     | 30.63073764                               | 10.16013 | NA            | NA             |
| 135.5395 | 75    | 7     | 217.208 | 300.529 | 500     | 31.51976 | 95.13284 | 285.9434 | 694.1502      | 30.61196903                               | 10.47262 | 2.640332594   | 1.474924365    |
| 11       | 0     | 0     | 3       | 0       | 2       | 2        | 2        | 2        | 0             | 0                                         | 0        | 7             | 7              |
| 34.38%   | 0.00% | 0.00% | 9.38%   | 0.00%   | 6.25%   | 6.25%    | 6.25%    | 0.00%    | 0.00%         | 0.00%                                     | 0.00%    | 21.88%        | 21.88%         |

| greenfractor | DHI   | DNI   | GHI   | UVindex  | wet      | pet      | RH       | vap      | temperature  | fire | carbon | emission | GDP | coastal | city | soil | type | ori | Vegetation |
|--------------|-------|-------|-------|----------|----------|----------|----------|----------|--------------|------|--------|----------|-----|---------|------|------|------|-----|------------|
| 0.897555     | 1.421 | 5.948 | 4.779 | 5.67031  | 7.761667 | 3.55     | NA       | 7.166667 | 10.2249999   | 0    | 58.021 | 0        | 6   | 28      |      |      |      |     |            |
| 0.950509     | 1.328 | 2.96  | 2.713 | 1.953063 | 12.83667 | 1.525    | 76.13411 | 9.116667 | 7.36666667   | 0    | 51.965 | 1        | 10  | 10      |      |      |      |     |            |
| 0.88632      | 1.649 | 4.083 | 4.031 | 4.221608 | 10.4175  | 3.416667 | 63.13997 | 10.61667 | 13.2916666</ |      |        |          |     |         |      |      |      |     |            |

| Vegetation type.1.5 | koppen climate                          | soil_type2  | orVegetation2                                                             | vegetation2 | main clim  |
|---------------------|-----------------------------------------|-------------|---------------------------------------------------------------------------|-------------|------------|
| 2                   | tropical_and_subtropical_steppe_climate | Mollisols   | Meadow ,Short Grassland,No WoodyCover                                     | Grasslands  | arid       |
| 1                   | warm_humid_continental_climate          | Vertisols   | Cold-Deciduous Forest,With Evergreens                                     | Forests     | warm       |
| 1                   | humid_subtropical_climate               | Andisols    | Cold-Deciduous Forest,WithoutEvergreens                                   | Forests     | warm       |
| 1                   | tropical_rainforest_climate             | Ultisols    | Tropical Evergreen Rain forest,Mangrove Forest                            | Forests     | equatorial |
| 1                   | humid_subtropical_climate               | Ultisols    | Cold-Deciduous Forest,WithoutEvergreens                                   | Forests     | warm       |
| 2                   | humid_subtropical_climate               | Ultisols    | Tal/Medium/Short Grass land with 10-40% Woody Tree Cover                  | Grasslands  | warm       |
| 1                   | marine_west_coast_climate               | Inceptisols | Cold-Deciduous Forest,WithoutEvergreens                                   | Forests     | warm       |
| 1                   | humid_subtropical_climate               | Inceptisols | Tropical/Subtropical Evergreen Seasonal Broad leaved Forest               | Forests     | warm       |
| 2                   | tropical_savanna_climate                | Alfisols    | Tall/Medium/Short Grassland with gt 10% Woody TreeCover or Tuft-Plant Cov | Grasslands  | equatorial |
| 1                   | hot-summer_mediterranean_climate        | Inceptisols | Evergreen Broad leaved Sclerophyllous Woodland                            | Forests     | warm       |
| 1                   | humid_subtropical_climate               | Inceptisols | Tropical/Subtropical Evergreen Seasonal Broad leaved Forest               | Forests     | warm       |
| 1                   | warm_humid_continental_climate          | Spodosols   | Cold-Deciduous Forest,With Evergreens                                     | Forests     | snow       |
| 1                   | warm_humid_continental_climate          | Entisols    | Temperate/Subpolar Evergreen Needle leaved Forest                         | Forests     | snow       |
| 1                   | tropical_savanna_climate                | Ultisols    | Tropical/Subtropical Drought-Deciduous Forest                             | Forests     | equatorial |
| 2                   | tropical_savanna_climate                | Alfisols    | Tal/Medium/Short Grass land with 10-40% Woody Tree Cover                  | Grasslands  | equatorial |
| 1                   | hot_humid_continental_climate           | Ultisols    | Cold-Deciduous Forest,With Evergreens                                     | Forests     | snow       |
| 1                   | hot-summer_mediterranean_climate        | Inceptisols | Evergreen Broad leaved Sclerophyllous Woodland                            | Forests     | warm       |
| 1                   | humid_subtropical_climate               | Spodosols   | Evergreen Broad leaved Sclerophyllous Forest, Winter Rain                 | Forests     | warm       |
| 3                   | hot_desert_climate                      | Andisols    | Desert                                                                    | Deserts     | arid       |
| 1                   | tropical_savanna_climate                | Oxisols     | Tropical/Subtropical Drought-Deciduous Forest                             | Forests     | equatorial |
| 1                   | humid_subtropical_climate               | Entisols    | Cold-Deciduous Forest,With Evergreens                                     | Forests     | warm       |
| 1                   | tropical_rainforest_climate             | Ultisols    | Tropical Evergreen Rain forest,Mangrove Forest                            | Forests     | equatorial |
| 1                   | warm-summer_mediterranean_climate       | Entisols    | Xeromorphic Forest/Woodland                                               | Forests     | warm       |
| 1                   | warm_humid_continental_climate          | Inceptisols | Temperate/Subpolar Evergreen Needle leaved Forest                         | Forests     | warm       |
| 1                   | marine_west_coast_climate               | Inceptisols | Tropical Evergreen Rain forest,Mangrove Forest                            | Forests     | warm       |
| 1                   | cold_semi_arid_climates                 | Mollisols   | Cold-Deciduous Forest,WithoutEvergreens                                   | Forests     | snow       |
| 1                   | hot-summer_mediterranean_climate        | Entisols    | Temperate/Subpolar Evergreen Needle leaved Forest                         | Forests     | warm       |
| 1                   | hot-summer_mediterranean_climate        | Andisols    | Cold-Deciduous Forest,With Evergreens                                     | Forests     | warm       |
| 1                   | warm_humid_continental_climate          | Inceptisols | Cold-Deciduous Forest,With Evergreens                                     | Forests     | warm       |
| 1                   | humid_subtropical_climate               | Alfisols    | Tropical Evergreen Rain forest,Mangrove Forest                            | Forests     | warm       |
| 1                   | marine_west_coast_climate               | Alfisols    | Cold-Deciduous Forest,With Evergreens                                     | Forests     | warm       |
| 1                   | marine_west_coast_climate               | Alfisols    | Cold-Deciduous Forest,WithoutEvergreens                                   | Forests     | warm       |
| 0                   |                                         | 0           | 0                                                                         | 0           | 0          |
| 0.00%               |                                         | 0.00%       | 0.00%                                                                     | 0.00%       | 0.00%      |

**Supplementary Table 5.** Results of Two Sample Kolmogorov-Smirnov test between 55 subsamples and all samples

| city           | total size | sample size | p value          |         |              | Kolmogorov-Smirnov Z |         |              |
|----------------|------------|-------------|------------------|---------|--------------|----------------------|---------|--------------|
|                |            |             | observed species | Shannon | Fisher alpha | observed species     | Shannon | Fisher alpha |
| London         | 544        | 55          | 0.937            | 0.789   | 0.828        | 0.535                | 0.652   | 0.626        |
| New_York_City  | 265        | 55          | 0.839            | 0.839   | 0.569        | 0.618                | 0.618   | 0.785        |
| Hong_Kong      | 232        | 55          | 0.891            | 0.84    | 0.309        | 0.579                | 0.618   | 0.965        |
| Ilorin         | 200        | 55          | 0.804            | 0.482   | 0.658        | 0.642                | 0.839   | 0.731        |
| Singapore      | 118        | 55          | 0.998            | 0.998   | 0.784        | 0.389                | 0.389   | 0.655        |
| Marseille      | 110        | 55          | 0.503            | 0.503   | 0.967        | 0.826                | 0.826   | 0.495        |
| Taipei         | 96         | 55          | 0.687            | 0.481   | 0.917        | 0.715                | 0.84    | 0.555        |
| Oslo           | 87         | 55          | 0.89             | 0.859   | 0.978        | 0.58                 | 0.604   | 0.474        |
| Kyiv           | 86         | 55          | 0.902            | 0.829   | 0.959        | 0.569                | 0.626   | 0.507        |
| Rio_De_Janeiro | 85         | 55          | 0.959            | 0.865   | 0.91         | 0.507                | 0.599   | 0.562        |
| Offa           | 82         | 55          | 0.982            | 0.693   | 0.999        | 0.466                | 0.711   | 0.378        |
| Seoul          | 77         | 55          | 0.999            | 0.964   | 0.602        | 0.383                | 0.5     | 0.765        |
| Barcelona      | 75         | 55          | 0.998            | 0.933   | 0.905        | 0.389                | 0.539   | 0.567        |
| Sydney         | 60         | 55          | 0.83             | 0.538   | 0.956        | 0.625                | 0.804   | 0.511        |
| Doha           | 56         | 55          | 0.995            | 0.92    | 0.983        | 0.417                | 0.552   | 0.462        |
| Denver         | 55         | 55          | 1                | 1       | 0.961        | 0                    | 0       | 0.505        |
| Stockholm      | 55         | 55          | 1                | 1       | 0.962        | 0                    | 0       | 0.502        |
| Ribeirao_Preto | 39         | 55          | 1                | 0.982   | 0.999        | 0.305                | 0.465   | 0.374        |
| Sendai         | 29         | 55          | 0.999            | 0.946   | 1            | 0.382                | 0.525   | 0.295        |
| Kuala_Lumpur   | 26         | 55          | 1                | 0.756   | 1            | 0.35                 | 0.673   | 0.347        |
| Santiago       | 25         | 55          | 1                | 0.915   | 1            | 0.226                | 0.558   | 0.347        |
| Berlin         | 21         | 55          | 0.997            | 0.875   | 1            | 0.4                  | 0.592   | 0.122        |
| Baltimore      | 21         | 55          | 1                | 1       | 1            | 0.324                | 0.324   | 0.144        |
| Bogota         | 17         | 55          | 1                | 0.99    | 1            | 0.297                | 0.439   | 0.351        |
| Minneapolis    | 17         | 55          | 0.922            | 0.523   | 1            | 0.551                | 0.813   | 0.22         |
| Sacramento     | 16         | 55          | 0.971            | 0.257   | 1            | 0.488                | 1.012   | 0.06         |
| Hanoi          | 16         | 55          | 0.998            | 0.998   | 1            | 0.395                | 0.395   | 0.146        |
| Naples         | 16         | 55          | 0.997            | 0.982   | 0.999        | 0.405                | 0.466   | 0.362        |
| Vienna         | 16         | 55          | 0.966            | 0.853   | 1            | 0.496                | 0.608   | 0.184        |
| Brisbane       | 15         | 55          | 0.999            | 0.86    | 0.932        | 0.375                | 0.603   | 0.541        |
| Sofia          | 15         | 55          | 1                | 0.95    | 0.964        | 0.166                | 0.52    | 0.499        |
| Paris          | 14         | 55          | 1                | 0.903   | 0.987        | 0.33                 | 0.568   | 0.451        |

**Supplementary Table 6.** Results of the Wilcoxon test on alpha diversity between different continents.(p-value < 0.05 as \* < 0.01 as \*\* < 0.005 as \*\*\* < 0.0001 as \*\*\*\*)

| .y.                | group1             | group2             | p           | p.adj      | p.format        | p.signif        | method   |
|--------------------|--------------------|--------------------|-------------|------------|-----------------|-----------------|----------|
| observed_species   | North_America      | Europe             | 0.00000106  | 0.000018   | 0.000018        | 0.0000011 ****  | Wilcoxon |
|                    | North_America      | East_Asia          | 0.002415673 | 0.027      | 0.027           | 0.00242 **      | Wilcoxon |
|                    | North_America      | Sub_Saharan_Africa | 0.462561905 | 0.93       | 0.93            | 0.46256 ns      | Wilcoxon |
|                    | North_America      | South_America      | 4.65E-11    | 9.8E-10    | 9.8E-10         | 4.7E-11 ****    | Wilcoxon |
|                    | North_America      | Oceania            | 0.198549335 | 0.6        | 0.6             | 0.19855 ns      | Wilcoxon |
|                    | North_America      | Middle_East        | 0.045413818 | 0.27       | 0.27            | 0.04541 *       | Wilcoxon |
|                    | Europe             | East_Asia          | 0.004814283 | 0.043      | 0.043           | 0.00481 **      | Wilcoxon |
|                    | Europe             | Sub_Saharan_Africa | 0.007208353 | 0.058      | 0.058           | 0.00721 **      | Wilcoxon |
|                    | Europe             | South_America      | 0.0000104   | 0.00016    | 0.00016         | 0.00001 ****    | Wilcoxon |
|                    | Europe             | Oceania            | 0.00002     | 0.00028    | 0.00028         | 0.00002 ****    | Wilcoxon |
|                    | Europe             | Middle_East        | 0.0000212   | 0.00028    | 0.00028         | 0.000021 ****   | Wilcoxon |
|                    | East_Asia          | Sub_Saharan_Africa | 0.148353943 | 0.59       | 0.59            | 0.14835 ns      | Wilcoxon |
|                    | East_Asia          | South_America      | 0.000000302 | 0.0000054  | 0.0000054       | 0.0000003 ****  | Wilcoxon |
|                    | East_Asia          | Oceania            | 0.003068985 | 0.031      | 0.031           | 0.00307 **      | Wilcoxon |
|                    | East_Asia          | Middle_East        | 0.000185773 | 0.0022     | 0.0022          | 0.00019 ***     | Wilcoxon |
|                    | Sub_Saharan_Africa | South_America      | 0.00000411  | 0.000066   | 0.000066        | 0.0000041 ****  | Wilcoxon |
|                    | Sub_Saharan_Africa | Oceania            | 0.071355731 | 0.36       | 0.36            | 0.07136 ns      | Wilcoxon |
|                    | Sub_Saharan_Africa | Middle_East        | 0.018793893 | 0.13       | 0.13            | 0.01879 *       | Wilcoxon |
|                    | South_America      | Oceania            | 7.13E-09    | 0.00000014 | 0.00000014      | 7.1E-09 ****    | Wilcoxon |
|                    | South_America      | Middle_East        | 0.000000171 | 0.0000032  | 0.0000032       | 0.00000017 **** | Wilcoxon |
|                    | Oceania            | Middle_East        | 0.48588142  | 0.93       | 0.93            | 0.48588 ns      | Wilcoxon |
|                    | North_America      | Europe             | 1.06437E-06 | 0.000018   | 0.000018        | 0.0000011 ****  | Wilcoxon |
|                    | North_America      | East_Asia          | 0.002415673 | 0.027      | 0.027           | 0.00242 **      | Wilcoxon |
|                    | North_America      | Sub_Saharan_Africa | 0.462561905 | 0.93       | 0.93            | 0.46256 ns      | Wilcoxon |
|                    | North_America      | South_America      | 4.65087E-11 | 9.8E-10    | 9.8E-10         | 4.7E-11 ****    | Wilcoxon |
|                    | North_America      | Oceania            | 0.198549335 | 0.6        | 0.6             | 0.19855 ns      | Wilcoxon |
|                    | North_America      | Middle_East        | 0.045413818 | 0.27       | 0.27            | 0.04541 *       | Wilcoxon |
|                    | Europe             | East_Asia          | 0.004814283 | 0.043      | 0.043           | 0.00481 **      | Wilcoxon |
|                    | Europe             | Sub_Saharan_Africa | 0.007208353 | 0.058      | 0.058           | 0.00721 **      | Wilcoxon |
|                    | Europe             | South_America      | 1.03838E-05 | 0.00016    | 0.00016         | 0.00001 ****    | Wilcoxon |
| Europe             | Oceania            | 2.00134E-05        | 0.00028     | 0.00028    | 0.00002 ****    | Wilcoxon        |          |
| Europe             | Middle_East        | 2.11515E-05        | 0.00028     | 0.00028    | 0.000021 ****   | Wilcoxon        |          |
| East_Asia          | Sub_Saharan_Africa | 0.148353943        | 0.59        | 0.59       | 0.14835 ns      | Wilcoxon        |          |
| East_Asia          | South_America      | 3.01784E-07        | 0.0000054   | 0.0000054  | 0.0000003 ****  | Wilcoxon        |          |
| East_Asia          | Oceania            | 0.003068985        | 0.031       | 0.031      | 0.00307 **      | Wilcoxon        |          |
| East_Asia          | Middle_East        | 0.000185773        | 0.0022      | 0.0022     | 0.00019 ***     | Wilcoxon        |          |
| Sub_Saharan_Africa | South_America      | 4.10837E-06        | 0.000066    | 0.000066   | 0.0000041 ****  | Wilcoxon        |          |
| Sub_Saharan_Africa | Oceania            | 0.071355731        | 0.36        | 0.36       | 0.07136 ns      | Wilcoxon        |          |
| Sub_Saharan_Africa | Middle_East        | 0.018793893        | 0.13        | 0.13       | 0.01879 *       | Wilcoxon        |          |
| South_America      | Oceania            | 7.13193E-09        | 0.00000014  | 0.00000014 | 7.1E-09 ****    | Wilcoxon        |          |
| South_America      | Middle_East        | 1.70542E-07        | 0.0000032   | 0.0000032  | 0.00000017 **** | Wilcoxon        |          |
| Oceania            | Middle_East        | 0.48588142         | 0.93        | 0.93       | 0.48588 ns      | Wilcoxon        |          |
| North_America      | Europe             | 0.519340977        | 1           | 1          | 0.51934 ns      | Wilcoxon        |          |
| North_America      | South_America      | 2.19262E-12        | 4.2E-11     | 4.2E-11    | 2.2E-12 ****    | Wilcoxon        |          |
| North_America      | Oceania            | 0.013738424        | 0.14        | 0.14       | 0.01374 *       | Wilcoxon        |          |
| North_America      | Middle_East        | 0.07887207         | 0.47        | 0.47       | 0.07887 ns      | Wilcoxon        |          |
| North_America      | East_Asia          | 0.066101131        | 0.46        | 0.46       | 0.0661 ns       | Wilcoxon        |          |
| North_America      | Sub_Saharan_Africa | 0.08326623         | 0.47        | 0.47       | 0.08327 ns      | Wilcoxon        |          |
| Europe             | South_America      | 2.13881E-17        | 4.5E-16     | < 2e-16    | ****            | Wilcoxon        |          |
| Europe             | Oceania            | 0.00991718         | 0.11        | 0.11       | 0.00992 **      | Wilcoxon        |          |
| Europe             | Middle_East        | 0.021608194        | 0.19        | 0.19       | 0.02161 *       | Wilcoxon        |          |
| Europe             | East_Asia          | 0.006047397        | 0.073       | 0.073      | 0.00605 **      | Wilcoxon        |          |
| Europe             | Sub_Saharan_Africa | 0.026392692        | 0.21        | 0.21       | 0.02639 *       | Wilcoxon        |          |
| South_America      | Oceania            | 7.18252E-13        | 1.4E-11     | 1.4E-11    | 7.2E-13 ****    | Wilcoxon        |          |
| South_America      | Middle_East        | 0.000834345        | 0.011       | 0.011      | 0.00083 ***     | Wilcoxon        |          |
| South_America      | East_Asia          | 7.23502E-11        | 1.3E-09     | 1.3E-09    | 7.2E-11 ****    | Wilcoxon        |          |
| South_America      | Sub_Saharan_Africa | 7.33465E-05        | 0.0012      | 0.0012     | 0.000073 ****   | Wilcoxon        |          |
| Oceania            | Middle_East        | 8.15075E-05        | 0.0012      | 0.0012     | 0.000082 ****   | Wilcoxon        |          |
| Oceania            | East_Asia          | 1.03754E-05        | 0.00018     | 0.00018    | 0.00001 ****    | Wilcoxon        |          |
| Oceania            | Sub_Saharan_Africa | 0.000330675        | 0.0046      | 0.0046     | 0.00033 ***     | Wilcoxon        |          |
| Middle_East        | East_Asia          | 0.206645058        | 0.83        | 0.83       | 0.20665 ns      | Wilcoxon        |          |
| Middle_East        | Sub_Saharan_Africa | 0.87501889         | 1           | 1          | 0.87502 ns      | Wilcoxon        |          |
| East_Asia          | Sub_Saharan_Africa | 0.3949404          | 1           | 1          | 0.39494 ns      | Wilcoxon        |          |





**Supplementary Table 9.** Results of regression analysis, observed species VS environment and demographic characteristics

Green =  $p \leq 0.05$ , after regression diagnosis

White =  $p > 0.05$

| observed species                        | Coef.      | Std. Err. | t     | P>t    | [95% Conf. Interval] | AdjR-squared    | F       |
|-----------------------------------------|------------|-----------|-------|--------|----------------------|-----------------|---------|
| pm10                                    | 1.664698   | 0.4752099 | 3.5   | 0.0044 | 0.629305 2.700092    | 0.4644 F(1 12)  | = 12.27 |
| soil organic carbon density             | 2.654975   | 0.9829021 | 2.7   | 0.0118 | 0.6382262 4.671723   | 0.1836 F(1 27)  | = 7.30  |
| urban-rural temperature difference nigh | -21.3304   | 8.587104  | -2.48 | 0.0207 | -39.09418 -3.566619  | 0.1772 F(1 23)  | = 6.17  |
| UVindex                                 | 5.944834   | 2.434957  | 2.44  | 0.0207 | 0.9719886 10.91768   | 0.1379 F(1 30)  | = 5.96  |
| GDP                                     | -0.7020717 | 0.3364952 | -2.09 | 0.0458 | -1.390282 -0.0138618 | 0.1005 F(1 29)  | = 4.35  |
| soil organic carbon                     | 0.0914587  | 0.0482603 | 1.9   | 0.0688 | -0.0075633 0.1904806 | 0.0847 F(1 27)  | = 3.59  |
| city total population                   | 0.4424189  | 0.2377119 | 1.86  | 0.0733 | -0.0445119 0.9293497 | 0.0783 F(1 28)  | = 3.46  |
| city latitude                           | -0.419284  | 0.2623106 | -1.6  | 0.1204 | -0.9549938 0.1164258 | 0.0478 F(1 30)  | = 2.55  |
| city longitude                          | -0.1447426 | 0.0927649 | -1.56 | 0.1292 | -0.3341938 0.0447085 | 0.0442 F(1 30)  | = 2.43  |
| city ave june temp                      | -1.640685  | 1.226618  | -1.34 | 0.1922 | -4.157497 0.876127   | 0.0274 F(1 27)  | = 1.79  |
| GHI                                     | 10.52793   | 8.857782  | 1.19  | 0.2439 | -7.562078 28.61793   | 0.0131 F(1 30)  | = 1.41  |
| soil ph                                 | -1.066757  | 0.9273348 | -1.15 | 0.2591 | -2.960627 0.8271134  | 0.0103 F(1 30)  | = 1.32  |
| greenfraction                           | 42.00448   | 39.32722  | 1.07  | 0.294  | -38.31242 122.3214   | 0.0045 F(1 30)  | = 1.14  |
| no2                                     | 0.346106   | 0.3309954 | 1.05  | 0.3123 | -0.3593939 1.051606  | 0.0058 F(1 15)  | = 1.09  |
| soil total carbon                       | 0.0317239  | 0.0328186 | 0.97  | 0.3423 | -0.0356143 0.0990622 | -0.0023 F(1 27) | = 0.93  |
| soil total phosphorus                   | -0.0284217 | 0.0295571 | -0.96 | 0.3439 | -0.0887854 0.0319421 | -0.0024 F(1 30) | = 0.92  |
| RH                                      | 0.4480738  | 0.4834193 | 0.93  | 0.364  | -0.5544765 1.450624  | -0.0062 F(1 22) | = 0.86  |
| DHI                                     | 14.55513   | 16.50379  | 0.88  | 0.3848 | -19.1501 48.26035    | -0.0072 F(1 30) | = 0.78  |
| soil moisture(10-40cm)                  | 0.7418483  | 0.8433093 | 0.88  | 0.3865 | -0.9855926 2.469289  | -0.0079 F(1 28) | = 0.77  |
| soil moisture(0-10cm)                   | 1.958984   | 2.331778  | 0.84  | 0.408  | -2.817446 6.735414   | -0.0102 F(1 28) | = 0.71  |
| pm25                                    | 0.3535172  | 0.4411036 | 0.8   | 0.4292 | -0.5473365 1.254371  | -0.0117 F(1 30) | = 0.64  |
| fire carbon emissions                   | -0.1096553 | 0.1785517 | -0.61 | 0.5438 | -0.4743066 0.2549959 | -0.0205 F(1 30) | = 0.38  |
| pet                                     | -4.568013  | 7.636297  | -0.6  | 0.5542 | -20.16341 11.02739   | -0.0212 F(1 30) | = 0.36  |
| co                                      | -0.1026858 | 0.2127566 | -0.48 | 0.6352 | -0.5496709 0.3442993 | -0.0421 F(1 18) | = 0.23  |
| o3                                      | -0.2254151 | 0.545244  | -0.41 | 0.6833 | -1.356182 0.9053518  | -0.0374 F(1 22) | = 0.17  |
| DNI                                     | 2.325526   | 5.991793  | 0.39  | 0.7007 | -9.911348 14.5624    | -0.0282 F(1 30) | = 0.15  |
| urban-rural temperature difference day  | 2.48147    | 7.529429  | 0.33  | 0.7447 | -13.09434 18.05728   | -0.0386 F(1 23) | = 0.11  |
| city population density                 | 0.0004301  | 0.0016834 | 0.26  | 0.8003 | -0.0030239 0.003984  | -0.0345 F(1 27) | = 0.07  |
| PCI                                     | -0.179344  | 0.9370173 | -0.19 | 0.849  | -2.093579 1.73371    | -0.0321 F(1 30) | = 0.04  |
| SDP                                     | 0.0318145  | 0.2220828 | 0.14  | 0.887  | -0.421739 0.4853681  | -0.0326 F(1 30) | = 0.02  |
| temperature                             | -0.1420908 | 1.134131  | -0.13 | 0.9011 | -2.458286 2.174124   | -0.0328 F(1 30) | = 0.02  |
| vap                                     | -0.0783774 | 1.150098  | -0.07 | 0.9461 | -2.427191 2.270436   | -0.0332 F(1 30) | = 0.00  |
| soil tmp                                | 0.05259    | 1.173718  | 0.04  | 0.9646 | -2.351662 2.456842   | -0.0356 F(1 28) | = 0.00  |
| wet                                     | 0.0370623  | 1.657394  | 0.02  | 0.9823 | -3.347788 3.421912   | -0.0333 F(1 30) | = 0.00  |
| precipitation                           | -0.0002419 | 0.0110025 | -0.02 | 0.9826 | -0.022712 0.0222281  | -0.0333 F(1 30) | = 0.00  |

|                             | Estimate     | Std. Error  | t value      | Pr(>t)       | AdjR-squared |
|-----------------------------|--------------|-------------|--------------|--------------|--------------|
| (Intercept)                 | 36.31        | 29.93       | 1.213        | 0.235        | -0.01294     |
| main climateequatorial      | 21.57        | 34.55       | 0.624        | 0.538        |              |
| main climatesnow            | 9            | 36.65       | 0.246        | 0.808        |              |
| main climatewarm            | 36.38        | 31.39       | 1.159        | 0.256        |              |
| (Intercept)                 | 40.818       | 42.745      | 0.955        | 0.348        | -0.03337     |
| dat2\$vegetation2Forests    | 26.606       | 43.529      | 0.611        | 0.546        |              |
| dat2\$vegetation2Grasslands | 7.586        | 47.79       | 0.159        | 0.875        |              |
| (Intercept)                 | 68.443       | 10.306      | 6.641        | 2.36e-07 *** | -0.02111     |
| dat2\$coastal city          | -9.019       | 15.052      | -0.599       | 0.554        |              |
| (Intercept)                 | 55.53090909  | 20.24421315 | 2.743050998  | 0.011586487  | -0.158924553 |
| soil type2Andisols          | 6.08727273   | 33.05866164 | 0.184135486  | 0.855521006  |              |
| soil type2Entisols          | 15.98727274  | 30.36631973 | 0.526480419  | 0.603595183  |              |
| soil type2Inceptisols       | 29.59636364  | 25.80640948 | 1.146860963  | 0.263230251  |              |
| soil type2Mollisols         | -21.78545455 | 37.87345484 | -0.575216986 | 0.570729588  |              |
| soil type2Oxisols           | -9.87636364  | 49.58799247 | -0.199168451 | 0.843881207  |              |
| soil type2Spodosols         | 5.46909091   | 37.87345484 | 0.144404331  | 0.886439082  |              |
| soil type2Ultisols          | 4.696363637  | 27.41079419 | 0.171332637  | 0.86546067   |              |
| soil type2Vertisols         | -26.74909091 | 49.58799247 | -0.539426776 | 0.594776566  |              |



**Supplementary Table 10.** Results of regression analysis, Shannon VS environment and demographic characteristics

Green = p<=0.05, after regression diagnosis  
White = p>0.05

|                                        | Coef.      | Std. Err. | t     | P>t    | [95% Conf. Interval] | AdjR-squared | F                      |
|----------------------------------------|------------|-----------|-------|--------|----------------------|--------------|------------------------|
| Shannon                                |            |           |       |        |                      |              |                        |
| GDP                                    | -0.0104301 | 0.0054012 | -1.93 | 0.0633 | -0.0214769           | 0.0006166    | 0.0834 F(1 29) = 3.73  |
| soil organic carbon                    | 0.0012972  | 0.0007312 | 1.77  | 0.0873 | -0.0002032           | 0.0027975    | 0.0712 F(1 27) = 3.15  |
| pm10                                   | 0.0221417  | 0.0121411 | 1.82  | 0.0932 | -0.0043115           | 0.0485949    | 0.1518 F(1 12) = 3.33  |
| urban-rural temperature difference nig | -0.2283643 | 0.1324367 | -1.72 | 0.0981 | -0.5023305           | 0.0456018    | 0.076 F(1 23) = 2.97   |
| UVindex                                | 0.0591165  | 0.0411825 | 1.44  | 0.1615 | -0.0249894           | 0.1432225    | 0.0331 F(1 30) = 2.06  |
| soil total carbon                      | 0.0007329  | 0.0005102 | 1.44  | 0.1623 | -0.0003138           | 0.0017797    | 0.0366 F(1 27) = 2.06  |
| soil organic carbon density            | 0.0233231  | 0.017066  | 1.37  | 0.183  | -0.0116935           | 0.0583397    | 0.0301 F(1 27) = 1.87  |
| greenfraction                          | 0.828546   | 0.6217308 | 1.33  | 0.1927 | -0.4411976           | 2.09829      | 0.0244 F(1 30) = 1.78  |
| no2                                    | 0.0129563  | 0.0101121 | 1.28  | 0.2196 | -0.0085973           | 0.0345098    | 0.0386 F(1 15) = 1.64  |
| city total population                  | 0.0045072  | 0.0039345 | 1.15  | 0.2617 | -0.0035522           | 0.0125665    | 0.0107 F(1 28) = 1.31  |
| city latitude                          | -0.0038192 | 0.0043077 | -0.89 | 0.3823 | -0.0126166           | 0.0049762    | -0.0069 F(1 30) = 0.79 |
| DHI                                    | 0.2323564  | 0.2635609 | 0.88  | 0.385  | -0.3059069           | 0.7706197    | -0.0072 F(1 30) = 0.78 |
| soil ph                                | -0.0130795 | 0.0149426 | -0.88 | 0.3884 | -0.0435965           | 0.0174374    | -0.0076 F(1 30) = 0.77 |
| city longitude                         | -0.0012966 | 0.0015221 | -0.85 | 0.401  | -0.0044051           | 0.0018118    | -0.0089 F(1 30) = 0.73 |
| RH                                     | 0.011257   | 0.0140724 | 0.8   | 0.4323 | -0.0179274           | 0.0404413    | -0.0159 F(1 22) = 0.64 |
| PCI                                    | -0.0104073 | 0.0148519 | -0.7  | 0.4889 | -0.040739            | 0.0199243    | -0.0167 F(1 30) = 0.49 |
| soil total phosphorus                  | -0.0003179 | 0.0004757 | -0.67 | 0.509  | -0.0012895           | 0.0006536    | -0.0182 F(1 30) = 0.45 |
| pet                                    | -0.078061  | 0.1218429 | -0.64 | 0.5266 | -0.3268975           | 0.1707754    | -0.0194 F(1 30) = 0.41 |
| GHI                                    | 0.0903615  | 0.143804  | 0.63  | 0.5345 | -0.2033254           | 0.3840483    | -0.0199 F(1 30) = 0.39 |
| pm25                                   | 0.0040762  | 0.0070802 | 0.58  | 0.5691 | -0.0103836           | 0.018536     | -0.022 F(1 30) = 0.33  |
| soil moisture(10-40cm)                 | 0.0069314  | 0.0133906 | 0.52  | 0.6088 | -0.0204981           | 0.0343608    | -0.0259 F(1 28) = 0.27 |
| wet                                    | 0.0135601  | 0.0263521 | 0.51  | 0.6106 | -0.040258            | 0.0673782    | -0.0243 F(1 30) = 0.26 |
| city population density                | 0.0000135  | 0.0000268 | 0.5   | 0.6185 | -0.0000414           | 0.0000664    | -0.0274 F(1 27) = 0.25 |
| precipitation                          | 0.0000854  | 0.000175  | 0.49  | 0.6291 | -0.000272            | 0.0004428    | -0.0252 F(1 30) = 0.24 |
| soil moisture(0-10cm)                  | 0.0175466  | 0.03701   | 0.47  | 0.6391 | -0.058265            | 0.0933581    | -0.0275 F(1 28) = 0.22 |
| SDP                                    | 0.0016682  | 0.0035347 | 0.47  | 0.6404 | -0.0055506           | 0.0088869    | -0.0257 F(1 30) = 0.22 |
| fire carbon emissions                  | -0.000894  | 0.0028646 | -0.31 | 0.7571 | -0.0067443           | 0.0049564    | -0.03 F(1 30) = 0.10   |
| urban-rural temperature difference da  | 0.0337549  | 0.1096091 | 0.31  | 0.7609 | -0.1929888           | 0.2604985    | -0.0392 F(1 23) = 0.09 |
| o3                                     | 0.0046663  | 0.0158258 | 0.29  | 0.7709 | -0.0281544           | 0.0374871    | -0.0413 F(1 22) = 0.09 |
| soil tmp                               | 0.0051614  | 0.0184474 | 0.28  | 0.7817 | -0.0326264           | 0.0429492    | -0.0328 F(1 28) = 0.08 |
| co                                     | 0.0016359  | 0.0061811 | 0.26  | 0.7943 | -0.01135             | 0.0146218    | -0.0515 F(1 18) = 0.07 |
| DNI                                    | -0.0199175 | 0.0958574 | -0.21 | 0.8368 | -0.2156844           | 0.1758494    | -0.0318 F(1 30) = 0.04 |
| vap                                    | 0.0023182  | 0.0183631 | 0.13  | 0.9004 | -0.0351843           | 0.0398207    | -0.0328 F(1 30) = 0.02 |
| city ave june temp                     | -0.0016525 | 0.0202065 | -0.08 | 0.9354 | -0.0431127           | 0.0398078    | -0.0368 F(1 27) = 0.01 |
| temperature                            | 0.0014288  | 0.0181145 | 0.08  | 0.9377 | -0.0355659           | 0.0384234    | -0.0331 F(1 30) = 0.01 |

  

|                              | Estimate     | Std. Error  | t value      | Pr(>t)      | AdjR-squared |
|------------------------------|--------------|-------------|--------------|-------------|--------------|
| (Intercept)                  | 4.7845       | 0.4565      | 10.48        | 3.39E-11    | 0.07553      |
| dat2\$main climateequatorial | 0.6907       | 0.5272      | 1.31         | 0.2008      |              |
| dat2\$main climatewarm       | 0.9468       | 0.4788      | 1.977        | 0.0579      |              |
| dat2\$main climatesnow       | 0.4315       | 0.5592      | 0.772        | 0.4467      |              |
| (Intercept)                  | 5.0081       | 0.6753      | 7.417        | 3.58E-08    | -0.0112      |
| dat2\$vegetation2Forests     | 0.6153       | 0.6876      | 0.895        | 0.378       |              |
| dat2\$vegetation2Grasslands  | 0.2594       | 0.755       | 0.344        | 0.734       |              |
| (Intercept)                  | 5.5599363    | 0.165557    | 33.583       | <2e-16      | -0.03333     |
| dat2\$coastal city           | -0.0004461   | 0.2418115   | -0.002       | 0.999       |              |
| (Intercept)                  | 5.493058909  | 0.301874754 | 18.19648327  | 3.75399E-15 | -0.010461955 |
| soil type2Andisols           | 0.173911394  | 0.492959409 | 0.352790495  | 0.72745812  |              |
| soil type2Entisols           | 0.023654727  | 0.452812131 | 0.052239606  | 0.958788846 |              |
| soil type2Inceptisols        | 0.417070637  | 0.384816315 | 1.083817448  | 0.289676972 |              |
| soil type2Mollisols          | -0.701550727 | 0.564755951 | -1.242219272 | 0.226673171 |              |
| soil type2Oxisols            | -0.191417091 | 0.739439113 | -0.258867955 | 0.798039834 |              |
| soil type2Spodosols          | 0.205702     | 0.564755951 | 0.364231665  | 0.719012202 |              |
| soil type2Ultisols           | 0.062852     | 0.408740349 | 0.153769992  | 0.879132339 |              |
| soil type2Vertisols          | -1.013531636 | 0.739439113 | -1.370676257 | 0.183705277 |              |

**Supplementary Table 11.** Results of regression analysis, Fisher alpha VS environment and demographic characteristics

Green = p<=0.05, after regression diagnosis  
 White = p>0.05

| fisher alpha                                | Coef.      | Std. Err. | t      | P> t   | [95% Conf. Interval] | F          | Adj R-squared |
|---------------------------------------------|------------|-----------|--------|--------|----------------------|------------|---------------|
| UVindex                                     | 2.571007   | 0.8093049 | 3.18   | 0.0034 | 0.9181855            | 4.223828   | F(1 30)=10.09 |
| GDP                                         | -0.338     | 0.108     | -3.130 | 0.004  | -0.559               | -0.117     | F(1 30)=9.77  |
| pm10                                        | 0.683      | 0.201     | 3.400  | 0.005  | 0.249                | 1.118      | F(1 13)=11.55 |
| soil organic carbon density                 | 0.9694457  | 0.3410664 | 2.84   | 0.008  | 0.2728951            | 1.665996   | F(1 30)=8.08  |
| elevation                                   | 0.0112626  | 0.0040565 | 2.78   | 0.0095 | 0.0029661            | 0.019559   | F(1 29)=7.71  |
| urban-rural temperature difference night    | -7.074324  | 3.005855  | -2.35  | 0.0275 | -13.29241            | -0.856238  | F(1 23)=5.54  |
| city latitude                               | -0.1879009 | 0.0895496 | -2.1   | 0.0444 | -0.3707856           | -0.0050161 | F(1 30)=4.40  |
| GHI                                         | 6.193248   | 2.973166  | 2.08   | 0.0459 | 0.1212321            | 12.26526   | F(1 30)=4.34  |
| city longitude                              | -0.0578915 | 0.0321579 | -1.8   | 0.0819 | -0.1235668           | 0.0077838  | F(1 30)=3.24  |
| city total population                       | 0.1513654  | 0.083926  | 1.8    | 0.0821 | -0.0205492           | 0.32328    | F(1 28)=3.25  |
| pm25                                        | 0.2541577  | 0.1494107 | 1.7    | 0.0993 | -0.0509796           | 0.5592951  | F(1 30)=2.89  |
| soil organic carbon                         | 0.024467   | 0.0174365 | 1.4    | 0.172  | -0.0113098           | 0.0602438  | F(1 27)=1.97  |
| DHI                                         | 7.567247   | 5.70148   | 1.33   | 0.1944 | -4.076729            | 19.21122   | F(1 30)=1.76  |
| greenness fraction                          | 17.89613   | 13.67669  | 1.31   | 0.2006 | -10.03541            | 45.82767   | F(1 30)=1.71  |
| city ave june temp                          | -0.5613447 | 0.4340307 | -1.29  | 0.2069 | -1.451902            | 0.3292127  | F(1 27)=1.67  |
| soil moisture(10-40cm)                      | 0.263664   | 0.2970147 | 0.89   | 0.3823 | -0.344743            | 0.872071   | F(1 28)=0.79  |
| standard deviation of monthly precipitation | 0.062262   | 0.0771319 | 0.81   | 0.4259 | -0.0952623           | 0.2197862  | F(1 30)=0.65  |
| DNI                                         | 1.615908   | 2.087303  | 0.77   | 0.4449 | -2.646933            | 5.878748   | F(1 30)=0.60  |
| wet                                         | -0.4403115 | 0.5760732 | -0.76  | 0.4506 | -1.61681             | 0.7361869  | F(1 30)=0.58  |
| RH                                          | -0.1323453 | 0.1817136 | -0.73  | 0.4741 | -0.5091963           | 0.2445057  | F(1 22)=0.53  |
| soil total carbon                           | 0.0077352  | 0.0111504 | 0.69   | 0.4932 | -0.015037            | 0.0305074  | F(1 30)=0.48  |
| PCI                                         | 0.2153991  | 0.3266829 | 0.66   | 0.5147 | -0.4517764           | 0.8825747  | F(1 30)=0.43  |
| soil moisture(0-10cm)                       | 0.5438425  | 0.8253723 | 0.66   | 0.5153 | -1.146856            | 2.234541   | F(1 28)=0.43  |
| Soil PH                                     | -0.2148762 | 0.3302194 | -0.65  | 0.5202 | -0.8892742           | 0.4595218  | F(1 30)=0.42  |
| soil total phosphorus                       | 0.0078613  | 0.012425  | 0.63   | 0.5317 | -0.0175141           | 0.0332366  | F(1 30)=0.40  |
| soil tmp                                    | 0.2491625  | 0.410812  | 0.61   | 0.5491 | -0.5923477           | 1.090673   | F(1 28)=0.37  |
| urban-rural temperature difference day      | -1.477212  | 2.594881  | -0.57  | 0.5747 | -6.845132            | 3.890708   | F(1 23)=0.32  |
| temperature                                 | 0.2162926  | 0.3961559 | 0.55   | 0.5891 | -0.5927657           | 1.025351   | F(1 30)=0.30  |
| fire carbon emissions                       | -0.0274917 | 0.062854  | -0.44  | 0.665  | -0.1558567           | 0.1008733  | F(1 30)=0.19  |
| o3                                          | -0.0851279 | 0.2034553 | -0.42  | 0.6797 | -0.5070683           | 0.3368125  | F(1 22)=0.18  |
| vapour                                      | 0.1627108  | 0.4025552 | 0.4    | 0.6889 | -0.6594166           | 0.9848383  | F(1 30)=0.16  |
| co                                          | -0.0102142 | 0.0635099 | -0.16  | 0.874  | -0.1436436           | 0.1232151  | F(1 18)=0.03  |
| no2                                         | -0.0201717 | 0.1342387 | -0.15  | 0.8826 | -0.3062948           | 0.2659513  | F(1 15)=0.02  |
| city population density                     | 0.000057   | 0.0005951 | 0.1    | 0.9244 | -0.0011639           | 0.001278   | F(1 27)=0.01  |
| precipitation                               | -0.0003078 | 0.0038609 | -0.08  | 0.937  | -0.0081927           | 0.0075771  | F(1 30)=0.01  |
| pet                                         | 0.1285362  | 2.695737  | 0.05   | 0.9623 | -5.376892            | 5.633965   | F(1 30)=0.00  |

**Supplementary Table 12. Results of regression analysis, AMR VS environment and demographic characteristics**

Green =  $p < 0.05$ , after regression diagnosis  
 White =  $p > 0.05$

| Aminoglycosides prevalence               | Coef.      | Std. Err.  | t     | P>t    | [95% Conf.         | Interval]          | F       | AdjR-squared |
|------------------------------------------|------------|------------|-------|--------|--------------------|--------------------|---------|--------------|
| city longitude                           | -0.0004237 | 0.0005404  | -0.78 | 0.4391 | -0.0015274         | 0.0006799 F(1 30)  | = 0.61  | -0.0126      |
| city latitude                            | -0.002721  | 0.0014646  | -1.86 | 0.073  | -0.005712          | 0.0002701 F(1 30)  | = 3.45  | 0.0733       |
| city total population                    | 0.0025404  | 0.0013284  | 1.91  | 0.0661 | -0.0001808         | 0.0052615 F(1 28)  | = 3.66  | 0.0839       |
| city population density                  | -9.47E-06  | 9.12E-06   | -1.04 | 0.3084 | -0.0000282         | 0.00000925 F(1 27) | = 1.08  | 0.0028       |
| city ave june temp                       | -0.0002252 | 0.00069894 | -0.03 | 0.9745 | -0.0145662         | 0.0141159 F(1 27)  | = 0.00  | -0.037       |
| pm25                                     | 0.0047813  | 0.0023666  | 2.03  | 0.049  | -0.0004919         | 0.006246 F(1 30)   | = 4.10  | 0.0909       |
| pm10                                     | 0.0031543  | 0.0017072  | 1.85  | 0.0894 | -0.0005653         | 0.006874 F(1 12)   | = 3.41  | 0.1566       |
| o3                                       | -0.0105584 | 0.0046607  | -2.27 | 0.0337 | -0.0202241         | -0.0008927 F(1 22) | = 5.13  | 0.1523       |
| no2                                      | -0.0005781 | 0.0012968  | -0.45 | 0.6621 | -0.003421          | 0.0021859 F(1 15)  | = 0.20  | -0.0527      |
| co                                       | -0.0012917 | 0.0016155  | -0.8  | 0.4344 | -0.0046856         | 0.0021023 F(1 18)  | = 0.64  | -0.0194      |
| soil ph                                  | -0.0023369 | 0.0053459  | -0.44 | 0.6651 | -0.0132548         | 0.008581 F(1 30)   | = 0.19  | -0.0268      |
| soil organic carbon density              | 0.0123823  | 0.0057699  | 2.15  | 0.0401 | 0.0005986          | 0.0241661 F(1 30)  | = 4.61  | 0.1042       |
| soil organic carbon                      | 0.000281   | 0.000281   | 1     | 0.3279 | -0.0002966         | 0.0008566 F(1 27)  | = 0.99  | -0.0003      |
| soil total carbon                        | -0.000627  | 0.0001811  | -0.35 | 0.7318 | -0.0004343         | 0.0003099 F(1 27)  | = 0.12  | -0.0325      |
| soil total phosphorus                    | -0.000243  | 0.0001698  | -0.14 | 0.8869 | -0.0003711         | 0.0003224 F(1 30)  | = 0.02  | -0.0326      |
| soil moisture(0-10cm)                    | -0.0117639 | 0.0129951  | -0.91 | 0.3731 | -0.0383832         | 0.0148554 F(1 28)  | = 0.82  | -0.0063      |
| soil moisture(10-40cm)                   | -0.0018438 | 0.004761   | -0.39 | 0.7015 | -0.0115962         | 0.0079087 F(1 28)  | = 0.15  | -0.0302      |
| soil tmp                                 | 0.002176   | 0.0061372  | 1.98  | 0.0571 | -0.0003954         | 0.0247474 F(1 28)  | = 3.94  | 0.0919       |
| precipitation                            | 0.0000924  | 0.0000599  | 1.54  | 0.1336 | -0.00003           | 0.0002148 F(1 30)  | = 2.38  | 0.0425       |
| SDP                                      | 0.001916   | 0.0012077  | 1.59  | 0.1231 | -0.0005505         | 0.0043825 F(1 30)  | = 2.52  | 0.0466       |
| PCI                                      | -0.0041396 | 0.0052524  | -0.79 | 0.4368 | -0.0148664         | 0.0065873 F(1 30)  | = 0.62  | -0.0124      |
| urban-rural temperature difference day   | 0.00832    | 0.0421522  | 0.2   | 0.8453 | -0.0788785         | 0.0955186 F(1 23)  | = 0.04  | -0.0417      |
| urban-rural temperature difference night | -0.000243  | 0.0042639  | -2.63 | 0.0149 | -0.011333          | -0.003527 F(1 28)  | = 6.84  | 0.1888       |
| greenness fraction                       | 0.2138523  | 0.2233866  | 0.96  | 0.3461 | -0.242364          | 0.6700686 F(1 30)  | = 0.92  | -0.0027      |
| DHI                                      | 0.2986105  | 0.0773222  | 3.86  | 0.0006 | 0.1406975          | 0.4565234 F(1 30)  | = 14.91 | 0.3038       |
| DNI                                      | -0.0521908 | 0.0326342  | -1.6  | 0.1202 | -0.1188386         | 0.014457 F(1 30)   | = 2.56  | 0.0478       |
| GHI                                      | 0.0598181  | 0.0501232  | 1.19  | 0.2421 | -0.0425471         | 0.1621833 F(1 30)  | = 1.42  | 0.0135       |
| UVindex                                  | 0.047198   | 0.0123855  | 3.81  | 0.0006 | 0.0219035          | 0.0724925 F(1 30)  | = 14.52 | 0.3037       |
| wet                                      | 0.0060254  | 0.0093157  | 0.65  | 0.5227 | -0.0129999         | 0.0250506 F(1 30)  | = 0.42  | -0.0191      |
| pet                                      | -0.0044423 | 0.0434686  | -0.1  | 0.9193 | -0.032171          | 0.0843325 F(1 30)  | = 0.01  | -0.0333      |
| RH                                       | 0.0066434  | 0.0044392  | 1.5   | 0.1487 | -0.0158496 F(1 22) | = 2.24             | 0.0511  |              |
| vap                                      | 0.0153306  | 0.0058773  | 2.61  | 0.0117 | 0.0033276          | 0.0273335 F(1 30)  | = 6.80  | 0.1577       |
| temperature                              | 0.0128475  | 0.0059767  | 2.15  | 0.0398 | 0.0006413          | 0.0250536 F(1 30)  | = 4.62  | 0.1046       |
| fire carbon emissions                    | -0.0001795 | 0.0010164  | -0.18 | 0.861  | -0.0022552         | 0.0018962 F(1 30)  | = 0.03  | -0.0323      |
| GDP                                      | -0.0060977 | 0.0015933  | -4.34 | 0.0002 | -0.0101665         | -0.003649 F(1 29)  | = 18.80 | 0.3723       |
| anti consum                              | -0.0119268 | 0.0057291  | -2.08 | 0.046  | -0.0236271         | -0.0002265 F(1 30) | = 4.33  | 0.0971       |
| coastal city                             | -0.1301175 | 0.0823409  | -1.58 | 0.1245 | -0.29828           | 0.038045 F(1 30)   | = 2.50  | 0.0461       |
| main clima-l                             | 0.3042602  | 0.1913588  | 1.59  | 0.1231 | -0.0877206         | 0.6962409 F(1 28)  | = 1.32  | 0.0302       |
| main climate snow                        | 0.0629287  | 0.2029667  | 0.31  | 0.7589 | -0.352937          | 0.4786871          |         |              |
| main climate warm                        | 0.144579   | 0.1738103  | 0.83  | 0.4125 | -0.2114552         | 0.5006132          |         |              |
| soil type Andisols                       | -0.2370938 | 0.1828099  | -1.3  | 0.2075 | -0.615265          | 0.1410774 F(8 23)  | = 0.63  | -0.1064      |
| soil type Entisols                       | -0.1900452 | 0.1679217  | -1.13 | 0.2694 | -0.5374176         | 0.1573273          |         |              |
| soil type Inceptisols                    | -0.0195232 | 0.142706   | -0.14 | 0.8924 | -0.314733          | 0.2756866          |         |              |
| soil type Gelisols                       | -0.155131  | 0.2094351  | -0.74 | 0.4664 | -0.5883805         | 0.2781185          |         |              |
| soil type Oxisols                        | -0.1395872 | 0.2742149  | -0.51 | 0.6156 | -0.7068439         | 0.4276696          |         |              |
| soil type Spodosols                      | -0.2590169 | 0.2094351  | -1.24 | 0.2287 | -0.6922664         | 0.1742327          |         |              |
| soil type Ultisols                       | -0.0456579 | 0.151578   | -0.3  | 0.7659 | -0.3592309         | 0.2678951          |         |              |
| soil type Vertisols                      | -0.3190743 | 0.2742149  | -1.16 | 0.2565 | -0.8863311         | 0.2481824          |         |              |
| vegetation Forests                       | 0.1500394  | 0.2231686  | 0.67  | 0.5067 | -0.3063916         | 0.6064704 F(8 29)  | = 3.78  | 0.1521       |
| vegetation Grasslands                    | 0.4569613  | 0.245014   | 1.87  | 0.0723 | -0.0441486         | 0.9580712          |         |              |
| Europe                                   | -0.1304392 | 0.0896705  | -1.46 | 0.1579 | -0.3149893         | 0.0541109 F(6 25)  | = 4.35  | 0.3935       |
| the Middle East                          | -0.2143813 | 0.1981296  | -1.08 | 0.2896 | -0.6224369         | 0.1936743          |         |              |
| North America                            | -0.132949  | 0.1085201  | -1.23 | 0.232  | -0.3564502         | 0.0905523          |         |              |
| Oceania                                  | -0.2084289 | 0.1485972  | -1.4  | 0.173  | -0.5144706         | 0.0976128          |         |              |
| South America                            | 0.2847762  | 0.1161638  | 2.28  | 0.0314 | 0.0251824          | 0.504002           |         |              |
| Sub Saharan Africa                       | 0.3454093  | 0.1485972  | 2.32  | 0.0286 | 0.0301676          | 0.651251           |         |              |
| Elfamycins prevalence                    | Coef.      | Std. Err.  | t     | P>t    | [95% Conf.         | Interval]          | F       | AdjR-squared |
| city longitude                           | -0.0007642 | 0.0005393  | -1.42 | 0.1668 | -0.0018656         | 0.0003371 F(1 30)  | = 2.01  | 0.0315       |
| city latitude                            | -0.0024934 | 0.0015111  | -1.65 | 0.1093 | -0.0055792         | 0.0005925 F(1 30)  | = 2.72  | 0.0527       |
| city total population                    | 0.0015774  | 0.001397   | 1.13  | 0.2684 | -0.0012842         | 0.004439 F(1 28)   | = 1.27  | 0.0094       |
| city population density                  | 6.13E-07   | 9.47E-06   | 0.06  | 0.9489 | -0.0000188         | 0.00002 F(1 27)    | = 0.00  | -0.0369      |
| city ave june temp                       | -0.0037956 | 0.0070757  | -0.54 | 0.5961 | -0.0183137         | 0.0107224 F(1 27)  | = 0.29  | -0.0261      |
| pm25                                     | 0.0038561  | 0.0024764  | 1.56  | 0.1299 | -0.0012015         | 0.0089137 F(1 30)  | = 2.42  | 0.0439       |
| pm10                                     | 0.0030875  | 0.0039118  | 0.79  | 0.4453 | -0.0054356         | 0.0116106 F(1 12)  | = 0.62  | -0.0299      |
| o3                                       | -0.0046141 | 0.005305   | -0.87 | 0.3938 | -0.015616          | 0.0063879 F(1 22)  | = 0.76  | -0.0107      |
| no2                                      | 0.0005541  | 0.0028917  | 0.19  | 0.8506 | -0.0056095         | 0.0067178 F(1 15)  | = 0.04  | -0.0641      |
| co                                       | -0.00207   | 0.0021625  | -0.96 | 0.3511 | -0.0066132         | 0.0024733 F(1 18)  | = 0.92  | -0.0044      |
| soil ph                                  | -0.0070004 | 0.005321   | -1.32 | 0.1983 | -0.0178674         | 0.0038665 F(1 30)  | = 1.73  | 0.023        |
| soil organic carbon density              | 0.0094914  | 0.0060813  | 1.56  | 0.1291 | -0.0029283         | 0.0219111 F(1 30)  | = 2.44  | 0.0443       |
| soil organic carbon                      | 0.0001972  | 0.0002953  | 0.67  | 0.51   | -0.0004088         | 0.0008031 F(1 27)  | = 0.45  | -0.0202      |
| soil total carbon                        | 0.0000177  | 0.0001828  | 0.1   | 0.9236 | -0.0003574         | 0.0003928 F(1 27)  | = 0.01  | -0.0367      |
| soil total phosphorus                    | -0.0000521 | 0.000173   | -0.3  | 0.7655 | -0.0004055         | 0.0003013 F(1 30)  | = 0.09  | -0.0302      |
| soil moisture(0-10cm)                    | -0.0134004 | 0.0134071  | -1    | 0.3261 | -0.0408637         | 0.0140629 F(1 28)  | = 1.00  | 0            |
| soil moisture(10-40cm)                   | -0.002898  | 0.00491    | -0.59 | 0.5598 | -0.0129556         | 0.0071996 F(1 28)  | = 0.35  | -0.023       |
| soil tmp                                 | 0.0105299  | 0.0064847  | 1.62  | 0.1156 | -0.0027535         | 0.0238133 F(1 28)  | = 2.64  | 0.0534       |
| precipitation                            | -9.48E-06  | 0.0000365  | -0.15 | 0.8824 | -0.0001392         | 0.0001102 F(1 30)  | = 0.02  | -0.0326      |
| SDP                                      | -0.0001798 | 0.0012826  | -0.14 | 0.8894 | -0.0027992         | 0.0024395 F(1 30)  | = 0.02  | -0.0327      |
| PCI                                      | -0.0023285 | 0.005398   | -0.43 | 0.6693 | -0.0133528         | 0.0086958 F(1 30)  | = 0.19  | -0.027       |
| urban-rural temperature difference day   | 0.0169377  | 0.0438408  | 0.39  | 0.7028 | -0.073754          | 0.1076293 F(1 23)  | = 0.15  | -0.0368      |
| urban-rural temperature difference night | -0.0501808 | 0.0393868  | -1.27 | 0.2154 | -0.1316586         | 0.031297 F(1 23)   | = 1.62  | 0.0253       |
| greenness fraction                       | 0.1906729  | 0.2287655  | 0.83  | 0.4112 | -0.2765286         | 0.6578744 F(1 30)  | = 0.69  | -0.0099      |
| DHI                                      | 0.2138958  | 0.0882885  | 2.42  | 0.0217 | 0.0335866          | 0.394205 F(1 30)   | = 5.87  | 0.1358       |
| DNI                                      | -0.0065982 | 0.0346694  | -0.19 | 0.8503 | -0.0774026         | 0.0642062 F(1 30)  | = 0.04  | -0.0321      |
| GHI                                      | 0.08391    | 0.0500537  | 1.68  | 0.1041 | -0.0183134         | 0.1861333 F(1 30)  | = 2.81  | 0.0552       |
| UVindex                                  | 0.0392898  | 0.0136228  | 2.88  | 0.0072 | 0.0114682          | 0.0671113 F(1 30)  | = 8.32  | 0.191        |
| wet                                      | -0.0051056 | 0.0095263  | -0.54 | 0.5959 | -0.0245609         | 0.0143497 F(1 30)  | = 0.29  | -0.0235      |
| pet                                      | 0.0092296  | 0.0443311  | 0.21  | 0.8365 | -0.0813066         | 0.0997657 F(1 30)  | = 0.04  | -0.0318      |
| RH                                       | 0.003983   | 0.0047825  | 0.83  | 0.4139 | -0.0059353         | 0.0139014 F(1 22)  | = 0.69  | -0.0135      |
| vap                                      | 0.0099654  | 0.0063885  | 1.56  | 0.1293 | -0.0030817         | 0.0230124 F(1 30)  | = 2.43  | 0.0442       |
| temperature                              | 0.0096857  | 0.0063083  | 1.54  | 0.1352 | -0.0031976         | 0.0225691 F(1 30)  | = 2.36  | 0.042        |
| fire carbon emissions                    | -0.0007051 | 0.0010296  | -0.68 | 0.4987 | -0.0028079         | 0.0013976 F(1 30)  | = 0.47  | -0.0174      |
| GDP                                      | -0.0054163 | 0.0016301  | -3.32 | 0.0024 | -0.0087502         | -0.0020824 F(1 29) | = 11.04 | 0.2508       |
| anti consum                              | -0.008597  | 0.0060538  | -1.42 | 0.1659 | -0.0209605         | 0.0037665 F(1 30)  | = 2.02  | 0.0318       |
| coastal city                             | -0.043587  | 0.0870847  | -0.5  | 0.6204 | -0.2214377         | 0.1342637 F(1 30)  | = 0.25  | -0.0248      |
| main clima-l                             | 0.2621567  | 0.1975393  | 1.33  | 0.1952 | -0.1424841         | 0.6667975 F(3 28)  | = 1.08  | 0.0074       |
| main climate snow                        | 0.0194918  | 0.209522   | 0.09  | 0.9265 | -0.4096946         | 0.4486783          |         |              |
| main climate warm                        | 0.156947   | 0.1794239  | 0.87  | 0.3929 | -0.2118386         | 0.523228           |         |              |
| soil type Andisols                       | -0.1438864 | 0.1819034  | -0.79 | 0.437  | -0.5201823         | 0.2324095 F(8 23)  | = 0.81  | -0.0521      |
| soil type Entisols                       | -0.1515348 | 0.1670889  | -0.91 | 0.3739 | -0.4971846         | 0.194115           |         |              |
| soil type Inceptisols                    | 0.050131   | 0.1419963  | 0.39  | 0.702  | -0.2387328         | 0.348759           |         |              |
| soil type Gelisols                       | -0.2010034 | 0.2083965  | -0.96 | 0.3448 | -0.6321045         | 0.2300978          |         |              |
| soil type Oxisols                        | -0.2821162 | 0.2728551  | -1.03 | 0.3119 | -0.84656           | 0.2823276          |         |              |
| soil type Spodosols                      | -0.2795963 | 0.2083965  | -1.34 | 0.1928 | -0.7106974         | 0.1515047          |         |              |
| soil type Ultisols                       | -0.1106915 | 0.1508263  | -0.73 | 0.4704 | -0.4226995         | 0.2013166          |         |              |
| soil type Vertisols                      | -0.2713936 | 0.2728551  | -0.99 | 0.3303 | -0.8358374         | 0.2930502          |         |              |
| vegetation Forests                       | 0.0981711  | 0.2491865  | 0.39  | 0.6965 | -0.4114726         | 0.6078148 F(8 29)  | = 0.77  | -0.0153      |
| vegetation Grasslands                    | 0.2481225  | 0.2735788  | 0.91  | 0.3719 | -0.311409          | 0.807654           |         |              |
| Europe                                   | 0.0671889  | 0.0983851  | 0.68  | 0.5009 | -0.135439          | 0.2698167 F(6 25)  | = 3.19  | 0.2978       |
| the Middle East                          | -0.0167189 | 0.2175376  | -0.08 | 0.9394 | -0.4647459         | 0.4313081          |         |              |
| North America                            | -0.0197425 | 0.1191502  | -0.17 | 0.8697 | -0.265137          | 0.225652           |         |              |

|                                         |              |                  |          |               |                             |                    |          |                     |         |
|-----------------------------------------|--------------|------------------|----------|---------------|-----------------------------|--------------------|----------|---------------------|---------|
| soil total carbon                       | 0.0003468    | 0.0001976        | 1.75     | 0.0907        | -0.0000588                  | 0.0007523 F(1 27)  | =        | 3.08                | 0.0691  |
| soil total phosphorus                   | 0.0000876    | 0.0001903        | 0.46     | 0.6485        | -0.000301                   | 0.0004763 F(1 30)  | =        | 0.21                | -0.0261 |
| soil moisture(0-10cm)                   | -0.0009161   | 0.0149296        | -0.26    | 0.7951        | -0.0345123                  | 0.02666 F(1 28)    | =        | 0.07                | -0.0332 |
| soil moisture(10-40cm)                  | -0.0026254   | 0.0053916        | -0.49    | 0.6253        | -0.0137085                  | 0.0083817 F(1 28)  | =        | 0.24                | -0.0268 |
| soil tmp                                | -0.0021125   | 0.0074241        | -0.28    | 0.7781        | -0.01732                    | 0.0130951 F(1 30)  | =        | 0.08                | -0.0327 |
| precipitation                           | -0.0000583   | 0.0000692        | -0.84    | 0.4066        | -0.0001996                  | 0.0000831 F(1 30)  | =        | 0.71                | -0.0095 |
| SDP                                     | -0.0010764   | 0.0014001        | -0.77    | 0.448         | -0.0093358                  | 0.0017829 F(1 30)  | =        | 0.59                | -0.0134 |
| PCI                                     | -0.0038154   | 0.005926         | -0.64    | 0.5246        | -0.0159178                  | 0.0082871 F(1 30)  | =        | 0.41                | -0.0192 |
| urban-rural temperature difference day  | -0.009655    | 0.0441136        | -0.22    | 0.8287        | -0.100911                   | 0.0816009 F(1 23)  | =        | 0.05                | -0.0413 |
| urban-rural temperature difference high | -0.0713513   | 0.0381159        | -1.87    | 0.074         | -0.1502001                  | 0.0074975 F(1 23)  | =        | 3.50                | 0.0945  |
| greenness fraction                      | 0.3164111    | 0.2483595        | 1.27     | 0.2124        | -0.1908068                  | 0.823629 F(1 30)   | =        | 1.62                | 0.0197  |
| DHI                                     | 0.0278914    | 0.1062597        | 0.26     | 0.7947        | -0.1891197                  | 0.2449026 F(1 30)  | =        | 0.07                | -0.031  |
| DNI                                     | -0.0195241   | 0.0380604        | -0.51    | 0.6117        | -0.0972537                  | 0.0582056 F(1 30)  | =        | 0.26                | -0.0243 |
| GHI                                     | -0.0121414   | 0.0576396        | -0.21    | 0.8346        | -0.129857                   | 0.1055743 F(1 30)  | =        | 0.04                | -0.0318 |
| UVindex                                 | 0.0063091    | 0.0169265        | 0.37     | 0.712         | -0.0282593                  | 0.0408776 F(1 30)  | =        | 0.14                | -0.0286 |
| wet                                     | -0.0008297   | 0.0105465        | -0.08    | 0.9378        | -0.0223686                  | 0.0207091 F(1 30)  | =        | 0.01                | -0.0331 |
| pet                                     | -0.0438002   | 0.0482273        | -0.91    | 0.371         | -0.1422934                  | 0.0546931 F(1 30)  | =        | 0.82                | -0.0057 |
| RH                                      | 0.0001147    | 0.0070352        | 0.02     | 0.9871        | -0.0144755                  | 0.0147048 F(1 22)  | =        | 0.00                | -0.0454 |
| vap                                     | -0.0025223   | 0.0073052        | -0.35    | 0.7323        | -0.0174416                  | 0.0123969 F(1 30)  | =        | 0.12                | -0.0292 |
| temperature                             | -0.0021261   | 0.0072029        | -0.29    | 0.7701        | -0.0168488                  | 0.0125966 F(1 30)  | =        | 0.09                | -0.0303 |
| fire carbon emissions                   | -0.0008297   | 0.0011333        | -0.73    | 0.4698        | -0.0031442                  | 0.0014849 F(1 30)  | =        | 0.54                | -0.0152 |
| GDP                                     | -0.0036783   | 0.002164         | -1.7     | 0.0999        | -0.0081041                  | 0.0007476 F(1 29)  | =        | 2.89                | 0.0592  |
| anti consum                             | 0.0010936    | 0.0068886        | 0.16     | 0.8749        | -0.0129748                  | 0.0151621 F(1 30)  | =        | 0.03                | -0.0325 |
| coastal city                            | -0.0695124   | 0.0955232        | -0.73    | 0.4724        | -0.2645967                  | 0.125572 F(1 30)   | =        | 0.53                | -0.0154 |
| main clima-l                            | 0.1248862    | 0.2101701        | 0.59     | 0.5571        | -0.3056277                  | 0.5554001 F(3 28)  | =        | 1.83                | 0.0747  |
| main climate snow                       | 0.0042832    | 0.222919         | 0.02     | 0.9848        | -0.4523458                  | 0.4609121          |          |                     |         |
| main climate warm                       | 0.2704211    | 0.1908965        | 1.42     | 0.1676        | -0.1206126                  | 0.6614547          |          |                     |         |
| soil type Andisols                      | 0.2084043    | 0.1855469        | 1.12     | 0.2729        | -0.1754288                  | 0.5922374 F(8 23)  | =        | 1.42                | 0.0985  |
| soil type Entisols                      | 0.0088182    | 0.1704357        | 0.05     | 0.9592        | -0.343755                   | 0.3613914          |          |                     |         |
| soil type Inceptisols                   | 0.2867371    | 0.1448425        | 1.98     | 0.0598        | -0.0128926                  | 0.5863667          |          |                     |         |
| soil type Gelisols                      | -0.0639693   | 0.2125707        | -0.3     | 0.7662        | -0.5037054                  | 0.3757667          |          |                     |         |
| soil type Oxisols                       | -0.1312561   | 0.2783204        | -0.47    | 0.6417        | -0.7070057                  | 0.4444936          |          |                     |         |
| soil type Spodosols                     | -0.17447     | 0.2125707        | -0.82    | 0.4202        | -0.6142061                  | 0.265266           |          |                     |         |
| soil type Ultisols                      | 0.0687956    | 0.1538474        | 0.45     | 0.6589        | -0.249462                   | 0.3870532          |          |                     |         |
| soil type Vertisols                     | -0.1941931   | 0.2783204        | -0.7     | 0.4923        | -0.7699428                  | 0.3815565          |          |                     |         |
| vegetation Forests                      | 0.1734625    | 0.2798668        | 0.62     | 0.5402        | -0.3989295                  | 0.7458545 F(2 29)  | =        | 0.20                | -0.0547 |
| vegetation Grasslands                   | 0.1797243    | 0.3072623        | 0.58     | 0.5631        | -0.4486977                  | 0.8081464          |          |                     |         |
| Europe                                  | 0.1768173    | 0.1222692        | 1.45     | 0.1606        | -0.0750008                  | 0.4286354 F(6 25)  | =        | 1.62                | 0.1069  |
| the Middle East                         | -0.0795129   | 0.2703473        | -0.29    | 0.7711        | -0.6363036                  | 0.4772779          |          |                     |         |
| North America                           | 0.0014728    | 0.1480753        | 0.01     | 0.9921        | -0.3034941                  | 0.3064396          |          |                     |         |
| Oceania                                 | -0.2009414   | 0.2027605        | -0.99    | 0.3312        | -0.6185345                  | 0.2166516          |          |                     |         |
| South America                           | 0.3331083    | 0.1585052        | 2.1      | 0.0458        | 0.0066608                   | 0.6595558          |          |                     |         |
| Sub Saharan Africa                      | 0.0272903    | 0.2027605        | 0.13     | 0.894         | -0.3903028                  | 0.4448833          |          |                     |         |
| <b>Beta-lactams prevalence</b>          |              |                  |          |               |                             |                    |          |                     |         |
|                                         | <b>Coef.</b> | <b>Std. Err.</b> | <b>t</b> | <b>P&gt;t</b> | <b>[95% Conf. Interval]</b> |                    | <b>F</b> | <b>AdjR-squared</b> |         |
| city longitude                          | -0.0009242   | 0.0004838        | -1.91    | 0.0657        | -0.0019123                  | 0.0000639 F(1 30)  | =        | 3.65                | 0.0787  |
| city latitude                           | -0.0014872   | 0.001426         | -1.04    | 0.3053        | -0.0043996                  | 0.0014252 F(1 30)  | =        | 1.09                | 0.0028  |
| city total population                   | 0.0023047    | 0.0012371        | 1.86     | 0.073         | -0.0002294                  | 0.0048388 F(1 28)  | =        | 3.47                | 0.0785  |
| city population density                 | -9.51E-06    | 8.54E-06         | -1.11    | 0.2757        | -0.0000027                  | 0.00000802 F(1 27) | =        | 1.24                | 0.0084  |
| city ave june temp                      | -0.01046     | 0.0062484        | -1.67    | 0.1057        | -0.0232807                  | 0.0023608 F(1 27)  | =        | 2.80                | 0.0605  |
| pm25                                    | 0.0028103    | 0.0023121        | 1.22     | 0.2337        | -0.0019116                  | 0.0075322 F(1 30)  | =        | 1.48                | 0.0152  |
| pm10                                    | 0.0034599    | 0.0031308        | 1.11     | 0.2895        | -0.0033516                  | 0.0102913 F(1 12)  | =        | 1.23                | 0.0173  |
| o3                                      | -0.0058371   | 0.0052617        | -1.11    | 0.2793        | -0.0167492                  | 0.0050575 F(1 22)  | =        | 1.23                | 0.0099  |
| no2                                     | 0.000596     | 0.0022799        | 0.26     | 0.7973        | -0.0042634                  | 0.0054554 F(1 15)  | =        | 0.07                | -0.0618 |
| co                                      | -0.0011913   | 0.001869         | -0.64    | 0.5319        | -0.005118                   | 0.0027354 F(1 18)  | =        | 0.41                | -0.0323 |
| soil ph                                 | -0.0024805   | 0.0050136        | -0.49    | 0.6244        | -0.0127195                  | 0.0077586 F(1 30)  | =        | 0.24                | -0.0225 |
| soil organic carbon density             | 0.0150318    | 0.0051287        | 2.93     | 0.0064        | 0.0045576                   | 0.0255061 F(1 30)  | =        | 8.59                | 0.1967  |
| soil organic carbon                     | 0.0003635    | 0.0002625        | 1.39     | 0.1774        | -0.0001075                  | 0.000902 F(1 27)   | =        | 1.92                | 0.0318  |
| soil total carbon                       | 0.0000483    | 0.0001636        | 0.3      | 0.7699        | -0.0002874                  | 0.0003841 F(1 27)  | =        | 0.09                | -0.0337 |
| soil total phosphorus                   | -0.0000717   | 0.0001589        | -0.45    | 0.6552        | -0.0003961                  | 0.0002528 F(1 30)  | =        | 0.20                | -0.0264 |
| soil moisture(0-10cm)                   | -0.001787    | 0.0124986        | -0.14    | 0.8873        | -0.0273893                  | 0.0238153 F(1 28)  | =        | 0.02                | -0.035  |
| soil moisture(10-40cm)                  | 0.0003705    | 0.0045267        | 0.08     | 0.9354        | -0.0089021                  | 0.009643 F(1 28)   | =        | 0.01                | -0.0355 |
| soil tmp                                | 0.0014273    | 0.0062101        | 0.23     | 0.8199        | -0.0112935                  | 0.0141481 F(1 28)  | =        | 0.05                | -0.0338 |
| precipitation                           | -0.0000113   | 0.0000584        | -0.19    | 0.8478        | -0.0001306                  | 0.000108 F(1 30)   | =        | 0.04                | -0.032  |
| SDP                                     | 0.0001334    | 0.00118          | 0.11     | 0.9108        | -0.0022765                  | 0.0025432 F(1 30)  | =        | 0.01                | -0.0329 |
| PCI                                     | -0.0019581   | 0.0049682        | -0.39    | 0.6963        | -0.0121044                  | 0.0081882 F(1 30)  | =        | 0.16                | -0.028  |
| urban-rural temperature difference day  | 0.0031772    | 0.039596         | 0.08     | 0.9367        | -0.0787334                  | 0.0850879 F(1 23)  | =        | 0.01                | -0.0432 |
| urban-rural temperature difference high | -0.0721536   | 0.0334672        | -2.16    | 0.0418        | -0.1413858                  | -0.0029215 F(1 23) | =        | 4.65                | 0.1319  |
| greenness fraction                      | 0.2551016    | 0.2077048        | 1.23     | 0.2289        | -0.1690882                  | 0.6792914 F(1 30)  | =        | 1.51                | 0.0161  |
| DHI                                     | 0.1187903    | 0.0861173        | 1.38     | 0.178         | -0.0570847                  | 0.2946652 F(1 30)  | =        | 1.90                | 0.0283  |
| DNI                                     | -0.0231633   | 0.03163          | -0.73    | 0.4697        | -0.0877603                  | 0.0414338 F(1 30)  | =        | 0.54                | -0.0152 |
| GHI                                     | 0.0205635    | 0.0480059        | 0.43     | 0.6715        | -0.0774776                  | 0.1186047 F(1 30)  | =        | 0.18                | -0.0271 |
| UVindex                                 | 0.0267416    | 0.0132946        | 2.01     | 0.0533        | -0.0004096                  | 0.0538927 F(1 30)  | =        | 4.05                | 0.0895  |
| wet                                     | 0.0020576    | 0.0088049        | 0.03     | 0.976         | -0.0177144                  | 0.0182497 F(1 30)  | =        | 0.00                | -0.0333 |
| pet                                     | -0.0232277   | 0.040459         | -0.72    | 0.4756        | -0.111856                   | 0.0534005 F(1 30)  | =        | 0.52                | -0.0157 |
| RH                                      | 0.0042762    | 0.0047815        | 0.89     | 0.3808        | -0.0056389                  | 0.0141924 F(1 22)  | =        | 0.80                | 0.0088  |
| vap                                     | 0.0040904    | 0.0060646        | 0.67     | 0.5052        | -0.0082951                  | 0.016476 F(1 30)   | =        | 0.45                | -0.0179 |
| temperature                             | 0.0022679    | 0.0060125        | 0.38     | 0.7087        | -0.0100112                  | 0.014547 F(1 30)   | =        | 0.14                | -0.0285 |
| fire carbon emissions                   | -0.0003685   | 0.0009521        | -0.39    | 0.7015        | -0.002313                   | 0.001576 F(1 30)   | =        | 0.15                | -0.0282 |
| GDP                                     | -0.0036835   | 0.0017857        | -2.07    | 0.0476        | -0.0073456                  | -0.0000413 F(1 29) | =        | 4.28                | 0.0985  |
| anti consum                             | 0.0009915    | 0.0054561        | -1.83    | 0.077         | -0.0211344                  | 0.0011514 F(1 30)  | =        | 3.35                | 0.0706  |
| coastal city                            | -0.0738394   | 0.0793048        | -0.93    | 0.3592        | -0.2358014                  | 0.0881227 F(1 30)  | =        | 0.87                | -0.0043 |
| main clima-l                            | 0.1273226    | 0.1901703        | 0.67     | 0.5086        | -0.2622237                  | 0.5168688 F(8 28)  | =        | 0.17                | -0.0871 |
| main climate snow                       | 0.0719559    | 0.2017061        | 0.36     | 0.724         | -0.3412203                  | 0.4851321          |          |                     |         |
| main climate warm                       | 0.0702932    | 0.1727308        | 0.41     | 0.6871        | -0.2835297                  | 0.4241162          |          |                     |         |
| soil type Andisols                      | -0.0609727   | 0.1781388        | -0.34    | 0.7353        | -0.4294808                  | 0.3075354 F(8 23)  | =        | 0.37                | -0.1923 |
| soil type Entisols                      | 0.0174918    | 0.1636309        | 0.11     | 0.9158        | -0.3210045                  | 0.3559881          |          |                     |         |
| soil type Inceptisols                   | 0.1284018    | 0.1390595        | 0.92     | 0.3654        | -0.1592647                  | 0.4160683          |          |                     |         |
| soil type Gelisols                      | 0.0085036    | 0.2040836        | 0.04     | 0.9671        | -0.4136755                  | 0.4306826          |          |                     |         |
| soil type Oxisols                       | -0.137424    | 0.2672081        | -0.51    | 0.612         | -0.6901861                  | 0.1453381          |          |                     |         |
| soil type Spodosols                     | 0.0725671    | 0.2040836        | 0.36     | 0.7254        | -0.3496119                  | 0.4947462          |          |                     |         |
| soil type Ultisols                      | 0.0455251    | 0.1477049        | 0.31     | 0.7607        | -0.2600257                  | 0.3510758          |          |                     |         |
| soil type Vertisols                     | -0.163065    | 0.2672081        | -0.61    | 0.5477        | -0.7158272                  | 0.3896971          |          |                     |         |
| vegetation Forests                      | 0.1056231    | 0.2255101        | 0.47     | 0.643         | -0.3555968                  | 0.5668429 F(2 29)  | =        | 1.27                | 0.0173  |
| vegetation Grasslands                   | 0.2824027    | 0.2475847        | 1.14     | 0.2634        | -0.2239648                  | 0.7887703          |          |                     |         |
| Europe                                  | 0.0218144    | 0.0925804        | 0.24     | 0.8156        | -0.1688585                  | 0.2124872 F(6 25)  | =        | 2.87                | 0.2653  |
| the Middle East                         | -0.0644197   | 0.2047029        | -0.31    | 0.7556        | -0.4860132                  | 0.3571738          |          |                     |         |
| North America                           | 0.0017727    | 0.1121204        | 0.02     | 0.9875        | -0.2291436                  | 0.232689           |          |                     |         |
| Oceania                                 | -0.1358482   | 0.1535272        | -0.88    | 0.3847        | -0.4520434                  | 0.1803469          |          |                     |         |
| South America                           | 0.3825841    | 0.1200177        | 3.19     | 0.0038        | 0.135403                    | 0.6297856          |          |                     |         |
| Sub Saharan Africa                      | 0.238481     | 0.1535272        | 1.55     | 0.1329        | -0.0777141                  | 0.5546762          |          |                     |         |
| <b>Beta-lactams prevalence</b>          |              |                  |          |               |                             |                    |          |                     |         |
|                                         | <b>Coef.</b> | <b>Std. Err.</b> | <b>t</b> | <b>P&gt;t</b> | <b>[95% Conf. Interval]</b> |                    | <b>F</b> | <b>AdjR-squared</b> |         |
| city longitude                          | -0.0007284   | 0.0004698        | -1.55    | 0.1315        | -0.0016878                  | 0.0002311 F(1 30)  | =        | 2.40                | 0.0433  |
| city latitude                           | -0.0031326   | 0.0012594        | -2.49    | 0.0187        | -0.0057047                  | -0.0005605 F(1 30) | =        | 6.19                | 0.1433  |
| city total population                   | 0.0023973    | 0.0011909        | 2.01     | 0.0538        | -0.0000422                  | 0.0048368 F(1 28)  | =        | 4.05                | 0.0952  |
| city population density                 | -6.66E-06    | 8.40E-06         | -0.79    | 0.4348        | -0.0000239                  | 0.0000106 F(1 27)  | =        | 0.63                | -0.0134 |
| city ave june temp                      | -0.0081829   | 0.0061904        | -1.32    | 0.1973        | -0.0208844                  | 0.0045187 F(1 27)  | =        | 1.75                | 0.026   |
| pm25                                    | 0.0032599    | 0.0021768        | 1.5      | 0.1447        | -0.0011856                  | 0.0077055 F(1 30)  | =        | 2.24                | 0.0385  |
| pm10                                    | 0.0042291    | 0.0029206        | 1.45     | 0.1732        | -0.0021344                  | 0.0105927 F(1 12)  | =        | 2.                  |         |

|                                         |            |           |       |        |                      |            |         |   |              |         |
|-----------------------------------------|------------|-----------|-------|--------|----------------------|------------|---------|---|--------------|---------|
| GHI                                     | 0.0684028  | 0.0441496 | 1.55  | 0.1318 | -0.0217627           | 0.1585683  | F(1 30) | = | 2.40         | 0.0432  |
| UVindex                                 | 0.038758   | 0.0114908 | 3.37  | 0.0021 | 0.0152906            | 0.0622255  | F(1 30) | = | 11.38        | 0.2598  |
| wet                                     | -0.004738  | 0.0082994 | -0.06 | 0.9553 | -0.0176073           | 0.0166596  | F(1 30) | = | 0.29         | -0.0332 |
| pet                                     | 0.0074753  | 0.0388611 | 0.19  | 0.8488 | -0.0718897           | 0.0686402  | F(1 30) | = | 0.04         | -0.0321 |
| RH                                      | 0.0035716  | 0.0040861 | 0.87  | 0.3915 | -0.0049024           | 0.0120457  | F(1 22) | = | 0.76         | -0.1014 |
| vap                                     | 0.0074701  | 0.0056603 | 1.32  | 0.1969 | -0.0040898           | 0.0190299  | F(1 30) | = | 1.74         | 0.0234  |
| temperature                             | 0.0064697  | 0.0056197 | 1.15  | 0.2587 | -0.0050073           | 0.0179467  | F(1 30) | = | 1.33         | 0.1014  |
| fire carbon emissions                   | -0.0004884 | 0.0009051 | -0.54 | 0.5935 | -0.0023368           | 0.0013601  | F(1 30) | = | 0.29         | -0.0234 |
| GDP                                     | -0.0037313 | 0.0016898 | -2.21 | 0.0353 | -0.0071874           | -0.0002751 | F(1 29) | = | 4.88         | 0.1144  |
| anti consum                             | -0.0108229 | 0.0051132 | -2.12 | 0.0427 | -0.0212654           | -0.0003804 | F(1 30) | = | 4.48         | 0.1009  |
| coastal city                            | -0.0547944 | 0.0759937 | -0.72 | 0.4765 | -0.2099942           | 0.1004055  | F(1 30) | = | 0.52         | -0.0157 |
| main clima-l                            | 0.1375207  | 0.178254  | 0.77  | 0.4469 | -0.2276161           | 0.5026576  | F(3 28) | = | 0.49         | -0.052  |
| main climate snow                       | 0.0249832  | 0.189067  | 0.13  | 0.8958 | -0.362303            | 0.4122693  |         |   |              |         |
| main climate warm                       | 0.0189674  | 0.1619073 | 0.12  | 0.9076 | -0.3126846           | 0.3506195  |         |   |              |         |
| soil type Andisols                      | -0.0622595 | 0.1727697 | -0.36 | 0.7219 | -0.4196609           | 0.295142   | F(8 23) | = | 0.26         | -0.2353 |
| soil type Entisols                      | -0.020751  | 0.1586991 | -0.13 | 0.8971 | -0.3490451           | 0.3075432  |         |   |              |         |
| soil type Inceptisols                   | 0.0613602  | 0.1348683 | 0.45  | 0.6534 | -0.2176362           | 0.3403566  |         |   |              |         |
| soil type Gelisols                      | -0.0068312 | 0.1979326 | -0.03 | 0.9728 | -0.416286            | 0.4026236  |         |   |              |         |
| soil type Oxisols                       | -0.059873  | 0.2591546 | -0.23 | 0.8193 | -0.5959751           | 0.4762292  |         |   |              |         |
| soil type Spodosols                     | -0.0207483 | 0.1979326 | -0.1  | 0.9174 | -0.4302031           | 0.3887065  |         |   |              |         |
| soil type Ultisols                      | -0.0054285 | 0.1432531 | -0.04 | 0.9701 | -0.3017701           | 0.2909131  |         |   |              |         |
| soil type Vertisols                     | -0.2650012 | 0.2591546 | -1.02 | 0.3172 | -0.8011033           | 0.271101   |         |   |              |         |
| vegetation Forests                      | 0.028558   | 0.2186999 | 0.13  | 0.897  | -0.4187336           | 0.4758496  | F(2 29) | = | 0.73         | -0.018  |
| vegetation Grasslands                   | 0.1650808  | 0.2401079 | 0.69  | 0.4972 | -0.3259951           | 0.6561567  |         |   |              |         |
| Europe                                  | -0.0152013 | 0.0805688 | -0.19 | 0.8519 | -0.1811358           | 0.1507332  | F(6 25) | = | 4.26         | 0.3871  |
| the Middle East                         | 0.0234587  | 0.1781443 | 0.13  | 0.8963 | -0.3434362           | 0.3903537  |         |   |              |         |
| North America                           | 0.0102765  | 0.0975736 | 0.11  | 0.917  | -0.1906802           | 0.2112331  |         |   |              |         |
| Oceania                                 | 0.0258397  | 0.1338062 | 0.19  | 0.8482 | -0.2493315           | 0.3010109  |         |   |              |         |
| South America                           | 0.4210433  | 0.1044463 | 4.03  | 0.0005 | 0.2059321            | 0.6361545  |         |   |              |         |
| Sub Saharan Africa                      | 0.269295   | 0.1338062 | 2.02  | 0.0547 | -0.0058763           | 0.5444662  |         |   |              |         |
| Aminocoumarins rpkM                     |            |           |       |        |                      |            |         |   |              |         |
| Coef.                                   |            | Std. Err. | t     | P>t    | [95% Conf. Interval] |            | F       |   | AdjR-squared |         |
| city longitude                          | -0.0000579 | 0.000179  | -0.32 | 0.7486 | -0.0004235           | 0.0003077  | F(1 30) | = | 0.10         | -0.0297 |
| city latitude                           | -0.0005254 | 0.0004989 | -1.05 | 0.3007 | -0.0015442           | 0.0004934  | F(1 30) | = | 1.11         | 0.0035  |
| city total population                   | 0.0000318  | 0.0004648 | 0.07  | 0.946  | -0.0009204           | 0.0009839  | F(1 28) | = | 0.00         | -0.0355 |
| city population density                 | -2.39E-06  | 2.45E-06  | -0.98 | 0.3369 | -0.00000741          | 0.00000263 | F(1 27) | = | 0.96         | -0.0016 |
| city ave june temp                      | 0.0021823  | 0.0018221 | 1.2   | 0.2415 | -0.0015564           | 0.0059209  | F(1 27) | = | 1.43         | 0.0153  |
| pm25                                    | 0.0014166  | 0.0007874 | 1.8   | 0.0821 | -0.0001914           | 0.0030247  | F(1 30) | = | 3.24         | 0.0673  |
| pm10                                    | 0.0001726  | 0.0005621 | 0.31  | 0.764  | -0.001052            | 0.0013972  | F(1 12) | = | 0.09         | -0.0749 |
| o3                                      | -0.0023907 | 0.0017991 | -1.33 | 0.1975 | -0.0061217           | 0.0013404  | F(1 22) | = | 1.77         | 0.0322  |
| no2                                     | -0.0000147 | 0.0005294 | -0.03 | 0.9783 | -0.0011431           | 0.0011138  | F(1 15) | = | 0.00         | -0.0666 |
| co                                      | -0.0006034 | 0.0006971 | -0.87 | 0.3981 | -0.002068            | 0.0008612  | F(1 18) | = | 0.75         | -0.0134 |
| soil ph                                 | 0.0004515  | 0.0017597 | 0.26  | 0.7993 | -0.0031423           | 0.0040452  | F(1 30) | = | 0.07         | -0.0311 |
| soil organic carbon density             | -0.0018213 | 0.0020082 | -0.91 | 0.3717 | -0.0059226           | 0.00228    | F(1 30) | = | 0.82         | -0.0058 |
| soil organic carbon                     | -0.000017  | 0.0000957 | -0.18 | 0.8604 | -0.0002134           | 0.0001794  | F(1 27) | = | 0.03         | -0.0358 |
| soil total carbon                       | 0.0000483  | 0.0000567 | 0.85  | 0.4021 | -0.0000681           | 0.0001647  | F(1 27) | = | 0.72         | -0.0099 |
| soil total phosphorus                   | 7.11E-07   | 0.0000558 | 0.01  | 0.9899 | -0.0001132           | 0.0001146  | F(1 30) | = | 0.00         | -0.0333 |
| soil moisture(0-10cm)                   | -0.0109027 | 0.0038966 | -2.83 | 0.0086 | -0.0188027           | -0.0030027 | F(1 28) | = | 7.99         | 0.1943  |
| soil moisture(10-40cm)                  | -0.0032153 | 0.001462  | -2.2  | 0.0363 | -0.00621             | -0.0002205 | F(1 28) | = | 4.84         | 0.1168  |
| soil tmp                                | 0.0049596  | 0.0019613 | 2.53  | 0.0174 | 0.000942             | 0.0089773  | F(1 28) | = | 6.39         | 0.1598  |
| precipitation                           | 7.60E-06   | 0.0000204 | 0.37  | 0.7123 | -0.0000341           | 0.0000493  | F(1 30) | = | 0.14         | -0.0286 |
| SDP                                     | 0.000169   | 0.0004119 | 0.41  | 0.6844 | -0.0006721           | 0.0010102  | F(1 30) | = | 0.17         | -0.0276 |
| PCI                                     | -0.001254  | 0.001728  | -0.73 | 0.4737 | -0.0047829           | 0.002275   | F(1 30) | = | 0.53         | -0.0155 |
| urban-rural temperature difference day  | 0.0004907  | 0.0134028 | 0.04  | 0.9711 | -0.027235            | 0.0282165  | F(1 23) | = | 0.00         | -0.0434 |
| urban-rural temperature difference high | -0.0112333 | 0.012196  | -0.92 | 0.3666 | -0.0364627           | 0.0139961  | F(1 23) | = | 0.85         | -0.0064 |
| greenness fraction                      | 0.0665798  | 0.0734909 | 0.91  | 0.3722 | -0.0835087           | 0.2166683  | F(1 30) | = | 0.82         | -0.0058 |
| DHI                                     | 0.0852985  | 0.0268933 | 3.17  | 0.0035 | 0.030375             | 0.1402221  | F(1 30) | = | 10.06        | 0.2262  |
| DNI                                     | -0.0179573 | 0.010675  | -1.68 | 0.1029 | -0.0397586           | 0.0038441  | F(1 30) | = | 2.83         | 0.0557  |
| GHI                                     | 0.0124269  | 0.0166971 | 0.74  | 0.4625 | -0.0216731           | 0.0465269  | F(1 30) | = | 0.55         | -0.0146 |
| UVindex                                 | 0.0072369  | 0.0047768 | 1.52  | 0.1402 | -0.0025185           | 0.0169924  | F(1 30) | = | 2.30         | 0.0401  |
| wet                                     | -8.44E-06  | 0.0030812 | 0     | 0.9978 | -0.0063012           | 0.0062843  | F(1 30) | = | 0.00         | -0.0333 |
| pet                                     | 0.0031052  | 0.0142696 | 0.22  | 0.8292 | -0.0260372           | 0.0322477  | F(1 30) | = | 0.05         | -0.0317 |
| RH                                      | 0.0011746  | 0.0016646 | 0.71  | 0.4878 | -0.0022776           | 0.0046269  | F(1 22) | = | 0.50         | -0.0223 |
| vap                                     | 0.0057344  | 0.0018644 | 3.08  | 0.0045 | 0.0019267            | 0.0095421  | F(1 30) | = | 9.46         | 0.2144  |
| temperature                             | 0.0050218  | 0.0018993 | 2.64  | 0.0129 | 0.0011429            | 0.0089006  | F(1 30) | = | 6.99         | 0.162   |
| fire carbon emissions                   | 6.47E-07   | 0.0000334 | 0     | 0.9985 | -0.0006815           | 0.0006828  | F(1 30) | = | 0.00         | -0.0333 |
| GDP                                     | -0.0017892 | 0.0005805 | -3.08 | 0.0045 | -0.0029764           | -0.0006019 | F(1 29) | = | 9.50         | 0.2208  |
| anti consum                             | -0.0031005 | 0.001932  | -1.6  | 0.119  | -0.0070462           | 0.0008451  | F(1 30) | = | 2.58         | 0.0484  |
| coastal city                            | -0.0165686 | 0.0279871 | -0.59 | 0.5583 | -0.073726            | 0.0405887  | F(1 30) | = | 0.35         | -0.0214 |
| main clima-l                            | 0.1302151  | 0.056421  | 2.31  | 0.0286 | 0.0146441            | 0.2457861  | F(3 28) | = | 3.89         | 0.2187  |
| main climate snow                       | 0.0145067  | 0.0598424 | 0.24  | 0.8102 | -0.1080749           | 0.1370883  |         |   |              |         |
| main climate warm                       | 0.0301561  | 0.051246  | 0.59  | 0.5609 | -0.0748165           | 0.1351287  |         |   |              |         |
| soil type Andisols                      | -0.0160043 | 0.0589278 | -0.27 | 0.7884 | -0.1379057           | 0.1058971  | F(8 23) | = | 0.76         | -0.0654 |
| soil type Entisols                      | -0.0775198 | 0.0541286 | -1.43 | 0.1656 | -0.1894934           | 0.0344538  |         |   |              |         |
| soil type Inceptisols                   | -0.0690548 | 0.0460005 | -1.5  | 0.1469 | -0.1642241           | 0.0260944  |         |   |              |         |
| soil type Gelisols                      | -0.0989048 | 0.0675103 | -1.47 | 0.1564 | -0.2385604           | 0.0407508  |         |   |              |         |
| soil type Oxisols                       | -0.0867069 | 0.0883917 | -0.98 | 0.3368 | -0.269559            | 0.0961452  |         |   |              |         |
| soil type Spodosols                     | -0.0973949 | 0.0675103 | -1.44 | 0.1626 | -0.2370505           | 0.0422607  |         |   |              |         |
| soil type Ultisols                      | -0.0206948 | 0.0488603 | -0.42 | 0.6758 | -0.1217701           | 0.0803805  |         |   |              |         |
| soil type Vertisols                     | -0.0948548 | 0.0883917 | -1.07 | 0.2943 | -0.2770769           | 0.0879973  |         |   |              |         |
| vegetation Forests                      | 0.0277982  | 0.0676386 | 0.41  | 0.6841 | -0.1105382           | 0.1661346  | F(2 29) | = | 6.97         | 0.2781  |
| vegetation Grasslands                   | 0.1585622  | 0.0742595 | 2.14  | 0.0413 | 0.0066844            | 0.3104401  |         |   |              |         |
| Europe                                  | 0.0023754  | 0.0297685 | 0.08  | 0.937  | -0.058934            | 0.0636849  | F(6 25) | = | 4.16         | 0.3797  |
| the Middle East                         | -0.0327527 | 0.0658207 | -0.5  | 0.6231 | -0.1683129           | 0.1028076  |         |   |              |         |
| North America                           | -0.0247566 | 0.0360515 | -0.69 | 0.4986 | -0.099006            | 0.0494928  |         |   |              |         |
| Oceania                                 | -0.0398509 | 0.0493655 | -0.81 | 0.4271 | -0.1415211           | 0.0618193  |         |   |              |         |
| South America                           | 0.0326838  | 0.0385908 | 0.85  | 0.4051 | -0.0467954           | 0.1121631  |         |   |              |         |
| Sub Saharan Africa                      | 0.2080442  | 0.0493655 | 4.21  | 0.0003 | 0.1063739            | 0.3097144  |         |   |              |         |
| Aminoglycosides rpkM                    |            |           |       |        |                      |            |         |   |              |         |
| Coef.                                   |            | Std. Err. | t     | P>t    | [95% Conf. Interval] |            | F       |   | AdjR-squared |         |
| city longitude                          | -0.0001202 | 0.0002243 | -0.54 | 0.5959 | -0.0005782           | 0.0003378  | F(1 30) | = | 0.29         | -0.0235 |
| city latitude                           | -0.0001766 | 0.0006376 | -0.28 | 0.7837 | -0.0014787           | 0.0011254  | F(1 30) | = | 0.08         | -0.0307 |
| city total population                   | -0.0001133 | 0.0005863 | -0.19 | 0.8481 | -0.0013144           | 0.0010877  | F(1 28) | = | 0.04         | -0.0343 |
| city population density                 | -4.21E-06  | 3.79E-06  | -1.11 | 0.2763 | -0.0000012           | 0.00000357 | F(1 27) | = | 1.23         | 0.0083  |
| city ave june temp                      | 0.002324   | 0.0028775 | 0.81  | 0.4264 | -0.0035802           | 0.0082281  | F(1 27) | = | 0.65         | -0.0126 |
| pm25                                    | 0.0007815  | 0.0010317 | 0.76  | 0.4547 | -0.0013254           | 0.0028884  | F(1 30) | = | 0.57         | -0.0139 |
| pm10                                    | -0.001461  | 0.0022743 | -0.64 | 0.5327 | -0.0064161           | 0.0034942  | F(1 12) | = | 0.41         | -0.0373 |
| o3                                      | -0.0037351 | 0.0017649 | -2.12 | 0.0459 | -0.0073952           | -0.0000075 | F(1 22) | = | 4.48         | 0.1414  |
| no2                                     | -0.0019235 | 0.0017204 | -1.12 | 0.2811 | -0.0055904           | 0.0017435  | F(1 15) | = | 1.25         | 0.0154  |
| co                                      | -0.0004811 | 0.0003828 | -1.26 | 0.2249 | -0.0012854           | 0.0003231  | F(1 18) | = | 1.58         | 0.0296  |
| soil ph                                 | 0.0016941  | 0.002192  | 0.77  | 0.4456 | -0.0027825           | 0.0051707  | F(1 30) | = | 0.60         | -0.0132 |
| soil organic carbon density             | 0.003738   | 0.0024652 | 1.52  | 0.1399 | -0.0012966           | 0.0087727  | F(1 30) | = | 2.30         | 0.0402  |
| soil organic carbon                     | 0.0001715  | 0.0001159 | 1.48  | 0.1503 | -0.0000662           | 0.0004092  | F(1 27) | = | 2.19         | 0.0409  |
| soil total carbon                       | -0.0000571 | 0.0000769 | -0.74 | 0.464  | -0.0002149           | 0.0001007  | F(1 27) | = | 0.55         | -0.0163 |
| soil total phosphorus                   | 0.0000245  | 0.00007   | 0.35  | 0.7292 | -0.0001184           | 0.0001673  | F(1 30) | = | 0.12         | -0.0291 |
| soil moisture(0-10cm)                   | -0.0083482 | 0.0052717 | -1.58 | 0.1245 | -0.0191468           | 0.0024504  | F(1 28) | = | 2.51         | 0.0494  |
| soil moisture(10-40cm)                  | -0.0028784 | 0.00      |       |        |                      |            |         |   |              |         |





|                                          |              |                  |          |               |                   |                    |          |                     |  |  |  |  |
|------------------------------------------|--------------|------------------|----------|---------------|-------------------|--------------------|----------|---------------------|--|--|--|--|
| North America                            | 0.5731575    | 0.3148507        | 1.82     | 0.0807        | -0.0752896        | 1.221605           |          |                     |  |  |  |  |
| Oceania                                  | -0.0491203   | 0.4311271        | -0.11    | 0.9102        | -0.9370431        | 0.8388025          |          |                     |  |  |  |  |
| South America                            | 0.1155109    | 0.3370275        | 0.34     | 0.7347        | -0.5786103        | 0.8096521          |          |                     |  |  |  |  |
| Sub Saharan Africa                       | -0.0038836   | 0.4311271        | -0.02    | 0.9829        | -0.8973063        | 0.8785392          |          |                     |  |  |  |  |
| Multi-drug resistance rpkm               | <b>Coef.</b> | <b>Std. Err.</b> | <b>t</b> | <b>P&gt;t</b> | <b>[95% Conf.</b> | <b>Interval]</b>   | <b>F</b> | <b>AdjR-squared</b> |  |  |  |  |
| city longitude                           | -0.0002377   | 0.0004492        | -0.53    | 0.6007        | -0.0011551        | 0.0006798 F(1 30)  | = 0.28   | -0.0238             |  |  |  |  |
| city latitude                            | -0.0015428   | 0.0012472        | -1.24    | 0.2257        | -0.0040899        | 0.0010043 F(1 30)  | = 1.53   | 0.0168              |  |  |  |  |
| city total population                    | -0.0000814   | 0.001167         | -0.07    | 0.9449        | -0.0024719        | 0.0023091 F(1 28)  | = 0.00   | -0.0355             |  |  |  |  |
| city population density                  | -9.38E-06    | 6.44E-06         | -1.46    | 0.1569        | -0.0000226        | 0.00000384 F(1 27) | = 2.12   | 0.0385              |  |  |  |  |
| city ave june temp                       | 0.0029324    | 0.004995         | 0.59     | 0.562         | -0.0073166        | 0.0131813 F(1 27)  | = 0.34   | -0.024              |  |  |  |  |
| pm25                                     | 0.002634     | 0.0020298        | 1.3      | 0.2043        | -0.0015114        | 0.0067794 F(1 30)  | = 1.68   | 0.0216              |  |  |  |  |
| pm10                                     | -0.0012902   | 0.0016305        | -0.79    | 0.4441        | -0.0048428        | 0.0022624 F(1 12)  | = 0.63   | -0.0296             |  |  |  |  |
| o3                                       | -0.0123527   | 0.0039273        | -3.15    | 0.0047        | -0.0204975        | -0.0042079 F(1 22) | = 9.89   | 0.2788              |  |  |  |  |
| no2                                      | -0.0011642   | 0.002346         | -0.5     | 0.6269        | -0.0061646        | 0.0038362 F(1 15)  | = 0.25   | -0.0494             |  |  |  |  |
| co                                       | -0.0028436   | 0.0018068        | -1.57    | 0.1329        | -0.0066395        | 0.0009523 F(1 18)  | = 2.48   | 0.0721              |  |  |  |  |
| soil ph                                  | -0.0023904   | 0.0044123        | -0.54    | 0.592         | -0.0114015        | 0.0066207 F(1 30)  | = 0.29   | -0.0233             |  |  |  |  |
| soil organic carbon density              | 0.0004449    | 0.0051227        | 0.09     | 0.9314        | -0.0100171        | 0.0109069 F(1 30)  | = 0.01   | -0.0331             |  |  |  |  |
| soil organic carbon                      | 0.0002324    | 0.0002362        | 0.98     | 0.3339        | -0.0002522        | 0.0007169 F(1 27)  | = 0.97   | -0.0011             |  |  |  |  |
| soil total carbon                        | -0.0001231   | 0.0001248        | -0.99    | 0.3328        | -0.0003792        | 0.000133 F(1 27)   | = 0.97   | -0.001              |  |  |  |  |
| soil total phosphorus                    | -0.0001089   | 0.000139         | -0.78    | 0.4394        | -0.0003298        | 0.000175 F(1 30)   | = 0.61   | -0.0126             |  |  |  |  |
| soil moisture(0-10cm)                    | -0.0229967   | 0.0100822        | -2.28    | 0.0304        | -0.0436493        | -0.0023442 F(1 28) | = 5.20   | 0.1266              |  |  |  |  |
| soil moisture(10-40cm)                   | -0.0066128   | 0.0037738        | -1.75    | 0.0907        | -0.0143432        | 0.0011175 F(1 28)  | = 3.07   | 0.0666              |  |  |  |  |
| soil tmp                                 | 0.012004     | 0.0049644        | 2.42     | 0.0224        | 0.0018348         | 0.0221732 F(1 28)  | = 5.85   | 0.1432              |  |  |  |  |
| precipitation                            | 0.0000441    | 0.0000508        | 0.87     | 0.3922        | -0.0000597        | 0.000148 F(1 30)   | = 0.75   | -0.008              |  |  |  |  |
| SDP                                      | 0.0004554    | 0.0010362        | 0.44     | 0.6635        | -0.0016608        | 0.0025716 F(1 30)  | = 0.19   | -0.0267             |  |  |  |  |
| PCI                                      | -0.003713    | 0.0043345        | -0.86    | 0.3984        | -0.0125652        | 0.0051391 F(1 30)  | = 0.73   | -0.0087             |  |  |  |  |
| urban-rural temperature difference day   | 0.0099564    | 0.0349942        | 0.28     | 0.7783        | -0.0624247        | 0.0823575 F(1 23)  | = 0.08   | -0.0398             |  |  |  |  |
| urban-rural temperature difference night | 0.0024824    | 0.0324774        | 0.08     | 0.9397        | -0.0647023        | 0.069667 F(1 23)   | = 0.01   | -0.0432             |  |  |  |  |
| greenness fraction                       | -0.0204359   | 0.1874479        | -0.11    | 0.9139        | -0.4032556        | 0.3623838 F(1 30)  | = 0.01   | -0.0329             |  |  |  |  |
| DHI                                      | 0.2205964    | 0.0670528        | 3.29     | 0.0026        | 0.0836563         | 0.3575365 F(1 30)  | = 10.82  | 0.2406              |  |  |  |  |
| DNI                                      | -0.0472639   | 0.0267495        | -1.77    | 0.0874        | -0.1018937        | 0.007366 F(1 30)   | = 3.12   | 0.0641              |  |  |  |  |
| GHI                                      | 0.0295462    | 0.0420673        | 0.7      | 0.4879        | -0.0563666        | 0.115459 F(1 30)   | = 0.49   | -0.0166             |  |  |  |  |
| UVindex                                  | 0.0219333    | 0.011814         | 1.86     | 0.0732        | -0.0021942        | 0.0460607 F(1 30)  | = 3.45   | 0.0732              |  |  |  |  |
| wet                                      | 0.0048882    | 0.0077038        | 0.63     | 0.5306        | -0.010845         | 0.0206214 F(1 30)  | = 0.40   | -0.0196             |  |  |  |  |
| pet                                      | 0.0119757    | 0.0358775        | 0.33     | 0.7409        | -0.0612959        | 0.0852473 F(1 30)  | = 0.11   | -0.0295             |  |  |  |  |
| RH                                       | 0.0050071    | 0.0041221        | 1.22     | 0.2372        | -0.0035393        | 0.0135536 F(1 22)  | = 1.48   | 0.0203              |  |  |  |  |
| vap                                      | 0.0161692    | 0.0045           | 3.59     | 0.0012        | 0.0069789         | 0.0253595 F(1 30)  | = 12.91  | 0.2776              |  |  |  |  |
| temperature                              | 0.0125104    | 0.0047916        | 2.61     | 0.014         | 0.0027246         | 0.0222962 F(1 30)  | = 6.82   | 0.158               |  |  |  |  |
| fire carbon emissions                    | -0.0000476   | 0.0008407        | -0.06    | 0.9552        | -0.0017644        | 0.0016693 F(1 30)  | = 0.00   | -0.0332             |  |  |  |  |
| GDP                                      | -0.0022074   | 0.0016314        | -1.35    | 0.1865        | -0.0055439        | 0.0011291 F(1 29)  | = 1.83   | 0.0269              |  |  |  |  |
| anti consum                              | -0.0097622   | 0.0047433        | -2.06    | 0.0484        | -0.0194493        | -0.0000751 F(1 30) | = 4.24   | 0.0945              |  |  |  |  |
| coastal city                             | -0.0420943   | 0.070434         | -0.6     | 0.5546        | -0.1859398        | 0.1017511 F(1 30)  | = 0.36   | -0.0212             |  |  |  |  |
| main clima-l                             | 0.3206892    | 0.12169          | 2.64     | 0.0135        | 0.0714186         | 0.5699598 F(2 28)  | = 8.68   | 0.4262              |  |  |  |  |
| main climate snow                        | 0.0439629    | 0.1290717        | 0.34     | 0.7359        | -0.2204285        | 0.3083543          |          |                     |  |  |  |  |
| main climate warm                        | -0.0318369   | 0.1105304        | -0.29    | 0.7754        | -0.2582482        | 0.1945744          |          |                     |  |  |  |  |
| soil type Andisols                       | -0.2106242   | 0.1453926        | -1.45    | 0.1609        | -0.5113917        | 0.0901433 F(8 23)  | = 0.91   | -0.0238             |  |  |  |  |
| soil type Entisols                       | -0.2280561   | 0.1335516        | -1.71    | 0.1012        | -0.5043287        | 0.0482165          |          |                     |  |  |  |  |
| soil type Inceptisols                    | -0.1892938   | 0.1134971        | -1.67    | 0.1089        | -0.4240803        | 0.0454928          |          |                     |  |  |  |  |
| soil type Gelisols                       | -0.0493257   | 0.1665681        | -0.3     | 0.7698        | -0.3938982        | 0.2952467          |          |                     |  |  |  |  |
| soil type Oxisols                        | -0.2519452   | 0.2180989        | -1.16    | 0.2599        | -0.7030965        | 0.199206           |          |                     |  |  |  |  |
| soil type Spodosols                      | -0.1803512   | 0.1665681        | -1.08    | 0.2901        | -0.5249337        | 0.1642112          |          |                     |  |  |  |  |
| soil type Ultisols                       | -0.0219906   | 0.1205532        | -0.18    | 0.8569        | -0.2713738        | 0.2273927          |          |                     |  |  |  |  |
| soil type Vertisols                      | -0.2522153   | 0.2180989        | -1.16    | 0.2594        | -0.7033665        | 0.1989359          |          |                     |  |  |  |  |
| vegetation Forests                       | 0.0749745    | 0.171375         | 0.44     | 0.665         | -0.2755267        | 0.4254757 F(2 29)  | = 6.69   | 0.2684              |  |  |  |  |
| vegetation Grasslands                    | 0.3989175    | 0.1881505        | 2.12     | 0.0427        | 0.0141066         | 0.7837284          |          |                     |  |  |  |  |
| Europe                                   | -0.0642721   | 0.0750361        | -0.86    | 0.3998        | -0.2188119        | 0.0902677 F(6 25)  | = 4.14   | 0.3778              |  |  |  |  |
| the Middle East                          | -0.1132764   | 0.1659111        | -0.68    | 0.501         | -0.4549768        | 0.228424           |          |                     |  |  |  |  |
| North America                            | -0.0172779   | 0.0908733        | -0.19    | 0.8507        | -0.204435         | 0.1689791          |          |                     |  |  |  |  |
| Oceania                                  | -0.1225571   | 0.1244334        | -0.98    | 0.3341        | -0.3788324        | 0.1337182          |          |                     |  |  |  |  |
| South America                            | 0.0359857    | 0.097274         | 0.37     | 0.7145        | -0.164354         | 0.2363253          |          |                     |  |  |  |  |
| Sub Saharan Africa                       | 0.5014836    | 0.1244334        | 4.03     | 0.0005        | 0.2452083         | 0.757759           |          |                     |  |  |  |  |
| beta-lactams rpkm                        | <b>Coef.</b> | <b>Std. Err.</b> | <b>t</b> | <b>P&gt;t</b> | <b>[95% Conf.</b> | <b>Interval]</b>   | <b>F</b> | <b>AdjR-squared</b> |  |  |  |  |
| city longitude                           | -0.0000626   | 0.0000338        | -1.85    | 0.0744        | -0.0001317        | 0.00000656 F(1 30) | = 3.42   | 0.0723              |  |  |  |  |
| city latitude                            | -0.0000985   | 0.0000996        | -0.99    | 0.3305        | -0.0003019        | 0.0001049 F(1 30)  | = 0.98   | -0.0007             |  |  |  |  |
| city total population                    | 0.0000134    | 0.000093         | 0.14     | 0.8867        | -0.0001771        | 0.0002039 F(1 28)  | = 0.02   | -0.0349             |  |  |  |  |
| city population density                  | -8.70E-07    | 5.96E-07         | -1.46    | 0.1557        | -0.00000209       | 0.00000352 F(1 27) | = 2.13   | 0.0389              |  |  |  |  |
| city ave june temp                       | -0.0000194   | 0.0004651        | -0.04    | 0.967         | -0.0009737        | 0.0009348 F(1 27)  | = 0.00   | -0.037              |  |  |  |  |
| pm25                                     | 0.0000404    | 0.0001649        | 0.25     | 0.8081        | -0.0002964        | 0.0003773 F(1 30)  | = 0.06   | -0.0313             |  |  |  |  |
| pm10                                     | -0.0001055   | 0.0003274        | -0.32    | 0.7528        | -0.0008188        | 0.0006078 F(1 12)  | = 0.10   | -0.074              |  |  |  |  |
| o3                                       | -0.0007684   | 0.0003392        | -2.27    | 0.0337        | -0.0014718        | -0.0000649 F(1 22) | = 5.13   | 0.1523              |  |  |  |  |
| no2                                      | -0.0002792   | 0.0002393        | -1.17    | 0.2616        | -0.0007893        | 0.0002309 F(1 15)  | = 1.36   | 0.0221              |  |  |  |  |
| co                                       | -0.0002436   | 0.0001453        | -1.68    | 0.1109        | -0.0005488        | 0.0000616 F(1 18)  | = 2.81   | 0.0871              |  |  |  |  |
| soil ph                                  | 0.0000694    | 0.0003507        | 0.2      | 0.8445        | -0.0006468        | 0.0007856 F(1 30)  | = 0.04   | -0.032              |  |  |  |  |
| soil organic carbon density              | 0.0000853    | 0.0003719        | 0.23     | 0.8208        | -0.0001288        | 0.0018448 F(1 30)  | = 5.67   | 0.1398              |  |  |  |  |
| soil organic carbon                      | 0.0000185    | 0.0000187        | 0.99     | 0.3305        | -0.0000198        | 0.0000568 F(1 27)  | = 0.98   | -0.0006             |  |  |  |  |
| soil total carbon                        | -9.43E-06    | 9.88E-06         | -0.95    | 0.3485        | -0.0000297        | 0.0000108 F(1 27)  | = 0.91   | -0.0032             |  |  |  |  |
| soil total phosphorus                    | -8.34E-06    | 0.000011         | -0.76    | 0.4546        | -0.0000308        | 0.0000141 F(1 30)  | = 0.57   | -0.0139             |  |  |  |  |
| soil moisture(0-10cm)                    | -0.0000687   | 0.0008716        | -0.08    | 0.9377        | -0.001854         | 0.0017166 F(1 28)  | = 0.01   | -0.0355             |  |  |  |  |
| soil moisture(10-40cm)                   | 5.11E-07     | 0.0003156        | 0        | 0.9987        | -0.000646         | 0.000647 F(1 28)   | = 0.00   | -0.0357             |  |  |  |  |
| soil tmp                                 | 0.0002468    | 0.0004308        | 0.57     | 0.5713        | -0.0006357        | 0.0011293 F(1 28)  | = 0.33   | -0.0237             |  |  |  |  |
| precipitation                            | -5.09E-07    | 4.07E-06         | -0.12    | 0.9014        | -0.00000883       | 0.00000781 F(1 30) | = 0.02   | -0.0328             |  |  |  |  |
| SDP                                      | -0.0000212   | 0.0000822        | -0.26    | 0.7978        | -0.0001891        | 0.0001466 F(1 30)  | = 0.07   | -0.031              |  |  |  |  |
| PCI                                      | -0.0002209   | 0.0003449        | -0.64    | 0.5267        | -0.0009252        | 0.0004834 F(1 30)  | = 0.41   | -0.0194             |  |  |  |  |
| urban-rural temperature difference day   | 0.0020123    | 0.0027033        | 0.74     | 0.4642        | -0.0035799        | 0.0076044 F(1 23)  | = 0.55   | -0.0189             |  |  |  |  |
| urban-rural temperature difference night | 0.0008134    | 0.0025291        | 0.32     | 0.7506        | -0.0044183        | 0.0060452 F(1 23)  | = 0.10   | -0.0388             |  |  |  |  |
| greenness fraction                       | 0.0061391    | 0.0147963        | 0.41     | 0.6812        | -0.024079         | 0.0363571 F(1 30)  | = 0.17   | -0.0274             |  |  |  |  |
| DHI                                      | 0.0054088    | 0.0061114        | 0.89     | 0.3832        | -0.0070724        | 0.01789 F(1 30)    | = 0.78   | -0.007              |  |  |  |  |
| DNI                                      | -0.0005056   | 0.0022226        | -0.23    | 0.8216        | -0.0050448        | 0.0040336 F(1 30)  | = 0.05   | -0.0316             |  |  |  |  |
| GHI                                      | 0.0018154    | 0.0033403        | 0.54     | 0.5908        | -0.0050065        | 0.0086372 F(1 30)  | = 0.30   | -0.0233             |  |  |  |  |
| UVindex                                  | 0.0009494    | 0.000972         | 0.98     | 0.3365        | -0.0010356        | 0.0029344 F(1 30)  | = 0.95   | -0.0015             |  |  |  |  |
| wet                                      | 0.0000941    | 0.0006136        | 0.15     | 0.8792        | -0.001159         | 0.0013471 F(1 30)  | = 0.02   | -0.0325             |  |  |  |  |
| pet                                      | -0.0006467   | 0.0028424        | -0.23    | 0.8216        | -0.0064516        | 0.0051582 F(1 30)  | = 0.05   | -0.0316             |  |  |  |  |
| RH                                       | 0.0001505    | 0.0003376        | 0.45     | 0.6601        | -0.0005497        | 0.0008506 F(1 22)  | = 0.20   | -0.0361             |  |  |  |  |
| vap                                      | 0.0004609    | 0.0004176        | 1.1      | 0.2785        | -0.0003919        | 0.0013137 F(1 30)  | = 1.22   | 0.0007              |  |  |  |  |
| temperature                              | 0.0002529    | 0.0004176        | 0.61     | 0.5493        | -0.0005999        | 0.0011057 F(1 30)  | = 0.37   | -0.0209             |  |  |  |  |
| fire carbon emissions                    | -4.53E-06    | 0.0000665        | -0.07    | 0.9462        | -0.0001404        | 0.0001314 F(1 30)  | = 0.00   | -0.0332             |  |  |  |  |
| GDP                                      | -0.0001862   | 0.0001287        | -1.45    | 0.1588        | -0.0004495        | 0.0000771 F(1 29)  | = 2.09   | 0.0                 |  |  |  |  |

|                                          |            |           |       |        |                   |                    |      |        |         |
|------------------------------------------|------------|-----------|-------|--------|-------------------|--------------------|------|--------|---------|
| no2                                      | -0.0459912 | 0.0428867 | -1.07 | 0.3005 | -0.137402         | 0.0454196 F(1 15)  | =    | 1.15   | 0.0093  |
| co                                       | -0.0258214 | 0.0155232 | -1.66 | 0.1135 | -0.0584343        | 0.0067916 F(1 18)  | =    | 2.77   | 0.0851  |
| soil_ph                                  | 0.0176679  | 0.0588756 | 0.3   | 0.7862 | -0.102572         | 0.1379078 F(1 30)  | =    | 0.09   | -0.0302 |
| soil organic carbon density              | 0.1001246  | 0.0656357 | 1.52  | 0.1376 | -0.0339214        | 0.2341705 F(1 30)  | =    | 2.33   | 0.0411  |
| soil organic carbon                      | 0.0037859  | 0.003115  | 1.22  | 0.2347 | -0.0026055        | 0.0101773 F(1 27)  | =    | 1.48   | 0.0168  |
| soil total carbon                        | -0.0014238 | 0.0019576 | -0.73 | 0.4733 | -0.0054403        | 0.0025928 F(1 27)  | =    | 0.53   | -0.0171 |
| soil total phosphorus                    | -0.0001142 | 0.0018673 | -0.06 | 0.9516 | -0.0039276        | 0.0036992 F(1 30)  | =    | 0.00   | -0.0332 |
| soil moisture(0-10cm)                    | -0.2462577 | 0.1389963 | -1.77 | 0.0873 | -0.5309788        | 0.0384633 F(1 28)  | =    | 3.14   | 0.0687  |
| soil moisture(10-40cm)                   | -0.0775886 | 0.0510093 | -1.52 | 0.1395 | -0.1820765        | 0.0268992 F(1 28)  | =    | 2.31   | 0.0433  |
| soil tmp                                 | 0.0967586  | 0.0705407 | 1.37  | 0.1811 | -0.0477375        | 0.2412547 F(1 28)  | =    | 1.88   | 0.0295  |
| precipitation                            | 0.0002     | 6837      | 0.29  | 0.7719 | -0.0011963        | 0.0015962 F(1 30)  | =    | 0.09   | -0.0304 |
| SDP                                      | 0.0034331  | 0.01381   | 0.25  | 0.8054 | -0.0247706        | 0.0316368 F(1 30)  | =    | 0.06   | -0.0312 |
| PCI                                      | -0.0386582 | 0.0579148 | -0.67 | 0.5096 | -0.1569359        | 0.0796195 F(1 30)  | =    | 0.45   | -0.0182 |
| urban-rural temperature difference day   | -0.0776276 | 0.4677925 | -0.17 | 0.8697 | -1.04533          | 0.8900749 F(1 23)  | =    | 0.03   | -0.0422 |
| urban-rural temperature difference night | -0.0482972 | 0.4335824 | -0.11 | 0.9123 | -0.9452308        | 0.8486363 F(1 23)  | =    | 0.01   | -0.0429 |
| greenness fraction                       | 0.4789858  | 2.491761  | 0.19  | 0.8489 | -4.609869         | 5.567841 F(1 30)   | =    | 0.04   | -0.0321 |
| DHI                                      | 2.045616   | 0.9708431 | 2.11  | 0.0436 | 0.0628899         | 4.028342 F(1 30)   | =    | 4.44   | 0.0999  |
| DNI                                      | -0.3274127 | 0.3689737 | -0.89 | 0.3819 | -1.080956         | 0.4261308 F(1 30)  | =    | 0.79   | -0.0669 |
| GHI                                      | 0.3779607  | 0.5597807 | 0.68  | 0.5047 | -0.7652639        | 1.521185 F(1 30)   | =    | 0.46   | -0.0179 |
| UVindex                                  | 0.2008701  | 0.1617857 | 1.24  | 0.224  | -0.1295404        | 0.5312806 F(1 30)  | =    | 1.54   | 0.0172  |
| wet                                      | -0.0079838 | 0.1031246 | -0.08 | 0.9388 | -0.2185923        | 0.2026247 F(1 30)  | =    | 0.01   | -0.0331 |
| pet                                      | 0.0851104  | 0.4777539 | 0.18  | 0.8598 | -0.8905933        | 1.060814 F(1 30)   | =    | 0.03   | -0.0322 |
| RH                                       | 0.0418301  | 0.0382514 | 1.09  | 0.286  | -0.0374986        | 0.1211587 F(1 22)  | =    | 1.20   | 0.0084  |
| vap                                      | 0.1360833  | 0.0671215 | 2.03  | 0.0516 | -0.0009971        | 0.2731638 F(1 30)  | =    | 4.11   | 0.0912  |
| temperature                              | 0.1006469  | 0.068158  | 1.48  | 0.1502 | -0.0385503        | 0.2398442 F(1 30)  | =    | 2.18   | 0.0367  |
| fire carbon emissions                    | 3.55E-06   | 0.0111803 | 0     | 0.9997 | -0.0228297        | 0.0228368 F(1 30)  | =    | 0.00   | -0.0333 |
| GDP                                      | -0.0265774 | 0.02317   | -1.21 | 0.2351 | -0.0714026        | 0.0182479 F(1 29)  | =    | 1.47   | 0.0154  |
| anti consum                              | -0.0460191 | 0.0668568 | -0.69 | 0.4865 | -0.1825549        | 0.0905268 F(1 30)  | =    | 0.47   | -0.0173 |
| coastal city                             | -1.042357  | 0.9228172 | -1.13 | 0.2676 | -2.927001         | 0.842287 F(1 30)   | =    | 1.28   | 0.0088  |
| main clima-l                             | 3.614311   | 1.903531  | 1.9   | 0.0679 | -0.2848942        | 7.513517 F(3 28)   | =    | 3.68   | 0.2061  |
| main climate snow                        | 2.651843   | 2.018999  | 1.31  | 0.1997 | -1.483889         | 6.875755           |      |        |         |
| main climate warm                        | 0.3866446  | 1.728967  | 0.21  | 0.8327 | -3.172985         | 3.910274           |      |        |         |
| soil type Andisols                       | -2.240896  | 1.850589  | -1.21 | 0.2382 | -6.069131         | 1.587338 F(8 23)   | =    | 1.26   | 0.0621  |
| soil type Entisols                       | -2.519552  | 1.699874  | -1.48 | 0.1519 | -6.03601          | 0.9969063          |      |        |         |
| soil type Inceptisols                    | -1.965763  | 1.444615  | -1.36 | 0.1868 | -4.954178         | 1.022652           |      |        |         |
| soil type Gelisols                       | 2.782527   | 2.120116  | 1.31  | 0.2023 | -1.603266         | 7.168321           |      |        |         |
| soil type Oxisols                        | -2.580475  | 2.775883  | -0.93 | 0.3622 | -8.322827         | 3.161877           |      |        |         |
| soil type Spodosols                      | -2.716237  | 2.120116  | -1.28 | 0.2129 | -7.102031         | 1.669557           |      |        |         |
| soil type Ultisols                       | -0.6257448 | 1.534427  | -0.41 | 0.6872 | -3.799949         | 2.54846            |      |        |         |
| soil type Vertisols                      | -2.796249  | 2.775883  | -1.01 | 0.3243 | -8.538601         | 2.946103           |      |        |         |
| vegetation Forests                       | 0.8699278  | 2.482323  | 0.35  | 0.7285 | -4.206994         | 5.946849 F(2 29)   | =    | 3.36   | 0.1321  |
| vegetation Grasslands                    | 4.185414   | 2.725312  | 1.54  | 0.1354 | -1.388475         | 9.759303           |      |        |         |
| Europe                                   | -0.4615932 | 1.115731  | -0.41 | 0.6826 | -2.759485         | 1.836299 F(6 25)   | =    | 2.48   | 0.2222  |
| the Middle East                          | -0.8187459 | 2.466975  | -0.33 | 0.7427 | -5.899576         | 4.262084           |      |        |         |
| North America                            | 1.358042   | 1.351218  | 1.01  | 0.3245 | -1.424844         | 4.140927           |      |        |         |
| Oceania                                  | -1.055388  | 1.850231  | -0.57 | 0.5735 | -4.866011         | 2.755234           |      |        |         |
| South America                            | 0.9067007  | 1.446392  | 0.63  | 0.5364 | -2.0722           | 3.885601           |      |        |         |
| Sub Saharan Africa                       | 5.809938   | 1.850231  | 3.14  | 0.0043 | 1.999315          | 9.620561           |      |        |         |
| total prevalence of AMR class            |            |           |       |        |                   |                    |      |        |         |
| city longitude                           | -0.0092048 | 0.0055718 | -1.65 | 0.109  | -0.020584         | 0.0021744 F(1 30)  | =    | 2.73   | 0.0528  |
| city latitude                            | -0.0269881 | 0.0157347 | -1.71 | 0.0969 | -0.0591026        | 0.0051864 F(1 30)  | =    | 2.94   | 0.0588  |
| city total population                    | 0.0243278  | 0.0142861 | 1.7   | 0.0997 | -0.0049359        | 0.0539515 F(1 28)  | =    | 2.90   | 0.0615  |
| city population density                  | -0.0000707 | 0.0000977 | -0.72 | 0.4754 | -0.0002713        | 0.0001298 F(1 27)  | =    | 0.52   | -0.0173 |
| city ave june temp                       | -0.0622245 | 0.0731641 | -0.85 | 0.4025 | -0.2123448        | 0.0878959 F(1 27)  | =    | 0.72   | -0.01   |
| pm25                                     | 0.0457675  | 0.0255671 | 1.79  | 0.0835 | -0.0064475        | 0.0979826 F(1 30)  | =    | 3.20   | 0.0664  |
| pm10                                     | 0.0507927  | 0.0233145 | 2.18  | 0.05   | -0.0000052        | 0.1015906 F(1 12)  | =    | 4.75   | 0.2237  |
| o3                                       | -0.0752911 | 0.0468326 | -1.61 | 0.1222 | -0.172416         | 0.0218337 F(1 22)  | =    | 2.58   | 0.0645  |
| no2                                      | 0.0014694  | 0.0162363 | 0.09  | 0.9291 | -0.0331375        | 0.0360763 F(1 15)  | =    | 0.01   | -0.0661 |
| co                                       | -0.0185597 | 0.0176631 | -1.05 | 0.3073 | -0.0556684        | 0.018549 F(1 18)   | =    | 1.10   | 0.0054  |
| soil_ph                                  | -0.0503373 | 0.0564292 | -0.89 | 0.3795 | -0.165581         | 0.0649065 F(1 30)  | =    | 0.80   | -0.0066 |
| soil organic carbon density              | 0.1561776  | 0.0595937 | 2.62  | 0.0136 | 0.034471          | 0.2778841 F(1 30)  | =    | 6.87   | 0.1592  |
| soil organic carbon                      | 0.0035156  | 0.0030227 | 1.16  | 0.255  | -0.0026864        | 0.0097176 F(1 27)  | =    | 1.35   | 0.0124  |
| soil total carbon                        | 0.0003979  | 0.0018969 | 0.21  | 0.8354 | -0.0034941        | 0.0042899 F(1 27)  | =    | 0.04   | -0.0353 |
| soil total phosphorus                    | -0.0006906 | 0.0018062 | -0.38 | 0.7049 | -0.0043795        | 0.0029982 F(1 30)  | =    | 0.15   | -0.0283 |
| soil moisture(0-10cm)                    | -0.1113445 | 0.1404954 | -0.79 | 0.4347 | -0.3991362        | 0.1764473 F(1 28)  | =    | 0.63   | -0.013  |
| soil moisture(10-40cm)                   | -0.0238564 | 0.0512411 | -0.47 | 0.6451 | -0.1288191        | 0.0811062 F(1 28)  | =    | 0.22   | -0.0278 |
| soil tmp                                 | 0.0780239  | 0.0690698 | 1.13  | 0.2682 | -0.0634591        | 0.2195069 F(1 28)  | =    | 1.28   | 0.0094  |
| precipitation                            | 0.0000636  | 0.0006638 | 0.1   | 0.9242 | -0.0012919        | 0.0014192 F(1 30)  | =    | 0.01   | -0.033  |
| SDP                                      | 0.0040482  | 0.0133839 | 0.3   | 0.7644 | -0.0232853        | 0.0313816 F(1 30)  | =    | 0.09   | -0.0302 |
| PCI                                      | -0.0263739 | 0.0563656 | -0.47 | 0.6432 | -0.1414878        | 0.0887401 F(1 30)  | =    | 0.22   | -0.0258 |
| urban-rural temperature difference day   | 0.0981811  | 0.4562428 | 0.22  | 0.8315 | -0.8456291        | 1.041991 F(1 23)   | =    | 0.05   | -0.0414 |
| urban-rural temperature difference night | -0.8322231 | 0.3859466 | -2.16 | 0.0418 | -1.630614         | -0.0338318 F(1 23) | =    | 4.65   | 0.132   |
| greenness fraction                       | 2.749663   | 2.364857  | 1.16  | 0.2541 | -2.08002          | 7.579346 F(1 30)   | =    | 1.35   | 0.0112  |
| DHI                                      | 0.9158322  | 0.9108322 | 2.61  | 0.0162 | 0.0282927 F(1 30) | =                  | 6.78 | 0.1578 |         |
| DNI                                      | -0.2854323 | 0.3586366 | -0.8  | 0.4308 | -1.018966         | 0.4460014 F(1 30)  | =    | 0.64   | -0.0118 |
| GHI                                      | 0.648877   | 0.5338996 | 1.22  | 0.2337 | -0.4415114        | 1.739225 F(1 30)   | =    | 1.48   | 0.0152  |
| UVindex                                  | 0.4376128  | 0.1396049 | 3.13  | 0.0038 | 0.1525016         | 0.722774 F(1 30)   | =    | 9.83   | 0.2216  |
| wet                                      | -0.0006191 | 0.1000018 | -0.01 | 0.9951 | -0.2048501        | 0.2036119 F(1 30)  | =    | 0.00   | -0.0333 |
| pet                                      | -0.1338014 | 0.4628417 | -0.29 | 0.7745 | -1.07905          | 0.8114474 F(1 30)  | =    | 0.08   | -0.0305 |
| RH                                       | 0.0351019  | 0.0439369 | 0.8   | 0.4329 | -0.0560175        | 0.1262214 F(1 22)  | =    | 0.64   | -0.016  |
| vap                                      | 0.0986484  | 0.0670202 | 1.47  | 0.1515 | -0.0382251        | 0.2355219 F(1 30)  | =    | 2.17   | 0.0363  |
| temperature                              | 0.0821586  | 0.0667834 | 1.23  | 0.2282 | -0.0542313        | 0.2185484 F(1 30)  | =    | 1.51   | 0.0163  |
| fire carbon emissions                    | -0.0053221 | 0.010797  | -0.49 | 0.6257 | -0.0273725        | 0.0167284 F(1 30)  | =    | 0.24   | -0.025  |
| GDP                                      | -0.0638232 | 0.0182249 | -3.5  | 0.0015 | -0.1010975        | -0.026549 F(1 29)  | =    | 12.26  | 0.273   |
| anti consum                              | -0.1228213 | 0.0613702 | -2    | 0.0545 | -0.2481559        | 0.0025133 F(1 30)  | =    | 4.01   | 0.0884  |
| coastal city                             | -1.257858  | 0.8842786 | -1.42 | 0.1652 | -3.063796         | 0.5480796 F(1 30)  | =    | 2.02   | 0.032   |
| main clima-l                             | 2.637972   | 2.082419  | 1.27  | 0.2157 | -1.62767          | 6.903614 F(3 28)   | =    | 0.89   | -0.0105 |
| main climate snow                        | 0.3617338  | 2.208739  | 0.16  | 0.8711 | -4.162663         | 4.88613            |      |        |         |
| main climate warm                        | 1.457774   | 1.891451  | 0.77  | 0.4473 | -2.416687         | 5.332236           |      |        |         |
| soil type Andisols                       | -1.377261  | 1.987799  | -0.69 | 0.4953 | -5.489336         | 2.734813 F(8 23)   | =    | 0.49   | -0.151  |
| soil type Entisols                       | -1.122481  | 1.82591   | -0.61 | 0.5448 | -4.899663         | 2.654701           |      |        |         |
| soil type Inceptisols                    | 0.6086223  | 1.551725  | 0.39  | 0.6985 | -2.601365         | 3.81861            |      |        |         |
| soil type Gelisols                       | -1.417565  | 2.277309  | -0.62 | 0.5398 | -6.128538         | 3.293409           |      |        |         |
| soil type Oxisols                        | -2.047404  | 2.981698  | -0.69 | 0.4992 | -8.215516         | 4.120708           |      |        |         |
| soil type Spodosols                      | -2.087589  | 2.277309  | -0.92 | 0.3688 | -6.798563         | 2.623384           |      |        |         |
| soil type Ultisols                       | -0.3399088 | 1.648196  | -0.21 | 0.8384 | -3.749461         | 3.069644           |      |        |         |
| soil type Vertisols                      | -2.73738   | 2.981698  | -0.92 | 0.3681 | -8.905493         | 3.430732           |      |        |         |
| vegetation Forests                       | 1.239949   | 2.539559  | 0.49  | 0.6291 | -3.954133         | 6.433831 F(2 29)   | =    | 1.54   | 0.0338  |
| vegetation Grasslands                    | 3.444931   | 2.788151  | 1.24  | 0.2265 | -2.257478         | 9.147339           |      |        |         |
| Europe                                   | 0.1570522  | 0.949964  | 0.17  | 0.87   | -1.799435         | 2.11354 F(6 25)    | =    | 4.45   | 0.4003  |
| the Middle East                          | -0.7483858 | 2.10045   | -0.36 | 0.7246 | -5.074343         | 3.577571           |      |        |         |
| North America                            | -0.3666175 | 1.150464  | -0.32 | 0.7526 | -2.736042         | 2.002807           |      |        |         |
| Oceania                                  | -1.091243  | 1.575337  | -0.69 | 0.4949 | -4.335711         | 2.153225           |      |        |         |
| South America                            | 4.586118   | 1.231498  | 3.72  | 0.001  | 2.049801          | 7.122434           |      |        |         |
| Sub Saharan Africa                       | 3.999611   | 1.575337  | 2.54  | 0.0177 | 0.7551431         | 7.244078           |      |        |         |
| total abundance of AMR gene              |            |           |       |        |                   |                    |      |        |         |
| city longitude                           | -0.6406092 | 0.4708861 | -1.36 | 0.1838 | -1.602287         | 0.3210685 F(1 30)  | =    | 1.85   | 0.0267  |
| city latitude                            | -1.011777  | 1.362054  | -0.74 | 0.4634 | -3.793462         | 1.769909 F(1 30)   | =    | 0.55   | -0.0147 |
| city total population                    | -0.41909   | 1.256796  | -0.33 | 0.7413 | -2.99352          | 2.15534 F(1 28)    | =    | 0.11   | -0.0316 |
| city population density                  | -0.0099172 | 0.00779   | -1.27 | 0.2138 | -0.025901         | 0.0060666 F(1 27)  | =    | 1.62   | 0.0217  |
| city ave june temp                       | 2.539462   | 6.005993  | 0.42  | 0.6758 | -9.783818         |                    |      |        |         |



|                                         |                 |                  |            |               |                             |                         |          |                     |               |
|-----------------------------------------|-----------------|------------------|------------|---------------|-----------------------------|-------------------------|----------|---------------------|---------------|
| urban-rural temperature difference day  | -0.0786908      | 37.84976         | 0          | 0.9984        | -78.37689                   | 78.21951 F(1 23)        | =        | 0.00                | -0.0435       |
| urban-rural temperature difference nigh | -9.522687       | 35.014           | -0.27      | 0.7881        | -81.95467                   | 62.90929 F(1 23)        | =        | 0.07                | -0.0401       |
| greenness fraction                      | 71.27649        | 201.1308         | 0.35       | 0.7255        | -339.4874                   | 482.0403 F(1 30)        | =        | 0.13                | -0.029        |
| DHI                                     | 148.85          | 79.57457         | 1.87       | 0.0712        | -13.66294                   | 311.363 F(1 30)         | =        | 3.50                | 0.0746        |
| DNI                                     | -25.82553       | 29.84554         | -0.87      | 0.3937        | -86.77825                   | 35.1272 F(1 30)         | =        | 0.75                | -0.0082       |
| GHI                                     | 25.93773        | 45.34711         | 0.57       | 0.5716        | -66.67342                   | 118.5489 F(1 30)        | =        | 0.33                | -0.0222       |
| UVindex                                 | 15.35358        | 13.11388         | 1.17       | 0.2509        | -11.42852                   | 42.13569 F(1 30)        | =        | 1.37                | 0.0118        |
| wet                                     | 0.15488         | 8.337101         | 0.02       | 0.9853        | -16.87175                   | 17.18151 F(1 30)        | =        | 0.00                | -0.0333       |
| pet                                     | 2.049078        | 38.63896         | 0.05       | 0.9581        | -76.86221                   | 80.96036 F(1 30)        | =        | 0.00                | -0.0332       |
| rh                                      | 3.540078        | 3.544708         | 1          | 0.3288        | -3.811197                   | 10.89135 F(1 22)        | =        | 1.00                | -0.0001       |
| vap                                     | 10.22073        | 5.476526         | 1.87       | 0.0718        | -0.963827                   | 21.40529 F(1 30)        | =        | 3.48                | 0.0742        |
| temperature                             | 7.378496        | 5.54515          | 1.33       | 0.1933        | -3.94621                    | 18.7032 F(1 30)         | =        | 1.77                | 0.0243        |
| fire carbon emissions                   | 0.0469044       | 0.9037446        | 0.05       | 0.959         | -1.798788                   | 1.892597 F(1 30)        | =        | 0.00                | -0.0332       |
| GDP                                     | -2.479509       | 1.758439         | -1.41      | 0.1692        | -6.07592                    | 1.116902 F(1 29)        | =        | 1.99                | 0.0319        |
| anti consum                             | -3.263096       | 5.414597         | -0.6       | 0.5513        | -14.32118                   | 7.794987 F(1 30)        | =        | 0.36                | -0.021        |
| coastal city                            | -85.57104       | 74.54837         | -1.15      | 0.2601        | -237.8191                   | 66.67704 F(1 30)        | =        | 1.32                | 0.0101        |
| main clima-l                            | 281.6191        | 155.5914         | 1.81       | 0.081         | -37.09536                   | 600.3336 F(2 28)        | =        | 3.40                | 0.1883        |
| main climate snow                       | 222.4238        | 165.0296         | 1.35       | 0.1885        | -115.6239                   | 560.4715                |          |                     |               |
| main climate warm                       | 32.06029        | 141.3229         | 0.23       | 0.8222        | -257.4265                   | 321.5471                |          |                     |               |
| soil type Andisols                      | -160.0705       | 150.6876         | -1.06      | 0.2991        | -471.7915                   | 151.6506 F(8 23)        | =        | 1.20                | 0.0484        |
| soil type Entisols                      | -169.0073       | 138.4154         | -1.22      | 0.2344        | -455.3414                   | 117.3268                |          |                     |               |
| soil type Inceptisols                   | -144.0237       | 117.6305         | -1.22      | 0.2332        | -387.3609                   | 99.31341                |          |                     |               |
| soil type Gelisols                      | 247.0291        | 172.6343         | 1.43       | 0.1659        | -110.0922                   | 604.1505                |          |                     |               |
| soil type Oxisols                       | -180.2828       | 226.0314         | -0.8       | 0.4333        | -647.8644                   | 287.2988                |          |                     |               |
| soil type Spodosols                     | -197.6949       | 172.6343         | -1.15      | 0.2639        | -554.8162                   | 159.4265                |          |                     |               |
| soil type Ultisols                      | -17.723         | 124.9436         | -0.14      | 0.8915        | -275.6954                   | 241.2354                |          |                     |               |
| soil type Vertisols                     | -211.7093       | 226.0314         | -0.94      | 0.3587        | -679.2909                   | 255.8722                |          |                     |               |
| vegetation Forests                      | 85.71811        | 200.7336         | 0.43       | 0.6725        | -324.8281                   | 496.2644 F(2 29)        | =        | 3.35                | 0.1315        |
| vegetation Grasslands                   | 351.5451        | 220.3829         | 1.6        | 0.1215        | -99.18851                   | 802.2787                |          |                     |               |
| Europe                                  | -42.37023       | 92.8906          | -0.46      | 0.6522        | -323.682                    | 148.9415 F(6 25)        | =        | 2.10                | 0.175         |
| the Middle East                         | -83.41399       | 205.3888         | -0.41      | 0.6881        | -506.4202                   | 339.5922                |          |                     |               |
| North America                           | 109.6752        | 112.4961         | 0.97       | 0.3389        | -122.0148                   | 341.3653                |          |                     |               |
| Oceania                                 | -93.08492       | 154.0416         | -0.6       | 0.5511        | -410.3396                   | 224.1697                |          |                     |               |
| South America                           | 98.87932        | 120.4199         | 0.82       | 0.4193        | -149.1301                   | 346.8887                |          |                     |               |
| Sub Saharan Africa                      | 421.5424        | 154.0416         | 2.74       | 0.0113        | 104.2877                    | 738.7971                |          |                     |               |
| <b>total prevalence of AMR gene</b>     | <b>Coef.</b>    | <b>Std. Err.</b> | <b>t</b>   | <b>P&gt;t</b> | <b>[95% Conf. Interval]</b> | <b>F</b>                |          | <b>AdjR-squared</b> |               |
| city longitude                          | -0.0867818      | 0.0338577        | -2.56      | 0.0156        | -0.1559284                  | -0.0176352 F(1 30)      | =        | 6.57                | 0.1523        |
| city latitude                           | -0.1844374      | 0.1004032        | -1.84      | 0.0761        | -0.389488                   | 0.0206133 F(1 30)       | =        | 3.37                | 0.0711        |
| city total population                   | 0.041023        | 0.0966947        | 0.42       | 0.6746        | -0.1570472                  | 0.2390932 F(1 28)       | =        | 0.18                | -0.0291       |
| city population density                 | -0.0006065      | 0.0005593        | -1.08      | 0.2878        | -0.0017541                  | 0.0005412 F(1 27)       | =        | 1.18                | 0.0062        |
| city ave june temp                      | -0.4511042      | 0.4204186        | -1.07      | 0.2928        | -1.313732                   | 0.4115237 F(1 27)       | =        | 1.15                | 0.0054        |
| pm25                                    | 0.2602398       | 0.1661093        | 1.57       | 0.1277        | -0.0790007                  | 0.5994802 F(1 30)       | =        | 2.45                | 0.0448        |
| pm10                                    | 0.1170594       | 0.17776          | 0.66       | 0.5226        | -0.2702463                  | 0.5043651 F(1 12)       | =        | 0.43                | -0.0455       |
| o3                                      | -0.2710066      | 0.2826204        | -0.96      | 0.348         | -0.8571255                  | 0.3151123 F(1 22)       | =        | 0.92                | -0.0035       |
| no2                                     | -0.178634       | 0.1115312        | -1.6       | 0.1301        | -0.416357                   | 0.0509891 F(1 15)       | =        | 2.57                | 0.0891        |
| co                                      | -0.1642463      | 0.0927609        | -1.77      | 0.0936        | -0.3591297                  | 0.030637 F(1 18)        | =        | 3.14                | 0.101         |
| soil ph                                 | -0.4023798      | 0.359808         | -1.12      | 0.2723        | -1.137206                   | 0.3324462 F(1 30)       | =        | 1.25                | 0.008         |
| <b>soil organic carbon density</b>      | <b>1.086173</b> | <b>0.3751539</b> | <b>2.9</b> | <b>0.007</b>  | <b>0.3200061</b>            | <b>1.852339 F(1 30)</b> | <b>=</b> | <b>8.38</b>         | <b>0.1923</b> |
| soil organic carbon                     | 0.0149169       | 0.0197403        | 0.76       | 0.4564        | -0.0255869                  | 0.0554207 F(1 27)       | =        | 0.57                | -0.0156       |
| soil total carbon                       | -0.0008482      | 0.0122432        | -0.07      | 0.9453        | -0.0259691                  | 0.0242727 F(1 27)       | =        | 0.00                | -0.0369       |
| soil total phosphorus                   | -0.0090011      | 0.0115134        | -0.78      | 0.4405        | -0.0325146                  | 0.0145125 F(1 30)       | =        | 0.61                | -0.0127       |
| soil moisture(0-10cm)                   | -0.7864553      | 0.8998636        | -0.85      | 0.4016        | -2.609957                   | 1.077027 F(1 28)        | =        | 0.73                | -0.0096       |
| soil moisture(10-40cm)                  | -0.1243684      | 0.3292217        | -0.38      | 0.7085        | -0.7987484                  | 0.5500115 F(1 28)       | =        | 0.14                | -0.0305       |
| soil tmp                                | 0.6622134       | 0.4355511        | 1.52       | 0.1396        | -0.2299726                  | 1.554399 F(1 28)        | =        | 2.31                | 0.0433        |
| precipitation                           | -0.0012125      | 0.0042583        | -0.28      | 0.7778        | -0.0099091                  | 0.0074841 F(1 30)       | =        | 0.08                | -0.0305       |
| SDP                                     | -0.0109933      | 0.0860747        | -0.13      | 0.8992        | -0.1867812                  | 0.1647946 F(1 30)       | =        | 0.02                | -0.0328       |
| PCI                                     | -0.0740633      | 0.3631143        | -0.2       | 0.8398        | -0.8156417                  | 0.6675151 F(1 30)       | =        | 0.04                | -0.0319       |
| urban-rural temperature difference day  | 1.689565        | 2.841546         | 0.59       | 0.5579        | -4.18862                    | 7.567751 F(1 23)        | =        | 0.35                | -0.0277       |
| urban-rural temperature difference nigh | -2.733274       | 2.591095         | -1.05      | 0.3024        | -8.093363                   | 2.626814 F(1 23)        | =        | 1.11                | 0.0047        |
| greenness fraction                      | 17.52122        | 15.19536         | 1.15       | 0.258         | -13.51184                   | 48.55428 F(1 30)        | =        | 1.33                | 0.0105        |
| DHI                                     | 14.87874        | 5.881427         | 2.53       | 0.0169        | 2.867269                    | 26.89022 F(1 30)        | =        | 6.40                | 0.1483        |
| DNI                                     | 0.454346        | 2.326476         | 0.2        | 0.8465        | -4.296951                   | 5.205643 F(1 30)        | =        | 0.04                | -0.032        |
| GHI                                     | 7.225765        | 3.255609         | 2.22       | 0.0342        | 0.5769242                   | 13.8746 F(1 30)         | =        | 4.93                | 0.1124        |
| UVindex                                 | 2.943379        | 0.8824238        | 3.34       | 0.0023        | 1.141229                    | 4.745529 F(1 30)        | =        | 11.13               | 0.2462        |
| wet                                     | -0.3705678      | 0.6387586        | -0.58      | 0.5662        | -1.675087                   | 0.9339513 F(1 30)       | =        | 0.34                | -0.0219       |
| pet                                     | 1.029005        | 2.971126         | 0.35       | 0.7315        | -5.038845                   | 7.906854 F(1 30)        | =        | 0.12                | -0.0292       |
| RH                                      | -0.2448595      | 0.2543952        | -0.96      | 0.3463        | -0.7724427                  | 0.2827238 F(1 22)       | =        | 0.93                | -0.0032       |
| vap                                     | 0.6890174       | 0.4276386        | 1.61       | 0.1176        | -0.184337                   | 1.562372 F(1 30)        | =        | 2.60                | 0.049         |
| temperature                             | 0.6391143       | 0.4238824        | 1.51       | 0.1421        | -0.2265691                  | 1.504798 F(1 30)        | =        | 2.27                | 0.0395        |
| fire carbon emissions                   | -0.0038421      | 0.0696282        | -0.06      | 0.9564        | -0.1460417                  | 0.1383576 F(1 30)       | =        | 0.00                | -0.0332       |
| GDP                                     | -0.3163339      | 0.1270719        | -2.49      | 0.0188        | -0.5762252                  | -0.0564427 F(1 29)      | =        | 6.20                | 0.1477        |
| anti consum                             | -0.9347336      | 0.3834179        | -2.44      | 0.0209        | -1.717777                   | -0.1516899 F(1 30)      | =        | 5.94                | 0.1375        |
| coastal city                            | -8.742033       | 5.647095         | -1.55      | 0.1321        | -20.27494                   | 2.790873 F(1 30)        | =        | 2.40                | 0.0431        |
| main clima-l                            | 20.24254        | 12.94297         | 1.56       | 0.1291        | -6.268926                   | 46.75501 F(3 28)        | =        | 1.59                | 0.0538        |
| main climate snow                       | 2.094418        | 13.72809         | 0.15       | 0.8798        | -26.0263                    | 30.21514                |          |                     |               |
| main climate warm                       | 6.730839        | 11.75603         | 0.57       | 0.5715        | -17.3503                    | 30.81198                |          |                     |               |
| soil type Andisols                      | -14.79722       | 13.04597         | -1.13      | 0.2684        | -41.78487                   | 12.19044 F(8 23)        | =        | 0.35                | -0.2016       |
| soil type Entisols                      | -3.51111        | 11.98349         | -0.29      | 0.7722        | -28.30084                   | 21.27864                |          |                     |               |
| soil type Inceptisols                   | -5.76825        | 10.18401         | -0.57      | 0.5766        | -26.83548                   | 15.29898                |          |                     |               |
| soil type Gelisols                      | -12.48059       | 14.94604         | -0.84      | 0.4123        | -43.39883                   | 18.43766                |          |                     |               |
| soil type Oxisols                       | -15.62957       | 19.56896         | -0.8       | 0.4326        | -56.11105                   | 24.85191                |          |                     |               |
| soil type Spodosols                     | -15.79894       | 14.94604         | -1.06      | 0.3015        | -46.71718                   | 15.11931                |          |                     |               |
| soil type Ultisols                      | -8.815485       | 10.81715         | -0.81      | 0.4235        | -31.19247                   | 13.5615                 |          |                     |               |
| soil type Vertisols                     | -17.6016        | 19.56896         | -0.9       | 0.3777        | -58.08308                   | 22.87988                |          |                     |               |
| vegetation Forests                      | 7.346057        | 16.36367         | 0.45       | 0.6568        | -26.1214                    | 40.81352 F(2 29)        | =        | 1.44                | 0.0277        |
| vegetation Grasslands                   | 21.15088        | 17.96547         | 1.18       | 0.2486        | -15.59262                   | 57.89439                |          |                     |               |
| Europe                                  | 1.036555        | 5.335082         | 0.19       | 0.8475        | -9.951251                   | 12.02436 F(6 25)        | =        | 7.10                | 0.5415        |
| the Middle East                         | -1.073557       | 11.79631         | -0.09      | 0.9282        | -25.36851                   | 23.2214                 |          |                     |               |
| North America                           | 8.494653        | 6.461105         | 1.31       | 0.2005        | -4.812241                   | 21.80155                |          |                     |               |
| Oceania                                 | -1.637843       | 8.847232         | -0.19      | 0.8546        | -19.85906                   | 16.58337                |          |                     |               |
| South America                           | 29.80999        | 6.9162           | 4.31       | 0.0002        | 15.56581                    | 44.05417                |          |                     |               |
| Sub Saharan Africa                      | 39.91356        | 8.847232         | 4.51       | 0.0001        | 21.69234                    | 58.13478                |          |                     |               |

**Supplementary Table 13.** Results of regression analysis, pathogens VS environment and demographic characteristics

Green =  $p < 0.05$ , after regression diagnosis  
 White =  $p > 0.05$

|                                          | Coef.              | Std. Err.        | t            | P>t           | [95% Conf. Interval] | AdjR-squared      |
|------------------------------------------|--------------------|------------------|--------------|---------------|----------------------|-------------------|
| <b>total prevalence</b>                  |                    |                  |              |               |                      |                   |
| city longie                              | -0.0021972         | 0.0012395        | -1.77        | 0.0864        | -0.0047286           | 0.0003341         |
| city latitude                            | -0.0065426         | 0.0034921        | -1.87        | 0.0708        | -0.0136744           | 0.0005893         |
| <b>city total population</b>             | <b>0.0071024</b>   | <b>0.0031255</b> | <b>2.27</b>  | <b>0.0309</b> | <b>0.0007</b>        | <b>0.0135048</b>  |
| city population density                  | -0.00000107        | 0.0000228        | -0.05        | 0.963         | -0.0000479           | 0.0000457         |
| <b>city ave june temp</b>                | <b>-0.0364826</b>  | <b>0.0156375</b> | <b>-2.33</b> | <b>0.0273</b> | <b>-0.0685681</b>    | <b>-0.0043971</b> |
| pm25                                     | 0.0044761          | 0.0059656        | 0.75         | 0.4589        | -0.0077073           | 0.0166595         |
| pm10                                     | 0.0248426          | 0.0055836        | 4.45         | 0.0008        | 0.012677             | 0.0370083         |
| o3                                       | -0.0047751         | 0.0052017        | -0.92        | 0.3686        | -0.0155627           | 0.0060125         |
| no2                                      | -0.0043268         | 0.0027244        | -1.59        | 0.1331        | -0.0101338           | 0.0014801         |
| co                                       | -0.0015573         | 0.0021112        | -0.74        | 0.4703        | -0.0059928           | 0.0028782         |
| soil ph                                  | -0.0085066         | 0.012704         | -0.67        | 0.5082        | -0.0344516           | 0.0174384         |
| soil organic carbon density              | 0.0451027          | 0.0122843        | 3.67         | 0.0009        | 0.0200148            | 0.0701906         |
| soil organic carbon                      | 0.000903           | 0.0006757        | 1.34         | 0.1926        | -0.0004834           | 0.0028993         |
| soil total carbon                        | 0.0002062          | 0.0004529        | 0.46         | 0.6526        | -0.000723            | 0.0011354         |
| soil total phosphorus                    | -0.0003344         | 0.0004007        | -0.83        | 0.4106        | -0.0011527           | 0.0004839         |
| soil moisture(0-10cm)                    | 0.0408678          | 0.0309472        | 1.32         | 0.1973        | -0.0225246           | 0.1042602         |
| soil moisture(10-40cm)                   | 0.015722           | 0.0111605        | 1.41         | 0.1699        | -0.0071393           | 0.0385833         |
| soil tmp                                 | -0.0008479         | 0.0158564        | -0.05        | 0.9577        | -0.0333282           | 0.0316325         |
| precipitation                            | -0.0000374         | 0.0001485        | -0.25        | 0.8031        | -0.0003405           | 0.0002658         |
| SDP                                      | 0.0005329          | 0.0029991        | 0.18         | 0.8602        | -0.005592            | 0.0066578         |
| PCI                                      | 0.0031905          | 0.0126504        | 0.25         | 0.8026        | -0.0226451           | 0.0290261         |
| urban-rural temperature difference day   | -0.0000267         | 0.1029215        | 0            | 0.9998        | -0.2129361           | 0.2128828         |
| urban-rural temperature difference night | -0.1328481         | 0.0912516        | -1.46        | 0.159         | -0.3216165           | 0.0559203         |
| greenfraction                            | 0.4855118          | 0.5338797        | 0.91         | 0.3704        | -0.6048161           | 1.57584           |
| DHI                                      | 0.1735059          | 0.2235505        | 0.78         | 0.4437        | -0.2830451           | 0.630057          |
| DNI                                      | 0.0451683          | 0.0807124        | 0.56         | 0.5799        | -0.1196684           | 0.2100051         |
| GHI                                      | 0.14863            | 0.119379         | 1.25         | 0.2228        | -0.0951746           | 0.3924345         |
| UVindex                                  | 0.0872512          | 0.0322924        | 2.7          | 0.0112        | 0.0213013            | 0.153201          |
| wet                                      | -0.0044634         | 0.0223714        | -0.2         | 0.8432        | -0.0501518           | 0.041225          |
| pet                                      | -0.0748369         | 0.1028513        | -0.73        | 0.4725        | -0.2848874           | 0.1352135         |
| RH                                       | 0.0008678          | 0.0047681        | 0.18         | 0.8572        | -0.0090207           | 0.0107563         |
| vap                                      | -0.0023797         | 0.0155292        | -0.15        | 0.8792        | -0.0340946           | 0.0293352         |
| temperature                              | -0.0049671         | 0.0152956        | -0.32        | 0.7476        | -0.0362048           | 0.0262707         |
| fire carbon emissions                    | -0.0009835         | 0.0024201        | -0.41        | 0.6874        | -0.005926            | 0.0039591         |
| GDP                                      | -0.0087072         | 0.0046008        | -1.89        | 0.0684        | -0.0181168           | 0.0007025         |
| anti consum                              | 0.0008266          | 0.0146258        | 0.06         | 0.9553        | -0.0290432           | 0.0306964         |
| coastal city                             | -0.3021815         | 0.1969375        | -1.53        | 0.1354        | -0.7043816           | 0.1000196         |
| main clima-l                             | 0.1651143          | 0.4787241        | 0.34         | 0.7327        | -0.8155076           | 1.145736          |
| main climate snow                        | 0.0385825          | 0.5077636        | 0.08         | 0.94          | -1.001524            | 1.078689          |
| main climate warm                        | 0.2999823          | 0.4348228        | 0.69         | 0.4959        | -0.5907118           | 1.190676          |
| soil type Andisols                       | 0.0093024          | 0.4454689        | 0.02         | 0.9835        | -0.9122202           | 0.9308251         |
| soil type Entisols                       | 0.4527061          | 0.4091893        | 1.11         | 0.28          | -0.3937665           | 1.299179          |
| soil type Inceptisols                    | 0.4628735          | 0.3477441        | 1.33         | 0.1962        | -0.2564899           | 1.182237          |
| soil type Gelisols                       | 0.0113742          | 0.5103488        | 0.02         | 0.9824        | -1.044363            | 1.067111          |
| soil type Oxisols                        | -0.032531          | 0.6682034        | -0.05        | 0.9616        | -1.414815            | 1.349753          |
| soil type Spodosols                      | -0.0113992         | 0.5103488        | -0.02        | 0.9824        | -1.067136            | 1.044338          |
| soil type Ultisols                       | 0.1287309          | 0.3693633        | 0.35         | 0.7306        | -0.6353554           | 0.8928171         |
| soil type Vertisols                      | -0.083813          | 0.6682034        | -0.13        | 0.9013        | -1.4466097           | 1.298471          |
| vegetation Forests                       | 0.2762507          | 0.5916933        | 0.47         | 0.6441        | -0.933898            | 1.486399          |
| vegetation Grasslands                    | 0.0695255          | 0.6496127        | 0.11         | 0.9155        | -1.259082            | 1.398133          |
| Europe                                   | 0.0344964          | 0.2216705        | 0.16         | 0.8776        | -0.4220427           | 0.4910354         |
| the Middle East                          | -0.0879507         | 0.490132         | -0.18        | 0.859         | -1.097396            | 0.9214951         |
| North America                            | -0.0082923         | 0.2684564        | -0.03        | 0.9756        | -0.5611885           | 0.544604          |
| Oceania                                  | -0.023665          | 0.367599         | -0.06        | 0.9492        | -0.7807493           | 0.7334194         |
| <b>South America</b>                     | <b>1.170332</b>    | <b>0.2873654</b> | <b>4.07</b>  | <b>0.0004</b> | <b>0.5784919</b>     | <b>1.762172</b>   |
| <b>Sub Saharan Africa</b>                | <b>0.0192009</b>   | <b>0.367599</b>  | <b>0.05</b>  | <b>0.9588</b> | <b>-0.7378835</b>    | <b>0.7762852</b>  |
| <b>abundance of Brucella</b>             |                    |                  |              |               |                      |                   |
| city longitude                           | -0.00000073        | 0.00000308       | -0.24        | 0.8146        | -0.00000703          | 0.00000557        |
| city latitude                            | 0.00000833         | 0.00000861       | 0.97         | 0.3413        | -0.00000926          | 0.0000259         |
| city total population                    | 0.0000133          | 0.00000768       | 1.73         | 0.0954        | -0.00000248          | 0.0000029         |
| city population density                  | -3.94E-09          | 5.42E-08         | -0.07        | 0.9426        | -0.000000115         | 0.000000107       |
| city ave june temp                       | -0.0000512         | 0.0000395        | -1.3         | 0.2058        | -0.0001323           | 0.0000299         |
| pm25                                     | -0.00000506        | 0.0000142        | -0.36        | 0.7247        | -0.0000341           | 0.0000024         |
| pm10                                     | 0.000000324        | 0.00000191       | 1.7          | 0.1153        | -9.18E-08            | 0.000000739       |
| o3                                       | 0.000017           | 0.0000453        | 0.37         | 0.7121        | -0.0000771           | 0.0000111         |
| no2                                      | -0.0000385         | 0.0000293        | -1.31        | 0.2094        | -0.000101            | 0.0000024         |
| co                                       | 0.00000941         | 0.000019         | 0.5          | 0.6265        | -0.0000305           | 0.0000493         |
| soil ph                                  | 0.0000474          | 0.0000291        | 1.63         | 0.1133        | -0.0000119           | 0.0001068         |
| soil organic carbon density              | 0.0000227          | 0.0000348        | 0.65         | 0.5197        | -0.0000484           | 0.0000937         |
| soil organic carbon                      | -0.00000396        | 0.0000166        | -0.24        | 0.8135        | -0.00000381          | 0.00000302        |
| soil total carbon                        | 1.73E-08           | 0.00000108       | 0.02         | 0.9874        | -0.00000221          | 0.00000224        |
| soil total phosphorus                    | 0.00000105         | 0.00000941       | 1.11         | 0.2741        | -0.00000874          | 0.00000297        |
| soil moisture(0-10cm)                    | 0.0000586          | 0.0000751        | 0.78         | 0.442         | -0.0000952           | 0.0002124         |
| soil moisture(10-40cm)                   | 0.0000226          | 0.0000271        | 0.83         | 0.4129        | -0.000033            | 0.0000782         |
| soil tmp                                 | -0.0000333         | 0.0000372        | -0.89        | 0.3788        | -0.0001095           | 0.0000429         |
| precipitation                            | -0.00000178        | 0.00000351       | -0.51        | 0.6156        | -0.00000894          | 0.00000538        |
| SDP                                      | -0.00000322        | 0.00000709       | -0.45        | 0.6531        | -0.0000177           | 0.0000113         |
| PCI                                      | -0.00000602        | 0.00003          | -0.2         | 0.8422        | -0.0000673           | 0.0000552         |
| urban-rural temperature difference day   | 0.0000176          | 0.0002464        | 0.07         | 0.9435        | -0.000492            | 0.0005273         |
| urban-rural temperature difference night | 0.0000343          | 0.0002282        | 0.15         | 0.8818        | -0.0004377           | 0.0005063         |
| greenfraction                            | 0.0005843          | 0.0012779        | 0.46         | 0.6508        | -0.0020255           | 0.0031942         |
| DHI                                      | -0.0003473         | 0.0005312        | -0.65        | 0.5182        | -0.0014322           | 0.0007376         |
| DNI                                      | -0.0002057         | 0.0001885        | -1.09        | 0.284         | -0.0005908           | 0.0001794         |
| GHI                                      | -0.0004638         | 0.0002775        | -1.67        | 0.105         | -0.0010304           | 0.0001029         |
| UVindex                                  | -0.0000986         | 0.0000834        | -1.18        | 0.2463        | -0.0002689           | 0.0000717         |
| wet                                      | -0.00000355        | 0.000053         | -0.07        | 0.9472        | -0.0001119           | 0.0001048         |
| pet                                      | -0.0003285         | 0.0002384        | -1.38        | 0.1785        | -0.0008154           | 0.0001584         |
| RH                                       | -0.00000988        | 0.0000409        | -0.24        | 0.8114        | -0.0000947           | 0.0000749         |
| vap                                      | -0.0000252         | 0.0000365        | -0.69        | 0.4962        | -0.0000998           | 0.0000494         |
| temperature                              | -0.0000332         | 0.0000358        | -0.93        | 0.361         | -0.0001063           | 0.0000399         |
| fire carbon emissions                    | -0.00000164        | 0.00000574       | -0.29        | 0.7768        | -0.0000134           | 0.0000101         |
| GDP                                      | 0.00000344         | 0.0000115        | 0.3          | 0.7678        | -0.0000202           | 0.0000271         |
| anti consum                              | 0.00000676         | 0.0000346        | 0.2          | 0.8466        | -0.000064            | 0.0000775         |
| coastal city                             | -0.0004503         | 0.0004776        | -0.94        | 0.3533        | -0.0014256           | 0.0005251         |
| main clima-l                             | 0.00000604         | 0.0011454        | 0.01         | 0.9958        | -0.0023402           | 0.0023523         |
| main climate snow                        | 0.0000138          | 0.0012149        | 0.01         | 0.991         | -0.0024748           | 0.0025024         |
| main climate warm                        | 0.0003804          | 0.0010404        | 0.37         | 0.7174        | -0.0017507           | 0.0025115         |
| soil type Andisols                       | 0.00000372         | 0.0010849        | 0            | 0.9973        | -0.0022406           | 0.0022481         |
| soil type Entisols                       | 0.00000718         | 0.0009966        | 0.01         | 0.9943        | -0.0020544           | 0.0020688         |
| soil type Inceptisols                    | 0.000943           | 0.0008469        | 1.11         | 0.277         | -0.000809            | 0.002695          |
| soil type Gelisols                       | -0.0000147         | 0.001243         | -0.01        | 0.9906        | -0.002586            | 0.0025565         |
| soil type Oxisols                        | -0.0000147         | 0.0016274        | -0.01        | 0.9929        | -0.0033813           | 0.0033518         |
| soil type Spodosols                      | -0.0000147         | 0.001243         | -0.01        | 0.9906        | -0.002586            | 0.0025565         |
| soil type Ultisols                       | -0.00000796        | 0.0008996        | -0.01        | 0.993         | -0.0018689           | 0.001853          |
| soil type Vertisols                      | -0.0000147         | 0.0016274        | -0.01        | 0.9929        | -0.0033813           | 0.0033518         |
| vegetation Forests                       | 0.0002763          | 0.001413         | 0.2          | 0.8463        | -0.0026136           | 0.0031662         |
| vegetation Grasslands                    | 0.00000466         | 0.0015513        | 0            | 0.9976        | -0.0031681           | 0.0031774         |
| Europe                                   | 0.0006884          | 0.0007021        | 0.98         | 0.3363        | -0.0007577           | 0.0021344         |
| the Middle East                          | 0.0000028          | 0.0015524        | 0            | 0.9986        | -0.0031945           | 0.0032001         |
| North America                            | -0.00000263        | 0.0008503        | 0            | 0.9976        | -0.0017539           | 0.0017486         |
| Oceania                                  | -0.000011          | 0.0011643        | -0.01        | 0.9926        | -0.0024089           | 0.002387          |
| <b>South America</b>                     | <b>-0.00000576</b> | <b>0.0009102</b> | <b>-0.01</b> | <b>0.995</b>  | <b>-0.0018803</b>    | <b>0.0018688</b>  |
| <b>Sub Saharan Africa</b>                | <b>0.0000259</b>   | <b>0.0011643</b> | <b>0.02</b>  | <b>0.9824</b> | <b>-0.0023721</b>    | <b>0.0024239</b>  |
| <b>abundance of Salmonella enterica</b>  |                    |                  |              |               |                      |                   |
|                                          | Coef.              | Std. Err.        | t            | P>t           | [95% Conf. Interval] | AdjR-squared      |

|                                          |              |                  |          |               |                             |                     |         |
|------------------------------------------|--------------|------------------|----------|---------------|-----------------------------|---------------------|---------|
| city longitude                           | -0.0000175   | 0.00000171       | -1.02    | 0.3139        | -0.00000524                 | 0.00000174          | 0.0016  |
| city latitude                            | 0.00000182   | 0.00000491       | 0.37     | 0.714         | -0.00000821                 | 0.0000118           | -0.0286 |
| city total population                    | -0.000000854 | 0.00000447       | -0.19    | 0.85          | -0.00001                    | 0.00000831          | -0.0344 |
| city population density                  | -1.88E-08    | 2.97E-08         | -0.63    | 0.5318        | -7.97E-08                   | 4.21E-08            | -0.0219 |
| city ave june temp                       | -0.0000014   | 0.00000223       | -0.63    | 0.5369        | -0.00000597                 | 0.00000318          | -0.0222 |
| pm25                                     | -0.00000923  | 0.00000785       | -1.18    | 0.249         | -0.0000253                  | 0.0000068           | 0.0122  |
| pm10                                     | -0.000000749 | 0.0000155        | -0.05    | 0.9624        | -0.00000346                 | 0.00000331          | -0.0831 |
| o3                                       | -0.0000109   | 0.0000201        | -0.55    | 0.5906        | -0.00000525                 | 0.00000306          | -0.0315 |
| no2                                      | -0.0000193   | 0.0000125        | -1.54    | 0.1434        | -0.00000459                 | 0.00000734          | 0.0796  |
| co                                       | -0.00000406  | 0.00000624       | -0.65    | 0.5235        | -0.0000172                  | 0.00000905          | -0.0313 |
| soil ph                                  | 0.0000197    | 0.0000167        | 1.18     | 0.2466        | -0.00000144                 | 0.00000538          | 0.0126  |
| soil organic carbon density              | 0.00000315   | 0.0000189        | 1.67     | 0.105         | -0.00000699                 | 0.000007            | 0.0547  |
| soil organic carbon                      | 0.000000127  | 0.000000924      | 0.14     | 0.8918        | -0.00000177                 | 0.00000202          | -0.0363 |
| soil total carbon                        | -0.000000377 | 0.000000598      | -0.63    | 0.533         | -0.00000116                 | 0.000000849         | -0.0219 |
| soil total phosphorus                    | 0.000000673  | 0.000000526      | 1.28     | 0.2109        | -0.000000402                | 0.00000175          | 0.0201  |
| soil moisture(0-10cm)                    | 0.00000227   | 0.00000421       | 0.54     | 0.5949        | -0.00000636                 | 0.0001089           | -0.0251 |
| soil moisture(10-40cm)                   | 0.000000377  | 0.0000153        | 0.02     | 0.9806        | -0.0000031                  | 0.00000318          | -0.0357 |
| soil tmp                                 | -0.00000241  | 0.0000205        | -1.18    | 0.2497        | -0.00000662                 | 0.0000179           | 0.013   |
| precipitation                            | -6.26E-08    | 0.000000198      | -0.32    | 0.7538        | -0.000000467                | 0.000000341         | -0.0299 |
| SDP                                      | 1.31E-08     | 0.0000004        | 0        | 0.9974        | -0.00000816                 | 0.00000818          | -0.0333 |
| PCI                                      | -0.00000565  | 0.0000169        | -0.34    | 0.7398        | -0.00000401                 | 0.0000288           | -0.0295 |
| urban-rural temperature difference day   | 0.00000986   | 0.0001154        | 0.85     | 0.4016        | -0.0001401                  | 0.0003373           | -0.0114 |
| urban-rural temperature difference night | 0.0001071    | 0.0001063        | 1.01     | 0.324         | -0.0001127                  | 0.0003269           | 0.0007  |
| greenfraction                            | 0.0006017    | 0.000713         | 0.84     | 0.4055        | -0.0008545                  | 0.0020579           | -0.0094 |
| DHI                                      | -0.0002804   | 0.0002966        | -0.95    | 0.3521        | -0.0008861                  | 0.0003254           | -0.0034 |
| DNI                                      | 0.0000256    | 0.0001081        | 0.24     | 0.8146        | -0.0001951                  | 0.0002462           | -0.0314 |
| GHI                                      | -0.0001097   | 0.000162         | -0.68    | 0.5035        | -0.0004405                  | 0.0002211           | -0.0178 |
| UVindex                                  | -0.0000239   | 0.0000478        | -0.5     | 0.6213        | -0.0001215                  | 0.0000738           | -0.0248 |
| wet                                      | 0.0000024    | 0.0000298        | 0.08     | 0.9365        | -0.0000585                  | 0.0000633           | -0.0331 |
| pet                                      | -0.0001214   | 0.0001365        | -0.89    | 0.3811        | -0.0004002                  | 0.0001575           | -0.0068 |
| RH                                       | -0.000000496 | 0.0000182        | -0.03    | 0.9785        | -0.0000382                  | 0.0000372           | -0.0454 |
| vap                                      | -0.0000023   | 0.0000203        | -1.14    | 0.2651        | -0.0000644                  | 0.0000184           | 0.0093  |
| temperature                              | -0.0000297   | 0.0000197        | -1.51    | 0.1424        | -0.00000699                 | 0.0000106           | 0.0393  |
| fire carbon emissions                    | -0.00000243  | 0.0000032        | -0.76    | 0.4537        | -0.00000898                 | 0.00000411          | -0.0139 |
| GDP                                      | 0.00000631   | 0.00000637       | 0.99     | 0.3303        | -0.00000672                 | 0.0000193           | -0.0007 |
| anti consum                              | -0.0000281   | 0.0000188        | -1.49    | 0.1463        | -0.00000665                 | 0.0000104           | 0.038   |
| coastal city                             | -0.0005956   | 0.000025         | -2.38    | 0.0238        | -0.0011062                  | -0.0000085          | 0.131   |
| main clima-l                             | -0.0005403   | 0.0006337        | -0.85    | 0.4011        | -0.0018384                  | 0.0007578           | -0.0508 |
| main climate snow                        | -0.0000927   | 0.0006721        | -0.14    | 0.8913        | -0.0014695                  | 0.0012841           |         |
| main climate warm                        | -0.0004666   | 0.0005756        | -0.81    | 0.4245        | -0.0016456                  | 0.0007125           |         |
| soil type Andisols                       | 0.00000893   | 0.0004817        | 0.02     | 0.9854        | -0.0009875                  | 0.0010053           | 0.2411  |
| soil type Entisols                       | 0.0001418    | 0.0004424        | 0.32     | 0.7515        | -0.0007735                  | 0.0010571           |         |
| soil type Inceptisols                    | 0.0006127    | 0.000376         | 1.63     | 0.1168        | -0.0001651                  | 0.0013906           |         |
| soil type Gelisols                       | 0.0020586    | 0.0005518        | 3.73     | 0.0011        | 0.0009171                   | 0.0032001           |         |
| soil type Oxisols                        | -0.00000411  | 0.0007225        | -0.01    | 0.9955        | -0.0014987                  | 0.0014905           |         |
| soil type Spodosols                      | 0.0005193    | 0.0005518        | 0.94     | 0.3564        | -0.0006222                  | 0.0016609           |         |
| soil type Ultisols                       | 0.0003415    | 0.0003994        | 0.86     | 0.4013        | -0.0004847                  | 0.0011677           |         |
| soil type Vertisols                      | -0.00000411  | 0.0007225        | -0.01    | 0.9955        | -0.0014987                  | 0.0014905           |         |
| vegetation Forests                       | 0.0004153    | 0.0007934        | 0.52     | 0.6047        | -0.0012074                  | 0.002038            | -0.059  |
| vegetation Grasslands                    | 0.0004027    | 0.0008711        | 0.45     | 0.6473        | -0.0013789                  | 0.0021843           |         |
| Europe                                   | 0.0001207    | 0.0003872        | 0.31     | 0.7578        | -0.0006766                  | 0.0009181           | -0.1186 |
| the Middle East                          | -0.0002735   | 0.000856         | -0.32    | 0.752         | -0.00020365                 | 0.0014895           |         |
| North America                            | 0.0005893    | 0.0004689        | 1.26     | 0.2204        | -0.0003764                  | 0.0015549           |         |
| Oceania                                  | 0.000026     | 0.000642         | 0.4      | 0.6889        | -0.0010623                  | 0.0015823           |         |
| South America                            | 0.0000244    | 0.0005019        | 0.05     | 0.9617        | -0.0010093                  | 0.001058            |         |
| Sub Saharan Africa                       | -0.0002733   | 0.000642         | -0.43    | 0.674         | -0.0015956                  | 0.001049            |         |
| <b>total abundance of pathogens</b>      | <b>Coef.</b> | <b>Std. Err.</b> | <b>t</b> | <b>P&gt;t</b> | <b>[95% Conf. Interval]</b> | <b>AdjR-squared</b> |         |
| city longitude                           | -0.0000033   | 0.00000729       | -0.45    | 0.6542        | -0.0000182                  | 0.0000116           | -0.0263 |
| city latitude                            | 0.0000133    | 0.0000206        | 0.65     | 0.5217        | -0.0000287                  | 0.0000554           | -0.0191 |
| city total population                    | 0.0000241    | 0.0000185        | 1.3      | 0.2028        | -0.0000138                  | 0.0000621           | 0.0236  |
| city population density                  | -5.82E-08    | 0.000000127      | -0.46    | 0.6503        | -0.000000319                | 0.000000202         | -0.029  |
| city ave june temp                       | -0.0001238   | 0.0000928        | -1.33    | 0.1932        | -0.0003142                  | 0.0000666           | 0.0271  |
| pm25                                     | -0.0000013   | 0.00000337       | -0.39    | 0.7015        | -0.00000819                 | 0.0000558           | -0.0282 |
| pm10                                     | 0.00000352   | 0.0000385        | 0.92     | 0.3781        | -0.0000486                  | 0.000119            | -0.0127 |
| o3                                       | 0.00000375   | 0.0001007        | 0.37     | 0.7134        | -0.0001713                  | 0.0002462           | -0.0389 |
| no2                                      | -0.0001238   | 0.0000619        | -2       | 0.064         | -0.0002558                  | 0.00000816          | 0.1578  |
| co                                       | 0.00000239   | 0.0000042        | 0.57     | 0.5757        | -0.0000643                  | 0.0001122           | -0.0368 |
| soil ph                                  | 0.0001173    | 0.0000686        | 1.71     | 0.0976        | -0.0000228                  | 0.0002573           | 0.0585  |
| soil organic carbon density              | 0.000136     | 0.0000792        | 1.72     | 0.0964        | -0.0000258                  | 0.0002977           | 0.0591  |
| soil organic carbon                      | 0.000000156  | 0.00000389       | 0.4      | 0.6916        | -0.00000642                 | 0.00000954          | -0.0309 |
| soil total carbon                        | -0.000000926 | 0.00000256       | -0.36    | 0.7198        | -0.00000617                 | 0.00000432          | -0.032  |
| soil total phosphorus                    | 0.000000804  | 0.00000227       | 0.35     | 0.7256        | -0.00000383                 | 0.00000544          | -0.029  |
| soil moisture(0-10cm)                    | 0.0002957    | 0.0001702        | 1.74     | 0.0933        | -0.0000529                  | 0.0006442           | 0.0651  |
| soil moisture(10-40cm)                   | 0.0000984    | 0.0000621        | 1.58     | 0.1243        | -0.0000288                  | 0.0002257           | 0.0495  |
| soil tmp                                 | -0.0000994   | 0.0000087        | -1.14    | 0.2633        | -0.0002777                  | 0.0000789           | 0.0104  |
| precipitation                            | -0.000000319 | 0.000000832      | -0.38    | 0.7044        | -0.00000202                 | 0.00000138          | -0.0283 |
| SDP                                      | -0.000000273 | 0.0000168        | -0.02    | 0.9872        | -0.0000347                  | 0.0000341           | -0.0333 |
| PCI                                      | 0.0000245    | 0.0000709        | 0.35     | 0.7324        | -0.0001204                  | 0.0001694           | -0.0292 |
| urban-rural temperature difference day   | -0.0003048   | 0.0005728        | -0.53    | 0.5998        | -0.0014898                  | 0.0008802           | -0.0308 |
| urban-rural temperature difference night | 0.0002288    | 0.0005319        | 0.43     | 0.6711        | -0.0008715                  | 0.0013291           | -0.0352 |
| greenfraction                            | -0.0008961   | 0.0030333        | -0.3     | 0.7697        | -0.0070909                  | 0.0052987           | -0.0303 |
| DHI                                      | -0.0009539   | 0.0012553        | -0.76    | 0.4533        | -0.0035175                  | 0.0016098           | -0.0138 |
| DNI                                      | -0.0002263   | 0.0004535        | -0.5     | 0.6214        | -0.0011525                  | 0.0006999           | -0.0248 |
| GHI                                      | -0.0007725   | 0.0006725        | -1.15    | 0.2598        | -0.002146                   | 0.000601            | 0.0102  |
| UVindex                                  | -0.0001546   | 0.0002001        | -0.77    | 0.4459        | -0.0005633                  | 0.0002541           | -0.0132 |
| wet                                      | 0.0000189    | 0.0001256        | 0.15     | 0.8812        | -0.0002376                  | 0.0002755           | -0.0326 |
| pet                                      | -0.0006858   | 0.0005688        | -1.21    | 0.2373        | -0.0018474                  | 0.0004757           | 0.0144  |
| RH                                       | -0.0000393   | 0.0000905        | -0.43    | 0.6683        | -0.0002271                  | 0.0001484           | -0.0366 |
| vap                                      | -0.00000818  | 0.0000089        | -0.95    | 0.3487        | -0.0002572                  | 0.0000937           | -0.003  |
| temperature                              | -0.000106    | 0.0000838        | -1.27    | 0.2154        | -0.0002772                  | 0.0000651           | 0.019   |
| fire carbon emissions                    | 0.0000127    | 0.0000134        | 0.95     | 0.3517        | -0.0000147                  | 0.0000401           | -0.0034 |
| GDP                                      | 0.0000185    | 0.0000271        | 0.68     | 0.5005        | -0.0000369                  | 0.0000739           | -0.0181 |
| anti consum                              | -0.0000676   | 0.0000812        | -0.83    | 0.4115        | -0.0002334                  | 0.0000982           | -0.01   |
| coastal city                             | -0.0015363   | 0.0011132        | -1.38    | 0.1777        | -0.0038097                  | 0.000737            | 0.0284  |
| main clima-l                             | -0.0007736   | 0.0027122        | -0.29    | 0.7776        | -0.0063294                  | 0.0047821           | -0.0858 |
| main climate snow                        | 0.0003257    | 0.0028767        | 0.11     | 0.9107        | -0.0055671                  | 0.0062184           |         |
| main climate warm                        | 0.0003539    | 0.0024635        | 0.14     | 0.8868        | -0.0046924                  | 0.0054001           |         |
| soil type Andisols                       | 0.000639     | 0.0024451        | 0.26     | 0.7962        | -0.0044191                  | 0.0056971           | -0.103  |
| soil type Entisols                       | 0.0029092    | 0.002246         | 1.3      | 0.2081        | -0.001737                   | 0.0075553           |         |
| soil type Inceptisols                    | 0.0028298    | 0.0019087        | 1.48     | 0.1518        | -0.0011187                  | 0.0067783           |         |
| soil type Gelisols                       | 0.0039091    | 0.0028012        | 1.4      | 0.1762        | -0.0018857                  | 0.0097039           |         |
| soil type Oxisols                        | -0.0001803   | 0.0036677        | -0.05    | 0.9612        | -0.0077674                  | 0.0074068           |         |
| soil type Spodosols                      | 0.000577     | 0.0028012        | 0.21     | 0.8386        | -0.0052178                  | 0.0063718           |         |
| soil type Ultisols                       | 0.0008586    | 0.0020274        | 0.42     | 0.6759        | -0.0033353                  | 0.0050526           |         |
| soil type Vertisols                      | -0.0002769   | 0.0036677        | -0.08    | 0.9405        | -0.007864                   | 0.0073103           |         |
| vegetation Forests                       | 0.0001534    | 0.0033333        | 0.05     | 0.9636        | -0.006664                   | 0.0069707           | -0.0543 |
| vegetation Grasslands                    | -0.0009618   | 0.0036596        | -0.26    | 0.7946        | -0.0084465                  | 0.006523            |         |
| Europe                                   | 0.0001578    | 0.0016933        | 0.09     | 0.9265        | -0.0033297                  | 0.0036453           | -0.207  |
| the Middle East                          | -0.000109    | 0.0037441        | -0.03    | 0.977         | -0.0078201                  | 0.0076021           |         |
| North America                            | 0.0002854    | 0.0020507        | 0.14     | 0.8904        | -0.0039382                  | 0.0045089           |         |
| Oceania                                  | -0.0012002   | 0.0028081        | -0.43    | 0.6727        | -0.0069835                  | 0.0045832           |         |
| South America                            | -0.000169    | 0.0021952        | -0.08    | 0.9392        | -0.0046901                  | 0.004352            |         |
| Sub Saharan Africa                       | -0.0015849   | 0.0028081        | -0.56    | 0.5775        | -0.0073682                  | 0.0041984           |         |

## Codes used in this study

```
#Alpha diversity
library(vegan)
library(ggplot2)
library(ggpubr)
otu <- read.csv('otu.csv', header=T, row.names=1)
observed_species <- estimateR(otu)[1, ]
Shannon <- diversity(otu, index = 'shannon',base = 2)
result <- data.frame(observed_species, Shannon)

# Boxplot
library(ggplot2)
library(ggpubr)
dat <- read.table("index.txt", header=T)
p<-ggplot(dat,aes(x=continent,y=fisher_alpha,fill=continent))+
  geom_boxplot(show.legend = F,width = 0.5, lwd = 0.6)+
  stat_boxplot(geom = "errorbar", width = 0.2, lwd = 0.6,show.legend = F)+
  theme_bw()+
  theme(panel.grid = element_blank()+
  stat_compare_means(aes(label = ..p.signif..))+
  xlab(""))

#Beta diversity
library(vegan)
library(ggplot2)
library(ggrepel)
otu<-read.table("taxonomy.txt",header=T,row.names = 1)
otu<-as.data.frame(otu)
bray < vegdist(otu,method = "bray")
bray <- as.matrix(bray)
dis <- as.dist(bray)
group <- read.table('group.txt',header = T, row.names = 1, sep = '\t', stringsAsFactors = FALSE)
adonis_result_dis <- adonis2(dis~city,group, permutations = 999,na.action=na.omit) \
adonis_result_dis
for (i in c(54:62)){
  adonis_result<- adonis2(dis~ group[,i],group,permutations = 999,na.action=na.omit)
  write.csv(adonis_result,file=paste("",colnames(group[i]),".csv"))
}

#Bar plot
library(reshape2)
library(ggplot2)
species_top10 <- read.table('abun.txt', row.names = 1, header=T)
```

```

p <- ggplot(species_top10, aes(variable, 100*value, fill = Taxonomy)) +
  geom_col(position = 'stack', width = 0.85) +
  labs(x = "", y = 'Relative Abundance(%)') +
  theme(panel.grid = element_blank(), panel.background = element_rect(color = 'black', fill =
'transparent'), strip.text = element_text(size = 12), strip.background = element_blank()) +
  theme(axis.text.x = element_text(angle = 60, hjust = 1)) +
  theme(axis.text = element_text(size = 10), axis.title = element_text(size = 13), legend.title =
element_blank(), legend.text = element_text(size = 11))
p

```

```

#scatter point
library(ggplot2)
library(ggpubr)
dat<-read.csv("regress.csv",header=T)
p<-ggplot(dat,aes(x=env,y=variable))+
  geom_point()+stat_smooth(method = lm,colour='#FDB462',se = FALSE,size=0.7)+
  theme_bw() +
  theme(panel.grid.major=element_line(colour=NA),panel.grid.minor = element_blank())
p

```

```

#CCA
library(vegan)
library(ggplot2)
otu<-read.table("cca_taxonomy.txt",header=T,row.names = 1)
group <- read.table('cca_group.txt',header = T, row.names = 1, sep = '\t', stringsAsFactors = FALSE)
print(row.names(otu)==row.names(group))
decorana(otu)
otu_cca<-cca(otu,group)
otu_cca.scaling1 <- summary(otu_cca, scaling = 1)
otu_cca.scaling1
otu_cca_test <- anova.cca(out.cca, permutations = 999)
otu_cca_test
otu_cca.site <- data.frame(otu_cca.scaling1$sites)[1:2]
otu_cca.env <- data.frame(otu_cca.scaling1$bplot)[1:2]
r2 <- RsquareAdj(res)
otu_cca_noadj <- r2$r.squared
otu_cca_adj <- r2$adj.r.squared
p <- ggplot(otu_cca.site, aes(CCA1, CCA2)) +
  geom_point(aes(color = group)) +
  scale_color_manual(values =
c('#D92546','#FDB462','#FCCDE5','#538B11','#BC80BD','#4693E2','#ABDEC4')) +
  theme(panel.grid = element_blank(), panel.background = element_rect(color = 'black', fill =
'transparent'), plot.title = element_text(hjust = 0.5), legend.key = element_rect(fill = 'transparent'))
+

```

```
geom_segment(data = otu_cca.env, aes(x=0, xend= CCA1*2.5, y=0, yend= CCA2*2.5 ), arrow =  
arrow(length = unit(0.2, "cm")), colour = 'blue') +  
geom_vline(xintercept = 0, color = 'gray', size = 0.5) +  
geom_hline(yintercept = 0, color = 'gray', size = 0.5) +  
geom_text(data = otu_cca.env, aes(CCA1 * 2.9, CCA2 * 2.9, label = name), color = 'blue', size =
```

3)

p
